1 **Unbiased homeologous recombination during pneumococcal transformation allows for**  
2 **multiple chromosomal integration events**

3

4 Jun Kurushima<sup>1</sup>, Nathalie Campo<sup>2</sup>, Renske van Raaphorst<sup>1</sup>, Guillaume Cerckel<sup>1</sup>,  
5 Patrice Polard<sup>2</sup>, Jan-Willem Veening<sup>1\*</sup>

6

7 <sup>1</sup>Department of Fundamental Microbiology, Faculty of Biology and Medicine, University of  
8 Lausanne, Biophore Building, CH-1015 Lausanne, Switzerland

9 <sup>2</sup>Laboratoire de Microbiologie et Génétique Moléculaires (LMGM), Centre de Biologie  
10 Intégrative (CBI), Toulouse, France

11

12 \*Correspondence to Jan-Willem Veening: [Jan-Willem.Veening@unil.ch](mailto:Jan-Willem.Veening@unil.ch), tel: +41 (0)21  
13 6925625, Twitter: [@JWVeening](#)

14

15 **Abstract**

16 The rapid spread of antimicrobial resistance and vaccine escape in the opportunistic human  
17 pathogen *Streptococcus pneumoniae* can be largely attributed to competence-induced  
18 transformation. To better understand the dynamics of competence-induced transformation,  
19 we studied this process at the single-cell level. We show that within isogenic populations, all  
20 cells become naturally competent and bind exogenous DNA. In addition, we find that  
21 transformation is highly efficient and that the chromosomal location of the integration site or  
22 whether the transformed gene is encoded on the leading or lagging strand has limited  
23 influence on recombination efficiency. Indeed, we have observed multiple recombination  
24 events in single recipients in real-time. However, because of saturation of the DNA uptake  
25 and integration machinery and because a single stranded donor DNA replaces the original  
26 allele, we find that transformation efficiency has an upper threshold of approximately 50% of  
27 the population. Counterintuitively, in the presence of multiple transforming DNAs, the  
28 fraction of untransformed cells increases to more than 50%. The fixed mechanism of  
29 transformation results in a fail-safe strategy for the population as half of the population  
30 generally keeps an intact copy of the original genome. Together, this work advances our  
31 understanding of pneumococcal genome plasticity.

32

33 **Keywords:** *Streptococcus pneumoniae*, natural transformation, competence development,  
34 homologous recombination, homeologous recombination, single cell analysis, antibiotic  
35 resistance, horizontal gene transfer

36

## 37 **Introduction**

38 The opportunistic human pathogen *Streptococcus pneumoniae* (the pneumococcus) kills over  
39 a million individuals each year, despite the introduction of several vaccines targeting its  
40 capsule (Croucher et al., 2018; O'Brien et al., 2009; Prina et al., 2015). Because of its ability  
41 to take up DNA from its environment by competence activation, genes associated with  
42 capsule biosynthesis are rapidly transferred from one strain to the other thereby contributing  
43 to vaccine escape (Salvadori et al., 2019). In addition, antibiotic resistance remains a cause of  
44 concern and competence-dependent recombination plays an important role in the spread of  
45 drug resistance (Lo et al., 2019). For example, one of the main genetic sources for penicillin  
46 resistance in *S. pneumoniae* is DNA acquired from non-pathogenic *Streptococci* from the  
47 viridans group such as *S. mitis* that also lives in the human nasal and oral cavities (Bryskier,  
48 2002; Janoir et al., 1999). Consistently, antibiotic resistant pneumococci and vaccine-escape  
49 variants remain an important cause of invasive infections in spite of the introduction of the  
50 conjugate vaccines (Fenoll et al., 2018; Levy et al., 2019; Ouldali et al., 2018).

51 Although pneumococcal competence is one of the best studied bacterial regulatory  
52 system (Gómez-Mejía et al., 2018; Johnston et al., 2014; Lin and Kussell, 2017; Salvadori et  
53 al., 2019; Shanker and Federle, 2017; Straume et al., 2015; Veening and Blokesch, 2017),  
54 and pneumococcal transformation was already discovered in the early twentieth century  
55 (Avery et al., 1944; Griffith, 1928), we have a poor understanding on how competence-  
56 dependent transformation drives pneumococcal population dynamics, serotype displacement  
57 and the spread of antibiotic resistance. Importantly, horizontal gene transfer (HGT) via  
58 natural transformation is not only conserved in Streptococci but is present in many human  
59 pathogens where it promotes the spread of virulence determinants and antibiotic resistance  
60 (Brockhurst et al., 2019; Dubnau and Blokesch, 2019; Johnston et al., 2014). For this reason,

61 it is crucial to understand what the main bottlenecks are during the take-up and  
62 recombination of exogenous DNA that leads to transformed new genotypes.

63 In contrast to many other competent pathogens such as *Acinetobacter* spp. and  
64 *Neisseria meningitidis* in which competence is constitutively expressed, competence  
65 development in *S. pneumoniae* is only activated under specific conditions (Blokesch, 2016;  
66 Claverys et al., 2006). Pneumococcal competence is under control of a two-component  
67 quorum sensing system (**Figure 1**). ComC is cleaved and exported by the peptidase-  
68 containing ATP-binding cassette transporter ComAB (Chandler and Morrison, 1988;  
69 Håvarstein et al., 1995; Hui et al., 1995). Cleaved ComC autoinducer is commonly referred to  
70 as CSP, for Competence Stimulating Peptide (Alloing et al., 1996; Håvarstein et al., 1996,  
71 1995). CSP is recognized by the membrane-bound histidine kinase ComD(Håvarstein et al.,  
72 1996). Once a certain threshold level of CSP has been reached, as the culture reaches higher  
73 densities, or when other environmental factors increase local CSP concentrations (Domenech  
74 et al., 2018; Moreno-Gómez et al., 2017), ComD will autophosphorylate and transfer the  
75 phosphoryl group to the response regulator ComE (Martin et al., 2013). Phosphorylated  
76 ComE then dimerizes (Boudes et al., 2014; Sanchez et al., 2015) and binds to a specific DNA  
77 sequence (Martin et al., 2013; Pestova et al., 1996; Slager et al., 2019; Ween et al., 1999).  
78 The *comCDE* and *comAB* operons are under direct control of ComE, setting up a positive  
79 feedback loop. The genes under control of ComE are called the early *com* genes (**Figure 1**).  
80 Importantly, phosphorylated ComE also activates expression of the gene encoding the  
81 alternative sigma factor ComX. ComX activates transcription of the so-called late *com* genes,  
82 which includes the genes required for DNA uptake and integration (Campbell et al., 1998;  
83 Dagkessamanskaia et al., 2004; Luo et al., 2003; Pestova and Morrison, 1998; Slager et al.,  
84 2019) (**Figure 1**). While regulation of competence is highly diverse between naturally

85 transformable bacteria, the actual DNA uptake and integration machinery is largely  
86 conserved (Chen and Dubnau, 2004; Johnston et al., 2014).

87 During pneumococcal competence, exogenous double stranded DNA (dsDNA) is  
88 bound by a type IV-like pilus (Laurenceau et al., 2013) and subsequently sequestered to the  
89 DNA uptake machinery (**Figure 1**). Note that in contrast to some other competent bacteria,  
90 pneumococcus binds and takes up DNA of any sequence, including non-kin DNA (Mell and  
91 Redfield, 2014). Next, the dsDNA is processed into single stranded DNA (ssDNA) by the  
92 EndA nuclease and internalized through a membrane pore consisting of ComEC. Once  
93 inside, the ssDNA is bound by a competence-specific ssDNA binding protein, SsbB, and  
94 stabilized by DprA and RecA (Attaiech et al., 2011; Berge et al., 2003) (**Figure 1**). This  
95 complex undergoes homology scanning and forms a temporal hetero-duplex during strand  
96 invasion which can lead to homologous recombination (Mortier-Barrière et al., 2007). The  
97 exact details on the kinetics of this process, as well as how the heteroduplex is resolved in  
98 most cells remains elusive. The competent transformation state in *S. pneumoniae* is transient  
99 as DprA interacts with phosphorylated ComE to inhibit its activity (Mirouze et al., 2013). In  
100 addition, several key Com proteins are rapidly turned over after their synthesis, leading to a  
101 window of DNA uptake of approximately 15 min (Liu et al., 2019; Tomasz, 1966; Weng et  
102 al., 2013).

103 As most work on pneumococcal competence and transformation has been performed  
104 using bulk assays, it is unclear what the actual bottlenecks are during competence  
105 development and why one cell will be transformed whereas another one will not. Here, we  
106 have set up single cell transformation assays that allow us to quantify successful  
107 recombination events in real-time. This study provides direct evidence for several decades-  
108 old models underpinning bacterial transformation, and offers new insights that help explain

109 why competence-induced transformation is so effective in changing global pneumococcal  
110 population structures.

## 111 **Results**

### 112 **All pneumococci become competent and bind exogenous DNA**

113 To quantify pneumococcal transformation efficiency and determine at which step potential  
114 bottlenecks arise, we systematically analyzed every stage during the process: 1) competence  
115 development, 2) production of the DNA uptake machinery, 3) binding of exogenous DNA,  
116 and 4) recombination and expression of the newly acquired genetic information (**Figure 1**).  
117 While competence development in *B. subtilis* is limited to approximately 10% of the  
118 population (Maamar and Dubnau, 2005; Smits et al., 2005), up to 100% of cells within  
119 pneumococcal populations have been reported to become competent when induced with  
120 exogenously added synthetic CSP or when grown on semi-solid surfaces (Bergé et al., 2017;  
121 Domenech et al., 2018; Litt et al., 1958; Martin et al., 2010; Moreno-Gámez et al., 2017;  
122 Slager et al., 2014).

123 To quantify competence development in clonal pneumococcal populations in a  
124 systematic fashion, we constructed a set of reporters. First, we assessed the timing of both  
125 naturally induced and artificially induced competence (by the addition of synthetic CSP) at  
126 the population level utilizing a firefly luciferase reporter under the control of the late  
127 competence *ssbB* promoter (strain DLA3). Cells were grown in C+Y medium at 37°C (see  
128 Methods) and growth and luciferase activity were measured every 10 min. As expected,  
129 under these experimental conditions, the population rapidly activates *ssbB* in the presence of  
130 added CSP, while in the absence of externally added CSP, the *ssbB* promoter peaks after  
131 approximately 100 min (**Figure 2A**). To determine which fraction of the cells switch on the  
132 competence pathway, we fused the *ssbB* promoter to a fast folding yellow fluorescent protein  
133 (msfYFP) and integrated this construct at the native *ssbB* locus (strain VL2219). As shown in  
134 **Figures 2B-C**, ~97% of the population was positive for *ssbB* expression 20 minutes after  
135 addition of synthetic CSP as determined by fluorescence microscopy followed by automated

136 image analysis (see Methods for details). Importantly, spontaneous competence without the  
137 addition of synthetic CSP was reached in 92% of the population showing that almost all  
138 pneumococci, regardless of their cell length and cell cycle status become naturally competent  
139 **(Figure 2–figure supplement 1)**.

140 To test whether competent cells actually produce the machinery required for DNA  
141 uptake, we constructed translational msfYFP fusions to three essential components of the  
142 transformation machinery: ComGA (ATPase driving the DNA uptake pilus), ComEA (DNA  
143 receptor) and ComFA (ATPase driving DNA import) as the only copy integrated at their  
144 native locus. After 20 min of incubation with synthetic CSP, cells were collected for  
145 fluorescence microscopy. In line with the fraction of cells that become competent, msfYFP-  
146 ComEA, ComFA-msfYFP and ComGA-msfYFP were also expressed in the majority of the  
147 cells (~92%, ~99% and ~99%, respectively) **(Figure 2D and Figure 2–figure supplement**  
148 **2)**. A double-labeled strain (strain OVL2536: *PssbB*-mScarlet-I, ComGA-msfYFP)  
149 demonstrated that all competent cells indeed produce the DNA uptake machinery **(Figure**  
150 **2E)**.

151 Finally, to assess whether the proteins required for recombination and chromosomal  
152 integration of exogenous DNA also were expressed in the majority of the population, we  
153 constructed translational fusions to RecA and the recombination mediator protein DprA.  
154 Similar to the DNA-uptake proteins, RecA and DprA were induced in most competent cells  
155 **(Figure 2D and Figure 2–figure supplement 2)**.

156 During pneumococcal competence, the capture of extracellular DNA by the ComGC  
157 pilus is an essential step for transformation (Berge et al., 2002). To examine which proportion  
158 of cells is capable of binding DNA during competence, we labeled extracellular DNA (285  
159 bp *S. pneumoniae* DNA fragment, see Methods) fluorescently with the Cy3 dye. After  
160 induction of competence with synthetic CSP of cells mutated for EndA (to prevent



161 degradation of the exogenous DNA), ~90% of the population bound extracellular DNA as  
162 visualized by fluorescence microscopy (**Figure 2F**). Even without additional CSP,  
163 spontaneous competence also led to most cells (89.6%) binding exogenous DNA (**Figure**  
164 **2G**). As observed before in an unencapsulated R6 strain (Bergé et al., 2013), we note that  
165 also in the encapsulated serotype 2 D39V strain, DNA mainly bound to the mid-cell positions  
166 of the cell, corresponding to the localization of the DNA uptake machinery particularly the  
167 ComEA receptor (**Figure 2F** and **Figure 2–figure supplement 1**) (Bergé et al., 2013).  
168 Collectively, these data validate by direct single cell observations that pneumococcal  
169 competence development, the subsequent production of the DNA uptake and integration  
170 machinery, as well as DNA binding is highly efficient and occurs in nearly every cell of the  
171 population regardless of their cell cycle state.

172

### 173 **Real-time single-cell analysis of homeologous recombination during transformation**

174 Having established that there are no significant bottlenecks during the process of both  
175 induced and natural competence development and DNA uptake, we next set out to develop a  
176 system that allows for the direct visualization of successful recombination. Traditionally,  
177 transformation efficiencies are evaluated using antibiotic selection methods. However, these  
178 selection methods have limitations because they depend on the counting of colony forming  
179 units, which can lead to the overestimation of transformation efficiencies, due to inefficient  
180 separation of transformed from non-transformed daughter cells and nongenetic inheritance of  
181 antibiotic resistance (Dalia and Dalia, 2019; Domenech et al., 2018; Ephrussi-Taylor, 1962,  
182 1958) (**Figure 3–figure supplement 1**). In order to overcome these concerns and analyze  
183 successful recombination events during transformation at the single cell level, we developed  
184 a fluorescence-based reporter system inspired by a system previously used to observe natural  
185 transformation in *S. pneumoniae* (Bergé et al., 2013) and other bacterial species (Boonstra et

186 al., 2018; Corbinais et al., 2016; Godeux et al., 2018). To do so, we utilized a fluorescent  
187 donor strain in which the gene encoding the abundant histone-like protein HlpA (aka HU)  
188 was fused in frame with the gene encoding the red fluorescent protein mScarlet-I integrated  
189 at the native *hlpA* locus at 169° on the circular chromosome (Keller et al., 2019) (strain  
190 VL1780) (**Figure 3A**). A recipient, non-fluorescent strain was constructed (strain VL1784) in  
191 which *hlpA* was separated from *mScarlet-I* by a stop codon mutation (G>T) (**Figure 3 A–C**  
192 and **Figure 3–figure supplement 2A**, *hlpA-stop-mScarlet-I*). Upon uptake, integration and  
193 expression of exogenous transforming DNA (tDNA) containing the donor construct (intact  
194 *hlpA-mScarlet-I*), successfully transformed recipient cells will produce functional HlpA-  
195 mScarlet-I that can be quantified by fluorescence microscopy or flow cytometry (**Figure 3B**,  
196 **3C** and **Figure 3–figure supplement 2B**). As this is a recombination event between highly  
197 similar but not identical DNA (except for the SNP causing a stop codon), this is called a  
198 homeologous recombination event (Humbert et al., 1995; Petit et al., 1991). Note that this  
199 reporter system does not affect growth regardless of the presence of the stop codon and that  
200 flow cytometry analysis slightly overestimates the real transformation efficiencies due to cell  
201 chaining (**Figure 5** and **Figure 3–figure supplement 4**, see below).

202 As mScarlet-I is a fast folding red fluorescent protein (Bindels et al., 2017), this  
203 reporter system should allow for the real-time detection of homeologous recombination  
204 during transformation. To test this, we provided competent recipient cells that besides the  
205 *hlpA-stop-mScarlet-I* allele also constitutively expressed sfGFP (strain VL1832) with intact  
206 *hlpA-mScarlet-I* as donor tDNA in the presence of CSP and then performed time-lapse  
207 microscopy (see Methods for details). As shown in **Figure 3D** and **Videos 1 and 2**, recipient  
208 cells do not display any red fluorescence in the beginning and then gradually start to express  
209 red fluorescence. When quantifying the fluorescence signals and superimposing this on a cell  
210 lineage tree constructed using a set of new scripts written in BactMAP (Raaphorst et al.,

211 2020) (see Methods), it becomes apparent that the initial recipient cell already expresses  
212 HlpA-mScarlet-I right after the addition of tDNA before the first cell division as red  
213 fluorescent signals above background levels can be detected (**Figure 3E**). Notably, only half  
214 of the recipients' descendants appear to strongly express HlpA-mScarlet-I (**Figure 3E**, right  
215 lineage). Contrary, after three more divisions the non-transformed lineage no longer  
216 expresses red fluorescence (**Figure 3E**, left lineage). These results are in line with a recent  
217 study in *Vibrio cholerae* that showed a period of non-genetic inheritance in daughter cells  
218 during transformation (Dalia and Dalia, 2019). Similar observations were made when using a  
219 different transformation reporter system (**Figure 3–figure supplement 3** and **Video 3**, see  
220 below). In line with current models of transformation (Davidoff-Abelson and Dubnau, 1971;  
221 Ephrussi-Taylor and Gray, 1966; Fox and ALLEN, 1964; Gabor and Hotchkiss, 1966;  
222 LACKS, 1962; Méjean and Claverys, 1984; Piechowska and Fox, 1971), these observations  
223 are consistent with a model in which recombination occurs by direct integration of the  
224 ssDNA donor and forms a hetero-duplex. Therefore, at least one round of DNA replication  
225 and division is required to generate two different homo-duplex chromosomes in progeny cells  
226 (**Figure 3F**). The fact that we initially also observe fluorescence in the un-transformed  
227 lineage suggests that phenotypic expression derived from the acquired allele might occur  
228 prior to forming a homo-duplex. In this case, the transformed ssDNA likely replaced the  
229 antisense, noncoding strand so functional *hlpA-mScarlet-I* could be immediately transcribed  
230 after integration via RecA-directed homeologous recombination (mismatched pairing  
231 between exchanged DNA strands that are tolerated during the process of homologous  
232 recombination). Alternatively, phenotypic expression in these cells can occur if the  
233 transformed locus gets replicated, resulting in two homo-duplexes (transformed and original  
234 allele), and then transcribed before division of the cell (Dalia and Dalia, 2019).

235

236 **Single cell quantification of homeologous recombination highlights transformation**  
237 **bottlenecks**

238 The constructed system now allows us to quantify successful homeologous recombination  
239 events at the single cell level, without the bias introduced by traditional plating assays.  
240 Previously, it was shown that the concentration of donor DNA as well as the length of the  
241 homology regions strongly influences transformation efficiency (Keller et al., 2019; Lee et  
242 al., 1998). To examine recombination bottlenecks in our single cell setup, we treated our  
243 reporter recipient strain VL1784 with CSP and used intact *hlpA-mScarlet-I* donor tDNA with  
244 various lengths of homology surrounding the stop codon (fragments of 2.7 kb, 5 kb or 7 kb)  
245 at a range of different concentrations (0.0032 nM, 0.032 nM, 0.32 nM or 3.2 nM). Then, after  
246 4 h incubation in liquid medium to allow for complete homo-duplex allele formation and  
247 dilution of non-genetically inherited HlpA-mScarlet-I, cells were separated from chains by  
248 vigorously shaking on a bead beater device (see **Figure 3–figure supplement 4**). Finally,  
249 transformation efficiencies were quantified by flow-cytometry (**Figure 4A**). In line with  
250 studies using classical plating methods to assess transformation efficiencies (Keller et al.,  
251 2019; Lee et al., 1998), higher transformation frequencies were observed at higher donor  
252 DNA concentrations and with longer homology regions (**Figure 4B**). Interestingly, the  
253 frequency of transformation plateaued at ~50% regardless of the concentration of donor DNA  
254 and sequence homology length (**Figure 4B**). This is in contrast to reported transformation  
255 frequencies using traditional plating assays where transformation frequencies of higher than  
256 75% (Ephrussi-Taylor, 1958) and up to 100%(Marie et al., 2017) have been reported. This  
257 discrepancy can be explained by the lack of separation of transformed from non-transformed  
258 cells within the counted colony (**Figure 3–figure supplement 1**). To exclude the possibility  
259 that the observed limitation in transformation frequency is due to an unique feature of the  
260 *hlpA-stop-mScarlet-I* reporter, we constructed an alternative reporter cassette in which we

261 translationally fused the superfolder green fluorescent protein (sfGFP) and SPV\_1159, a  
262 nonessential small membrane protein under control of the strong constitutive P3 promoter  
263 (Keller et al., 2019; Sorg et al., 2015) cloned into the transcriptionally silent CEP locus at  
264 295° on the circular chromosome (**Figure 4C**, strain VL1786). Based on this construct, a  
265 recipient strain was constructed containing a stop codon mutation in the linker between  
266 *spv\_1159* and *sfGFP* (strain VL1788). Indeed, this *spv\_1159-sfGFP*-based transformation  
267 reporter demonstrated similar transformation characteristics as the *hlpA-mScarlet-I* reporter  
268 in time-lapse microscopy and flow-cytometry analysis (**Figure 4–figure supplement 1** and  
269 **Video 3**). The transformation frequency of the *spv\_1159-sfGFP* reporter was also dependent  
270 on donor DNA concentration and never exceeded ~50% (**Figure 4B**).

271         These data show that there is a limit on the maximum efficiency of transformation,  
272 despite the fact that most cells become competent and bind extracellular DNA (**Figure 2**) and  
273 support a model in which in general only one of the recipient allele strands is replaced by the  
274 donor DNA (Ephrussi-Taylor, 1966) (**Figure 3F**). Importantly, these experiments indicate  
275 that during competence-dependent transformation, given the donor DNA is of sufficient  
276 (homology) length and concentration (see Discussion), in principle all targeted loci can be  
277 replaced at least on one strand.

278

### 279 **Recombination with tDNA is RecA-dependent and independent of mismatch repair**

280 Previous work showed that pneumococcal genetic transformation involves the DNA  
281 mismatch repair (MMR) system, which is mediated by HexA (Claverys and Lacks, 1986),  
282 and it was suggested that certain alleles upon transformation might be particularly prone to  
283 repair (Ephrussi-Taylor, 1966). To test whether *hexA* plays a role in our reporter system, we  
284 quantified transformation efficiencies in a *hexA* mutant background. This showed no  
285 significant recombination differences compared to the wild-type background (**Figure 4–**

286 **figure supplement 2**). To test if our transformation reporter system depends on the  
287 competence-induced homologous recombinase, RecA, we depleted RecA expression level  
288 using CRISPR interference (Liu et al., 2017) (**Figure 4D**). In control strain VL3485  
289 ( $P_{lac\_dcas9}$ , without sgRNA), induction of dCas9 by IPTG did not affect the transformation  
290 efficiency with *hlpA-mScarlet-I* tDNA. However, when RecA expression was depleted by  
291 induction with IPTG in strain VL3486 ( $P_{lac\_dcas9+sgRNA-recA}$ ), the transformation  
292 frequency was decreased in an IPTG-dose dependent manner. Note that although RecA is  
293 known to be critical for optimal growth in *S. pneumoniae* (Mortier-Barrière et al., 1998), the  
294 CRISPRi depletion levels during competence did not affect bacterial growth (**Figure 4–**  
295 **figure supplement 3**). Collectively, this data show that our fluorescence-based  
296 transformation assay faithfully reflects RecA-dependent homeologous recombination events.

297

### 298 **Cell-cycle independent homeologous recombination**

299 It was previously suggested that the genomic location and the cell cycle state might influence  
300 transformation efficiency as each heteroduplex needs to be resolved to a homoduplex by  
301 DNA replication and loci located close to *oriC* will have multiple copies (Bergé et al., 2013;  
302 Dalia and Dalia, 2019; Ephrussi-Taylor and Gray, 1966; Porter and Guild, 1969). To test  
303 whether the genomic location of the recombination site and the read orientation of the newly  
304 acquired functional allele influences transformation efficiency, we introduced the *spv\_1159-*  
305 *stop-sfGFP* reporter at 4 different positions on the chromosome: on the right arm of the  
306 chromosome at 101° of the circular chromosome (*bgaA* locus), near the terminus at 169°  
307 (*hlpA* locus), on the left arm of the chromosome at 295° (*cep* locus) and near *oriC* at 359°  
308 (*comCDE* locus) (**Figures 5A and B**). In addition, *spv\_1159-stop-sfGFP* was introduced on  
309 both the positive and negative strand on the left arm of the chromosome (*cep* locus at 295°)  
310 and on the right arm of the chromosome (*bgaA* locus at 101°) (**Figure 5C**). As shown in

311 **Figure 5**, and **Figure 5–figure supplement 1**, transformation efficiencies were of a similar  
312 order across all tested loci and genetic orientations, with a maximal recombination efficiency  
313 of approximately 50%. We do note that certain loci consistently demonstrate higher  
314 transformation efficiencies than others (cf. CEP locus vs *bgaA* locus, Fig. 5-supplement 1),  
315 but no significant differences were observed regarding the orientation of the construct (see  
316 Discussion).

317 By performing time-lapse microscopy and tracking cell fates across several  
318 generations, we can, in principle, tell whether there was a preference for integration at either  
319 the leading or lagging strand (**Figure 5–figure supplement 2A**). By placing the direction of  
320 transcription of the reporter on the leading strand, RNAP will thus use the noncoding strand  
321 as template. In this situation, only if the noncoding strand is replaced by the donor DNA,  
322 fluorescence will be apparent during the first cell cycle upon transformation. If the donor  
323 DNA is integrated at the coding strand, it will take one more replication cycle before the  
324 heteroduplex is resolved and the noncoding strand contains the intact reporter and  
325 fluorescence will be observed later than in the first case (**Figure 5–figure supplement 2B**).  
326 Indeed, we can observe all different scenarios with transformants rapidly expressing HlpA-  
327 mScarlet-I (possible non-coding strand or double stranded recombinants) and cells that only  
328 express HlpA-mScarlet-I after the first cell division (possible coding strand recombinants)  
329 (**Figure 5–figure supplement 2C**). As we did not simultaneously track DNA replication in  
330 these cells, we cannot exclude the possibility that after transformation, a round of replication  
331 occurs before phenotypic expression. Nevertheless, together with the ‘bulk’ (FACS) single-  
332 cell transformation experiments described above, the time-lapse data strongly suggest that  
333 there is no preference for integration at either the leading or lagging strand and that this is an  
334 unbiased event. These findings correspond with work done in the 1960s and 1970s that  
335 showed that either strand of the incoming dsDNA is degraded randomly by EndA and either

336 strand has a similar chance of being integrated (Puyet et al., 1990). Recent work in *V.*  
337 *cholerae* demonstrated that 7% of transformation events occurred at both strands of the  
338 integration site, and it was speculated that this was because of integration of multiple donor  
339 ssDNA's replacing both the leading and lagging strand of the recipient. By recording 76  
340 single cell transformation events using time-lapse microscopy, we found 6 cases in which  
341 both daughter cells (7.8%) expressed fluorescence, suggestive of double transformation  
342 events on both strands. These findings also indirectly indicate that heteroduplex DNA can be  
343 transcribed by RNAP and do not necessarily require a round of DNA replication to form  
344 homoduplex DNA (see below and (Uptain and Chamberlin, 1997)). Together, this data show  
345 that heteroduplexes with exogenous DNA are made across all available loci regardless of  
346 reading strand or distance to *oriC*.

347

#### 348 **Direct observations of multiple recombination events in single recipients**

349 The previous experiments demonstrated that, under ideal conditions with long flanking  
350 homology regions and high DNA concentrations, all available recombination sites are  
351 transformed on at least one of the strands. Previous studies demonstrated that pneumococcal  
352 natural transformation is capable to deal with multiple donor DNAs for genetic  
353 recombination (Dalia et al., 2014; Lam et al., 2020). Also, it has been reported that the DNA-  
354 uptake and recombination process in *S. pneumoniae* is complete within 15 min (Berge et al.,  
355 2003), which is a shorter time window than the doubling time (Ephrussi-Taylor, 1966). In  
356 order to investigate the possibility of visualizing multiple recombination events, we  
357 constructed a dual reporter strain (strain VL1803), which harbors both *hlpA-stop-mScarlet-I*  
358 and *spv\_1159-stop-sfGFP* at distinct chromosomal locations (**Figure 6A**). Transformation  
359 efficiencies of this reporter strain with each single donor DNA at the saturated concentration  
360 typically reached 50% for both *hlpA-mScarlet-I* and *spv\_1159-sfGFP* as quantified by



361 microscopy (**Figures 6C-D**). When both donor DNA's were provided, double transformants  
362 were observed ( $15.6 \pm 4.4\%$ ) as well as single *hlpA-mScarlet-I* transformants ( $20.2 \pm 8.9\%$ )  
363 and single *spv\_1159-sfGFP* transformants ( $15.2 \pm 4.9\%$ ). Time-lapse imaging of competent  
364 recipient VL1803 cells with both donor DNAs clearly demonstrated that single recipients  
365 could successfully recombine both fragments (**Figures 6B, 6C, Videos 4 and 5**). We note  
366 that, on average, the fraction of non-transformed cells is close to 50% ( $48.9 \pm 9.5\%$ ),  
367 implying that each recombination event is not independent from the next or that there is an  
368 upper limit to the number of successful recombinations, otherwise we would expect the  
369 fraction of non-transformed cells to decrease with multiple donor DNAs (**Figure 6-figure**  
370 **supplement 1**). An alternative model could be that each recombination event is independent  
371 from the next but due to recombination events outside the stop codon SNP, which cannot be  
372 quantified in our setup, a reduced transformation efficiency is recorded (see Discussion).

373 To further explore whether transformation efficiency indeed has a plateau, we  
374 constructed a triple reporter strain (VL3127) that harbors *ftsZ-stop-mTurquoise2*, *spv\_1159-*  
375 *stop-msfYFP* and *hlpA-stop-mScarlet-I* at three different genomic locations (**Figure 7A**).  
376 Beside the fact that the fluorescent proteins used are spectrally distinct, every fluorescent  
377 reporter also has a specific cellular localization, facilitating automated image analyses of  
378 successful recombination. The triple reporter strain was transformed with donor tDNA  
379 fragments *ftsZ-mTurquoise2*, *spv\_1159-msfYFP* and *hlpA-mScarlet-I*. After 4 h of incubation  
380 for fluorescent protein maturation and chromosomal segregation, cells were assessed by  
381 fluorescence microscopy. As shown in **Figure 7B** and **Video 5**, multiple transformed cells  
382 with double or triple acquired fluorescence signals were readily observed. Next, we  
383 performed single cell transformation assays with strain VL3127 providing one tDNA or all  
384 three tDNAs and automatically quantified recombination efficiencies using Oufiti and  
385 BactMAP-based image analysis (Paintdakhi et al., 2016; Raaphorst et al., 2020) (**Figure 7C**).

386 In line with our previous observations, each single transformation with a saturated  
387 concentration of donor tDNA resulted in a recombination efficiency not higher than 50%  
388 (**Figure 7C**). Interestingly, every possible recombination event happened within the  
389 population: cells were observed in which just a single recombination event took place (the  
390 most occurring type of transformation), two recombination events ( $2.2 \pm 0.9\%$ ,  $4.1 \pm 2.7\%$  or  
391  $2.1 \pm 1.8\%$  for each possible combination) or even three recombination events ( $1.5 \pm 1.1\%$  of  
392 all cells). Nevertheless, more than half of the population ( $58.7 \pm 13.4\%$ ) did not show any  
393 fluorescence when simultaneously transformed with three tDNAs. These observations  
394 support a model in which each transformation is in principle independent from the next  
395 (**Figure 6–figure supplement 1**).

396

### 397 **Non-homologous DNA competes with homologous DNA to reduce transformation** 398 **efficiency**

399 The data so far show that in principle every locus in *S. pneumoniae* can be efficiently  
400 transformed to a maximum of 50% of the cells when providing tDNA at high DNA  
401 concentrations and with long homology arms. However, when providing multiple tDNAs, the  
402 untransformed fraction even increases and becomes greater than 50%. Recently, it was shown  
403 using whole genome sequencing of transformation events occurring during contact-dependent  
404 DNA uptake, that a single recipient could have at least 29 different recombination events  
405 (Cowley et al., 2018). Together, this suggests that many recombination events are likely  
406 going unnoticed in our single cell transformation assay and that these recombination events  
407 become limiting, as we can only detect successful recombination when the stop codon in our  
408 fluorescent reporter is replaced for a functional allele. If this is true, adding non-specific  
409 DNA would compete with donor tDNA resulting in reduced transformation efficiencies. To  
410 test this, we utilized homology-unrelated *E. coli*-derived DNA fragments of 5 kb with a

411 similar GC content to *S. pneumoniae* as competing donor DNA. Indeed, as shown in **Figure**  
412 **7E**, co-transformation of strain VL1803 (*hlpA-stop-mScarlet-I*, *spv\_1159-stop-sfGFP*) with  
413 *E. coli* DNA significantly reduced the transformation efficiency. When 0.32  $\mu\text{M}$  of *hlpA-*  
414 *mScarlet-I* tDNA alone was used as 7 kb donor DNA, approximately 43 % of cells were  
415 transformed. However, when 0.32  $\mu\text{M}$  of *hlpA-mScarlet-I* tDNA was given in the presence of  
416 saturating amounts of *E. coli* DNA (3.2  $\mu\text{M}$ ), only 3% of transformants were observed.  
417 Together, this data suggests that the fact that we never reach transformation efficiencies  
418 higher than 50% of the population even in the presence of multiple tDNAs, is because of  
419 saturation of the DNA uptake and integration machinery. The saturation can be caused by  
420 non-successful recombination events with donor DNA or successful recombination events  
421 with the donor DNA but outside of the stop SNP that cannot be detected in the single cell  
422 assay (**Figure 6–figure supplement 1**).

423

#### 424 **Efficient horizontal gene transfer in sessile co-cultures**

425 So far, we demonstrated that transformation is highly efficient under ideal and saturated  
426 experimental settings in which pure PCR products were used as donor DNA. Previous studies  
427 showed that natural environments also promote efficient HGT (Cowley et al., 2018;  
428 Domenech et al., 2020). To assess transformation potential under more realistic conditions,  
429 we tested transformation efficiency in a co-culture system in which two pneumococcal strains  
430 are grown together on a semi-solid surface without adding synthetic CSP (Fig. 8A; see  
431 Materials and Methods section for detail procedure). HGT in such systems is based on  
432 genomic DNA released by dead cells followed by DNA uptake and transformation of  
433 competent recipient cells (Domenech et al., 2020). Here we used strain R895 (*cmR*) as  
434 recipient and strain R4692 ( $\Delta\text{comCDE}$ , *smR*, *nov<sup>R</sup>*) as donor. Both are genetically identical  
435 unencapsulated R800 derivatives (Lefevre et al., 1979) except for a single SNP conferring

436 streptomycin (SNP in *rpsL*) or novobiocin (SNP in *gyrB*) resistance and a chloramphenicol  
437 resistance cassette present in the recipient R895 strain (Fig. 8A). Strain R4692 is also unable  
438 to activate competence due to a *comCDE* deletion so transformation can only occur in one  
439 direction from donor (R4692) to recipient (R895). R895 and R4692 were pre-cultured  
440 separately until early exponential phase and then mixed in an approximate ratio of 3:7 (see  
441 Methods). The mixture was immediately spotted on agar plates followed by incubation at  
442 37°C for 4 h to allow spontaneous competence development and transformation between  
443 strains. Cells were collected by scraping them from the plates and separated by sonication.  
444 Serial dilutions of the resulting cell suspension were plated with 4.5 µg/mL of  
445 chloramphenicol (for the recovery of the total number of viable recipient cells) and with  
446 combinations of chloramphenicol plus streptomycin (10 µg/mL) and/or novobiocin (4  
447 µg/mL) (for the recovery of the single or double transformed recipient cells). As shown in  
448 Figure 8B, also in this more realistic model, very high transformation efficiencies are  
449 obtained with a single transformation efficiency with *smR* or *nov<sup>R</sup>* of  $5.70 \times 10^{-2}$  (SD,  $5.70 \times$   
450  $10^{-2}$ ) or  $1.75 \times 10^{-2}$  (SD,  $1.68 \times 10^{-2}$ ), respectively. Double transformation efficiency with  
451 both *smR* and *nov<sup>R</sup>* was  $8.01 \times 10^{-5}$  (SD,  $9.92 \times 10^{-5}$ ), which is close to the product of the  
452 single transformation efficiencies ( $5.70 \times 10^{-2} \times 1.75 \times 10^{-2} = 9.9 \times 10^{-4}$ ). As a control, we  
453 also performed experiments using strain R4574 as donor (same genotype as R4692, but not  
454 harboring *smR* or *novR* allele), which never generated streptomycin nor novobiocin resistant  
455 R895, demonstrating that *de novo* mutations conferring resistance do not occur in this  
456 experimental setup. Together, these experiments support our single cell observations that  
457 multiple transformation events occur efficiently and independently even in more realistic  
458 settings within sessile co-cultures.

459

## 460 **Discussion**

461 The species of *Streptococcus pneumoniae* is vastly diverse with a core genome of  
462 approximately 500-1100 orthologues genes and a pan-genome of 5000-7000 orthologs (Hiller  
463 and Sá-Leão, 2018). In addition, many genes are mosaic such as several genes encoding for  
464 penicillin-binding proteins in penicillin-resistant clinical strains (Hakenbeck et al., 2012).  
465 One of the main reasons for the high level of genome plasticity and rapidly changing  
466 population dynamics is because of the highly conserved competence-based transformation  
467 system present in nearly all pneumococcal genomes (Croucher et al., 2016). Indeed, rapid  
468 spread of antibiotic resistance alleles and capsule loci have been observed among human  
469 populations under selective pressure (Chewapreecha et al., 2014). Here, we investigated the  
470 molecular basis for competence-dependent transformation at the single-cell level and show  
471 that the uptake, integration and expression of tDNA is highly efficient and is largely  
472 independent from the recipient's cell cycle stage or of the chromosomal position of the target  
473 locus. This was made possible by the setup of a sensitive real-time detection system to  
474 quantify successful homeologous recombination events. A major benefit of the here  
475 established single cell approach over traditional plate-based assays is that it allows for the  
476 detection of more subtle effects and offers better resolution to study the kinetics of the  
477 processes involved. Indeed, using the system developed here, we could visualize and quantify  
478 the recombination of three different tDNAs in single recipient cells demonstrating the  
479 efficiency of the pneumococcal transformation process.

480 Genome sequencing has indicated that up to 29 recombination events may have taken  
481 place in a single round of transformation in the same cell when selecting for the transfer of an  
482 antibiotic resistance allele in *S. pneumoniae* (Cowley et al., 2018), while 40 recombination  
483 events have been reported in *B. subtilis* (Carrasco et al., 2016). Our work now provides direct  
484 evidence that this is not an anomaly and that multiple recombination events are possible

485 during a single transformation episode, even in the absence of selection. Besides shedding  
486 light on the efficiency by which transformation can happen in *S. pneumoniae*, by imaging  
487 transformation at the single cell level, we provide direct evidence that typically only one  
488 recipient strand is replaced during competence-dependent transformation, and that there is no  
489 bias towards replacement of the leading or lagging strand. As observed in *V. cholerae*, in  
490 approximately 7% of transformants, both strands can be replaced, which is likely caused by  
491 DNA repair leading to removal of the recipient strand on the heteroduplex or by integration  
492 of multiple tDNAs (Dalia and Dalia, 2019). This is in line with predictions made using  
493 unlinked antibiotic resistance alleles (Porter and Guild, 1969). In addition, our single cell  
494 observations suggest that the replaced noncoding strand by recombination within the  
495 heteroduplex is immediately transcribed by RNAP and can lead to lineages of cells with non-  
496 genetic inherited phenotypes, or that the transformed allele is replicated and transcribed well  
497 before cell division occurs (**Figure 3**).

498 We show that any site regardless of its chromosomal position or orientation with  
499 regards to DNA replication can be efficiently transformed, although not with the exact same  
500 efficiencies (**Figure 5–figure supplement 1**). Possible explanations for local difference in  
501 recombination efficiency could be the levels of DNA compaction or transcription activity. As  
502 RecA-mediated DNA strand exchange is a reversible reaction *in vitro* (Dutreix et al., 1991;  
503 Konforti and Davis, 1990), under steady state conditions DNA strand exchange rarely  
504 reaches 50% efficiency. However, *in vivo*, when providing a single tDNA to competent cells,  
505 we readily reach 50% DNA strand exchange, again highlighting that this process is highly  
506 efficient under our experimental conditions.

507 Interestingly, we find that the percentage of untransformed cells is lower when three  
508 tDNAs are provided instead of two tDNAs (~58% vs ~49% of untransformed cells,  
509 respectively: **Figures 6 and 7**). Together with the observation that the presence of non-

510 homologous DNA reduced our observed transformation efficiency (**Figure 7E**), suggests  
511 that, in principle, every recombination event is independent of the next, but that many  
512 unsuccessful recombination events and successful recombination events outside the stop  
513 codon of our reporter are taking place and that this limits the efficiency of site-specific  
514 recombination (**Figure 6–figure supplement 1** and **Figure 7F**).

515         The overall biological implication of the limitation on competence-dependent  
516 transformation is that this mechanism ensures that in most cases one copy of the original  
517 recipient DNA remains unaltered. This might represent a fail-safe scenario so that in case a  
518 deleterious tDNA is incorporated, at least one daughter cell will survive. While this might be  
519 considered as a “spandrel” effect: a characteristic that flows inevitably from a selected  
520 phenotype but has not been selected for directly (Gould and Lewontin, 1979), being able to  
521 safely sample from a large pan-genome might contribute to the vast genome plasticity and  
522 genome diversity as observed in natural pneumococcal populations. Interestingly, we also  
523 find highly efficient HGT and independent transfer of genetic markers between a donor and  
524 recipient pneumococcal strain growing together on agar plates (Fig. 8), indicating that our  
525 single cell observations under laboratory conditions also reflect settings that depend on lysis  
526 of the donor cell and uptake of chromosomal DNA. It will be interesting to see how efficient  
527 competence-dependent transformation and horizontal gene transfer is under more realistic  
528 conditions such as within polymicrobial community within a host. Future single-cell work  
529 will allow the investigation of the localization of the enzymes involved in transformation,  
530 how strand exchange during transformation occurs and what the dynamics of the molecular  
531 machines are during DNA uptake, integration and expression of tDNA.

532

533 **Materials and Methods**

| <b>Key Resources Table</b>                                    |                          |                            |                                                                                                   |                               |
|---------------------------------------------------------------|--------------------------|----------------------------|---------------------------------------------------------------------------------------------------|-------------------------------|
| <b>Reagent type or resource (species) or</b>                  | <b>Designation</b>       | <b>Source or reference</b> | <b>Identifiers</b>                                                                                | <b>Additional information</b> |
| strain, strain background ( <i>Streptococcus pneumoniae</i> ) | Various                  | This paper                 | NCBI Taxon: 1313                                                                                  | See Supplementary file 1      |
| sequence-based reagent                                        | Various oligonucleotides | This paper (Sigma-Aldrich) | Primers for cloning                                                                               | See Supplementary file 2      |
| chemical compound, drug                                       | D-Luciferine             | Synchem                    | bc219; CAS: 115144-35-9                                                                           |                               |
| software, algorithm                                           | FIJI                     | doi: 10.1038/nmeth.2019.   | RRID:SCR_002285                                                                                   |                               |
| software, algorithm                                           | Oufti                    | doi: 10.1111/mmi.13264     | RRID:SCR_016244                                                                                   |                               |
| software, algorithm                                           | BactMAP                  | doi.org/10.1111/mmi.14417  | <a href="https://github.com/veeninglab/BactMAP">https://github.com/veeninglab/BactMAP</a>         |                               |
| software, algorithm                                           | SuperSegger              | doi: 10.1111/mmi.13486     | <a href="https://github.com/wigginslab/SuperSegger">https://github.com/wigginslab/SuperSegger</a> |                               |

534

535

536 **Bacterial strains and growth condition**



537 All pneumococcal strains used in this study are derivatives of serotype 2 *S. pneumoniae*  
538 D39V (Avery et al., 1944; Slager et al., 2018) unless specified otherwise. See Table S1 for a  
539 list of the strains used and the Supplemental information for details on the construction of the  
540 strains. *S. pneumoniae* was grown in C+Y (pH 6.8) medium at 37°C. C+Y was adapted from  
541 Adams and Roe (Adams and Roe 1945) and contained the following compounds: adenosine  
542 (68.2 mM), uridine (74.6 mM), L-asparagine (302 mM), L-cysteine (84.6 mM), L-glutamine  
543 (137 mM), L-tryptophan (26.8 mM), casein hydrolysate (4.56 g L<sup>-1</sup>), BSA (729 mg L<sup>-1</sup>),  
544 biotin (2.24 mM), nicotinic acid (4.44 mM), pyridoxine (3.10 mM), calcium pantothenate  
545 (4.59 mM), thiamin (1.73 mM), riboflavin (0.678 mM), choline (43.7 mM), CaCl<sub>2</sub> (103 mM),  
546 K<sub>2</sub>HPO<sub>4</sub> (44.5 mM), MgCl<sub>2</sub> (2.24 mM), FeSO<sub>4</sub> (1.64 mM), CuSO<sub>4</sub> (1.82 mM), ZnSO<sub>4</sub> (1.58  
547 mM), MnCl<sub>2</sub> (1.29 mM), glucose (10.1 mM), sodium pyruvate (2.48 mM), saccharose (861  
548 mM), sodium acetate (22.2 mM) and yeast extract (2.28 g L<sup>-1</sup>).

549

## 550 **Strain construction**

### 551 **Construction of *ssbB::ssbB-msfYFP* (VL2219)**

552 To construct YFP reporter for *ssbB* transcription, monomeric *yfp* (*myfp*) was  
553 introduced immediately downstream of *ssbB* at the native *ssbB* locus together with an RBS.  
554 *myfp* gene was amplified with OVL1414 and OVL1417 from genomic DNA of MK308  
555 (*parB::parB-yfp*) (Raaphorst et al., 2017). Upstream and downstream fragments were  
556 amplified with primer pairs of OVL166/OVL1196 and OVL1199/OVL167 using genomic  
557 DNA of VL599 (*ssbB::ssbB\_luc\_kanR*) (Slager et al., 2014) as template, respectively. The  
558 three resulting fragments were digested with BsmBI, ligated and transformed into *S.*  
559 *pneumoniae* D39V to obtain strain VL2219.

560

### 561 **Construction of *comGA::comGA-msfYFP* (VL2536)**

562 To construct translational fusion of *comGA* and *msfYFP*, *linker-mYFP* was amplified  
563 by PCR with OVL351/OVL690 from genomic DNA of MK308 (*parB::parB-yfp*) (Raaphorst  
564 et al., 2017). ‘Upper’ and ‘downer’ fragments containing *comGA* were amplified with primer  
565 pairs OVL391/OVL392 and OVL691/OVL394 using genomic DNA of D39V as template,  
566 respectively. The three resulting fragments were fused by overlap PCR and transformed into  
567 *S. pneumoniae* D39V. Transformed clones were screened by PCR and sequenced. Resulting  
568 strains were additionally transformed by *ssbB::ssbB\_mScarlet-I,kan* fragments, obtaining  
569 strain VL2536.

570

#### 571 **Construction of *ssbB::ssbB\_mScarlet-I, kanR* (VL2536)**

572 To construct transcriptional fusion of *ssbB* and *mScarlet-I*, *mScarlet-I* was amplified  
573 by PCR with OVL1415/OVL1418 from genomic DNA of VL1787 (*cep:spv\_1159-mScarlet-*  
574 *I, spcR*) (Keller et al., 2019). Upper and downer fragments were amplified with  
575 OVL166/OVL1168 and OVL1199/OVL167 using genomic DNA of VL599 (*ssbB::ssbB\_luc,*  
576 *kanR*) as template, respectively. The three resulting fragments were fused by Golden Gate  
577 assembly using BsmBI and transformed into *S. pneumoniae* strain, *comGA::comGA-msfYFP*.  
578 Transformed clones were selected with kanamycin and sequenced, obtaining strain VL2536.

579

#### 580 **Construction of *comEA::msfYFP-comEA* (VL2537)**

581 To construct translational fusion of *comEA* and *msfYFP*, *mYFP-linker* was amplified  
582 with OVL2029/OVL2028 from genomic DNA of VL1818 (*comEC::msfYFP-*  
583 *comEC*)(Veening lab collection). Upper and downer fragments containing *comEA* was  
584 amplified with OVL354/OVL1664 and OVL2026/OVL357 using genomic DNA of VL870  
585 (*comEA::mNeonGreen-comEA*)(Veening lab collection) as template, respectively. The three  
586 resulting fragments were fused by Golden Gate assembly using BsmBI and transformed into

587 *S. pneumoniae* D39V. Transformed clones were screened by PCR and sequenced, obtaining  
588 strain VL2537.

589

#### 590 **Construction of *comFA::comFA-msfYFP* (VL2538)**

591 To construct a translational fusion of *comGA* and *msfYFP*, *linker-mYFP* gene was  
592 amplified with OVL351/OVL690 from genomic DNA of MK308 (parB::parB-yfp)  
593 (Raaphorst et al., 2017). Upper and downer fragments containing *comFA* were amplified with  
594 OVL358/OVL521 and OVL1129/OVL361 using genomic DNA of D39V as template,  
595 respectively. The three resulting fragments were fused by overlap PCR and transformed into  
596 *S. pneumoniae* D39V. Transformed clones were screened by colony PCR and sequenced,  
597 obtaining VL2538 strain.

598

#### 599 **Construction of *dprA::dprA-msfYFP*, *eryR* (VL3355)**

600 To construct a translational fusion of *dprA* and *msfYFP*, *linker-mYFP* gene was  
601 amplified with OVL3481/OVL3482 from genomic DNA of *cep::spcR*, *P3\_spv\_1159-msfYFP*  
602 (codon-optimized) strain (Rueff AS and Veening JW, unpublished). Upper and downer  
603 fragments containing *dprA* were amplified with OVL3487/OVL3488 and  
604 OVL3489/OVL3490 using genomic DNA of D39V as template, respectively. Erythromycin  
605 resistance marker (*eryR*) was amplified OVL2549/OVL2771 using genomic DNA of  
606 *hexA::eryR* strain (Veening lab collection). The four fragments were fused by Golden Gate  
607 assembly using BsmBI and transformed into *S. pneumoniae* D39V. Transformed clones were  
608 selected by erythromycin and sequenced, obtaining strain VL3355.

609

#### 610 **Construction of *hlpA::hlpA\_mScarlet-I* (VL1780)**

611 To construct *hlpA-mScarlet-I*, the *hlpA-mScarlet-I* gene was introduced downstream  
612 of the original *hlpA* gene at its own locus as a second copy of *hlpA*. Upper and downer  
613 fragments were amplified by PCR with OVL43/OVL44 and OVL45/OVL46 using genomic  
614 DNA of MK119 (*hlpA::hlpA\_hlpA-mKate2\_cmR*) (Beilharz et al., 2015), respectively.  
615 *mScarlet-I* gene was amplified by PCR with OVL55 and OVL56 using codon-optimized  
616 synthetic *mScarlet-I* gene as template (Keller et al., 2019) . The three resulting fragments  
617 were fused by overlap PCR and transformed into *S. pneumoniae*. Transformed clone was  
618 selected by chloramphenicol, obtaining VL1780.

619

#### 620 **Construction of *hlpA::hlpA\_hlpA-stop-mScarlet-I* (VL1784, VL1832)**

621 To disrupt translation between *hlpA* and *mScarlet-I*, on *hlpA::hlpA\_hlpA-mScarlet-I*,  
622 *cmR* construct, single nucleotide mutation was introduced in domain breaking linker between  
623 *hlpA* and *mScarlet-I*. Upper or downer fragments was amplified by PCR with  
624 OVL43/OVL724 or OVL873/OVL46 using genomic DNA of VL1780 as template. The  
625 resulting fragments were fused by overlap PCR and transformed into *S. pneumoniae* D39V.  
626 Transformed clone was selected by chloramphenicol, obtaining VL1784.

627 To obtain VL1832 (*hlpA::hlpA\_hlpA-mScarlet-I, cmR; CEP::sfGFP, spcR*),  
628 *CEP::P3\_sfGFP, spcR* fragment was amplified by PCR with OVL37/OVL40 using genomic  
629 DNA of D-PEP33 (*CEP::spcR,P3\_sfGFP*) (Sorg et al., 2015). The fragment was transformed  
630 into VL1784, and transformed clone was selected by spectinomycin, obtaining VL1832.

631

#### 632 **Construction of *CEP::spcR, P3\_spv\_1159-sfGFP* (VL1785, VL1800)**

633 To construct membrane localizing sfGFP, hypothetical protein with transmembrane domain,  
634 *spv\_1159*, was translationally fused to sfGFP under the control of synthetic constitutive  
635 promoter P3 at the CEP locus of the *S. pneumoniae* chromosome. Upper and downer

636 fragments were amplified by PCR with OVL37/OVL631 and OVL634/OVL40 using  
637 genomic DNA of VL430 (*CEP::spcR,P3\_spv\_1159-sfGFP*) (Keller et al., 2019), respectively.  
638 *spv\_1159* was amplified by PCR with OVL632 and OVL633 using genomic DNA of D39V.  
639 The three resulting fragments were fused by Golden Gate assembly with BsmBI and  
640 transformed into *S. pneumoniae* D39V. Transformants were selected on Colombia agar plates  
641 containing spectinomycin, obtaining strain VL1785.

642 To obtain a dual labeled strain, the *CEP::spcR,P3\_spv\_1159-sfGFP* fragment was  
643 amplified by PCR with OVL37/OVL40 using genomic DNA of VL1785, and transformed  
644 into VL1780 to obtain VL1800 (*hlpA::hlpA\_hlpA-mScarlet-I,cmR; CEP::spcR,*  
645 *P3\_spv\_1159-sfGFP*).

646

#### 647 **Construction of *CEP::spcR, P3\_spv\_1159-stop-sfGFP* (VL1788, VL1803, VL1930)**

648 To disrupt translation between *spv\_1159* and *sfGFP*, on the *CEP::spcR,P3\_spv\_1159-sfGFP*  
649 construct, a single nucleotide mutation was introduced in domain breaking linker between  
650 *spv\_1159* and *sfGFP*. Upper and downer fragments were amplified by PCR with  
651 OVL37/OVL724 or OVL723/OVL40 using genomic DNA of VL1785 as template. The  
652 resulting fragments were fused by overlap PCR and transformed into *S. pneumoniae* D39V.  
653 Transformants were selected by chloramphenicol, obtaining strain VL1786.

654 To obtain dual reporter strain VL1800, the *CEP::spcR,P3\_spv\_1159-stop-sfGFP*  
655 fragment was amplified by PCR with OVL37/40 using genomic DNA of VL1786, and  
656 transformed into VL1784 to obtain VL1800 (*hlpA::hlpA\_hlpA-stop-mScarlet-I,cmR;*  
657 *CEP::spcR, P3\_spv\_1159-stop-sfGFP*)).

658

#### 659 **Construction of *hlpA::spcR, P3\_spv\_1159-sfGFP* (VL3096)**

660 To insert the *spcR*, *P3\_spv\_1159-sfGFP* construct downstream of the *hlpA* locus, *spcR*,  
661 *P3\_spv\_1159-sfGFP* was amplified by PCR with OVL2855/OVL2856 using genomic DNA  
662 of VL1785 (*CEP::spcR,P3\_spv\_1159-sfGFP*) as template. Upper and downer fragments  
663 were amplified by PCR with OVL2868/OVL2859 and OVL2860/OVL2869 using genomic  
664 DNA of D39V, respectively. The three resulting fragments were fused by Golden Gate  
665 assembly with BsmBI and transformed into *S. pneumoniae* D39V. Transformants were  
666 selected by spectinomycin, obtaining strain VL3096.

667

#### 668 **Construction of *hlpA::spcR*, *P3\_spv\_1159-stop-sfGFP* (VL3097)**

669 To disrupt translation between *spv\_1159* and *sfGFP*, on *hlpA::spcR*, *P3\_spv\_1159-*  
670 *sfGFP* construct, single nucleotide mutation was introduced in domain breaking linker  
671 between *spv\_1159* and *sfGFP*. Upper or downer fragments were amplified by PCR with  
672 OVL2868/OVL724 or OVL723/OVL2869 using genomic DNA of VL3096 as a template.  
673 The resulting fragments were fused by overlap PCR and transformed into *S. pneumoniae*  
674 D39V. Transformants were selected on Colombia agar plates containing chloramphenicol,  
675 obtaining VL3097.

676

#### 677 **Construction of *comCDE::spcR*, *P3\_spv\_1159-sfGFP* (VL3098)**

678 To insert the *spcR*, *P3\_spv\_1159-sfGFP* construct right downstream of the *comCDE* locus,  
679 *spcR*, *P3\_spv\_1159-sfGFP* was amplified by PCR with OVL2855/OVL2856 using genomic  
680 DNA of VL1785 (*CEP::spcR*, *P3\_spv\_1159-sfGFP*) as template. Upper and downer  
681 fragments were amplified by PCR with OVL371/OVL2861 and OVL2862/OVL2870 using  
682 genomic DNA of D39V, respectively. The three resulting fragments were fused by Golden  
683 Gate assembly with BsmBI and transformed into *S. pneumoniae* D39V. Transformed clone  
684 was selected by spectinomycin, obtaining VL3098.

685

686 **Construction of *comCDE::spcR, P3\_spv\_1159-stop-sfGFP* (VL3099)**

687 To disrupt translation between *spv\_1159* and *sfGFP*, on  
688 *comCDE::spcR, P3\_spv\_1159-sfGFP* construct, single nucleotide mutation was introduced in  
689 domain breaking linker between *spv\_1159* and *sfGFP*. Upper or downer fragments were  
690 amplified by PCR with primers OVL371/OVL724 or OVL723/OVL2870 using genomic  
691 DNA of VL3096 as template. The resulting fragments were fused by overlap PCR and  
692 transformed into *S. pneumoniae* D39V. Transformants were selected on Colombia agar plates  
693 containing, obtaining VL3099.

694

695 **Construction of *bgaA::spcR, P3\_spv\_1159-sfGFP* (VL3100, VL3348)**

696 To insert the *spcR, P3\_spv\_1159-sfGFP* construct right at the *bgaA* locus, *spcR*,  
697 *P3\_spv\_1159-sfGFP* was amplified by PCR with OVL2855/OVL2856 using genomic DNA  
698 of VL1785 (*CEP::spcR, P3\_spv\_1159-sfGFP*) as template. Upper and downer fragments  
699 were amplified by PCR with OVL1312/OVL2863 and OVL2864/OVL2871 using genomic  
700 DNA of D39V, respectively. The three resulting fragments were fused by Golden Gate  
701 assembly with BsmBI and transformed into *S. pneumoniae* D39V. Transformed clone was  
702 selected by spectinomycin, obtaining VL3100.

703 To obtain strain VL3348, the *bgaA::spcR, P3\_spv\_1159-sfGFP* fragment was  
704 amplified by PCR with OVL1312/2871 using genomic DNA of VL3100, and transformed  
705 into VL1780 to obtain VL3348 (*hlpA::hlpA\_hlpA--mScarlet-I,cmR; bgaA::spcR*,  
706 *P3\_spv\_1159-sfGFP*)).

707

708 **Construction of *bgaA::spcR, P3\_spv\_1159-stop-sfGFP* (VL3101, VL3349)**

709 To disrupt translation between *spv\_1159* and *sfGFP*, on *bgaA::spcR*, *P3\_spv\_1159-sfGFP*  
710 construct, single nucleotide mutation was introduced in domain breaking linker between  
711 *spv\_1159* and *sfGFP*. Upper or downer fragments was amplified by PCR with  
712 OVL1312/OVL724 or OVL723/OVL2871 using genomic DNA of VL3096 as template. The  
713 resulting fragments were fused each other by overlap PCR and transformed into *S.*  
714 *pneumoniae* D39V. Transformed clone was selected by chloramphenicol, obtaining VL3101.

715 To obtain dual reporter strain, the *bgaA::spcR*, *P3\_spv\_1159-stop-sfGFP* fragment  
716 was amplified by PCR with OVL1312/2871 using genomic DNA of VL1786, and  
717 transformed into VL1784 to obtain VL3349 (*hlpA::hlpA\_hlpA-stop-mScarlet-I*, *cmR*;  
718 *bgaA::spcR*, *P3\_spv\_1159-stop-sfGFP*).

719

#### 720 **Construction of *CEP::spcR,P3\_spv\_1159-sfGFP(inverted)* (VL3346)**

721 To re-introduce *spcR*, *P3\_spv\_1159-sfGFP* in inverted direction at *CEP* locus, *spcR*,  
722 *P3\_spv\_1159-sfGFP* was amplified by PCR with OVL3358/OVL3359 using genomic DNA  
723 of VL1785 (*CEP::spcR*, *P3\_spv\_1159-sfGFP*) as template. Upper and downer fragments  
724 were amplified by PCR with OVL37/OVL3390 and OVL3391/OVL40 using genomic DNA  
725 of D39V, respectively. The three resulting fragments were fused by Golden Gate assembly  
726 with BsmBI and transformed into *S. pneumoniae* VL1784. Transformed clone was selected  
727 by spectinomycin, obtaining VL3346 (*hlpA::hlpA\_hlpA-mScarlet-I,cmR*; *CEP::spcR*,  
728 *P3\_spv\_1159-sfGFP(inverted)*).

729

#### 730 **Construction of *CEP::spcR, P3\_spv\_1159-stop-sfGFP(inverted)* (VL3347)**

731 To disrupt translation between *spv\_1159* and *sfGFP*, on *CEP::spcR*, *P3\_spv\_1159-*  
732 *sfGFP(inverted)* construct, single nucleotide mutation was introduced in domain breaking  
733 linker between *spv\_1159* and *sfGFP*. Upper or downer fragments was amplified by PCR with



734 OVL37/OVL723 or OVL724/OVL40 using genomic DNA of VL3346 as template. The  
735 resulting fragments were fused each other by overlap PCR and transformed into *S.*  
736 *pneumoniae* VL1784. Transformed clone was selected by chloramphenicol, obtaining  
737 VL3347 (*hlpA::hlpA\_hlpA-stop-mScarlet-I,cmR*; *CEP::spcR,P3\_spv\_1159-stop-*  
738 *sfGFP(inverted)*).

739

#### 740 **Construction of *bgaA::spcR, P3\_spv\_1159-sfGFP(inverted)* (VL3350)**

741 To re-introduce *spcR, P3\_spv\_1159-sfGFP* in inverted direction at *CEP* locus, *spcR,*  
742 *P3\_spv\_1159-sfGFP* was amplified by PCR with OVL3358/OVL3359 using genomic DNA  
743 of VL1785 (*CEP::spcR, P3\_spv\_1159-sfGFP*) as template. Upper and downer fragments  
744 were amplified by PCR with OVL1312/OVL2863 and OVL2864/OVL2871 using genomic  
745 DNA of D39V, respectively. The three resulting fragments were fused by Golden Gate  
746 assembly with BsmBI and transformed into *S. pneumoniae* VL1784. Transformed clone was  
747 selected by spectinomycin, obtaining VL3346 (*hlpA::hlpA\_hlpA-mScarlet-I,cmR ;CEP::spcR,*  
748 *P3\_spv\_1159-sfGFP(inverted)*).

749

#### 750 **Construction of *bgaA::spcR, P3\_spv\_1159-stop-sfGFP(inverted)* (VL3351)**

751 To disrupt translation between *spv\_1159* and *sfGFP*, on *bgaA::spcR, P3\_spv\_1159-*  
752 *sfGFP(inverted)* construct, single nucleotide mutation was introduced in domain breaking  
753 linker between *spv\_1159* and *sfGFP*. Upper or downer fragments was amplified by PCR with  
754 OVL1312/OVL723 or OVL724/OVL2871 using genomic DNA of VL3346 as template. The  
755 resulting fragments were fused each other by overlap PCR and transformed into *S.*  
756 *pneumoniae* VL1784. Transformed clone was selected by chloramphenicol, obtaining  
757 VL3347 (*hlpA::hlpA\_hlpA-stop-mScarlet-I, cmR*; *CEP::spcR, P3\_spv\_1159-stop-*  
758 *sfGFP(inverted)*).

759

760 **Construction of *ftsZ-mTurquoise2* (VL3126)**

761 To construct a triple labeled strain, upper or downer fragments was amplified with primer  
762 pair OVL452/OVL1921 or OVL1922/OVL1441 using genomic DNA of *ftsZ::ftsZ-*  
763 *mTurquoise2*, *spcR* strain (Gallay C and Veening JW, unpublished) as template. These  
764 fragments were fused by overlap PCR to remove the *spcR* gene. The fused fragment was  
765 used for transformation in D39V and spectinomycin-susceptible clone was selected.

766 To construct triple labeled strain, *hlpA::hlpA\_hlpA-mScarlet-I,cmR* was amplified  
767 with OVL43/OVL46 using genomic DNA of VL1780 and *cep::spcR,P3\_spv\_1159-msfYFP*  
768 was amplified with OVL37/OVL40 using genomic DNA of *cep::spcR,P3\_spv\_1159-msfYFP*  
769 (*codon-optimized*) strain (Rueff AS and Veening JW, unpublished). These two DNA  
770 fragments were transformed into the strain (*ftsZ::ftsZ-mTurquoise2*) and transformed clone  
771 was selected by chloramphenicol and spectinomycin, obtaining triple labeled strain VL3126  
772 (*ftsZ::ftsZ-mTurquoise2; hlpA::hlpA\_hlpA-mScarlet-I,cmR; cep::spcR, P3\_spv\_1159-*  
773 *msfYFP*).

774

775 **Construction of *ftsZ-stop-mTurquoise2* (VL3127)**

776 To construct triple reporter strain, upper or downer fragments was amplified with primer pair  
777 of OVL452/OVL724 or OVL723/OVL1441 using genomic DNA of VL3126 as template.  
778 These fragments were fused each other by overlap PCR to introduce stop codon between *ftsZ*  
779 and *mTurquoise2*. The fused fragment *ftsZ::ftsZ-stop-mTurquoise2* was transformed in  
780 *ftsZ::ftsZ-mTurquoise2* strain and clone that lost mTurquoise2 fluorescence was screened by  
781 fluorescence microscopy.

782 To disrupt translation between *spv\_1159* and *msfYFP*, on *CEP::spcR, P3\_spv\_1159-*  
783 *msfYFP* construct, single nucleotide mutation was introduced in domain breaking linker

784 between *spv\_1159* and *msfYFP*. Upper or downer fragments was amplified by PCR with  
785 OVL37/OVL724 or OVL723/OVL40 using genomic DNA of VL3126 as template. While,  
786 *hlpA::hlpA-stop-mScarlet-I*, *cmR* was amplified by PCR with OVL43/OVL46 using  
787 VL1784. The resulting two fragments were transformed into *ftsZ::ftsZ-stop-mTurquoise2* and  
788 transformed clone was selected by chloramphenicol and spectinomycin, obtaining VL3128.

789

#### 790 **Construction of *recA::recA-mCherry*, *eryR* (VL361)**

791 *mCherry-eryR* was amplified with RR93/RR94 using VL371 (RR27) (Raaphorst et al., 2017).  
792 Upper or downer fragments was amplified by PCR with RR91/RR92 or RR93/RR94 using  
793 genomic DNA of D39V as template. The three fragments were assembled using Gibson one-  
794 step ISO assembly (Gibson, 2011) and transformed into D39V. Transformed clone was  
795 selected by erythromycin.

796

#### 797 **Construction of R4692 ( $\Delta comCDE::trmpR$ ; *strR*; *rifR*; *novR*)**

798 R304 (*strR*; *rifR*; *novR*) (Chastanet et al., 2001) strain was transformed with genomic DNA  
799 from R4574 ( $\Delta comCDE::trmpR$ ) (Johnston et al., 2020) and was selected by trimethoprim,  
800 obtaining R4692.

801

#### 802 **Luminescence assays of competence development**

803 To monitor competence development, strains containing a transcriptional fusion of the firefly  
804 *luc* gene with the late competence gene *ssbB* were used. Cells were pre-cultured in C+Y (pH  
805 6.8) at 37°C to an OD595 nm of 0.2. Right before inoculation, cells were collected by  
806 centrifugation (6,000 xg for 3 minutes) and resuspended in fresh C+Y at pH 7.9, which is  
807 permissive for natural competence. Luciferase assays were performed in 96-wells plates with  
808 a Tecan Infinite 200 PRO illuminometer (TECAN) at 37°C as described before (Slager et al.,

809 2014). Luciferin was added at a concentration of 0.45 mg/mL to monitor competence by  
810 means of luciferase activity. Optical density (OD<sub>595nm</sub>) and luminescence (relative  
811 luminescence units [RLU]) were measured every 10 minutes.

812

### 813 **Phase contrast and fluorescence microscopy**

814 Microscopy acquisition was performed using a Leica DMI8 microscope with a sCMOS  
815 DFC9000 (Leica) camera and a SOLA light engine (Lumencor) and a 100x/1.40 oil-  
816 immersion objective. Images were primarily processed using LAS X (Leica). For snap shot  
817 imaging, cells were concentrated 10x by centrifugation (6,000 xg, 3 min) and 0.5 µl of cells  
818 were spotted on 1% agarose/PBS. For time-lapse microscopy, a semi-solid growth surface  
819 was prepared with C+Y (pH 7.9) containing 1% agarose in Gene Frame (Thermo Fischer)  
820 (Jong et al., 2011). As C+Y medium has some background fluorescence, the C+Y agar pad  
821 was pre-exposed on a UV illuminator for 1 min to bleach the background fluorescence.

822 Phase contrast images were acquired using transmission light with 100 ms exposure  
823 for snap shot and 50 ms exposure for time-lapse. Fluorescence was usually acquired with 700  
824 ms exposure for snap shot, and 200–500 ms exposure (17–30% of power from Sola light  
825 engine) for time-lapse using filter settings described below. Time-lapses images were  
826 recorded by taking images every 5 or 10 minutes.

827 Leica DMI8 filters set used are as followed: mTurquoise2 (Ex: 430/24 nm Chroma,  
828 BS: LP 455 Leica 11536022, Em: 470/24 nm Chroma ET470/24 nm or Ex: 430/29 nm  
829 Chroma, BS: 455 (450–490) Chroma 69008, Em: 470/26), sfGFP (Ex: 470/40 nm Chroma  
830 ET470/40x, BS: LP 498 Leica 11536022, Em: 520/40 nm Chroma ET520/40m), msfYFP  
831 (Ex: 500/20 nm Chroma ET500/20x, BS: LP 520 Leica 11536022, Em: 535/30 nm Chroma  
832 ET535/30m or Ex:495/25 nm Chroma ET495/25x, BS520 (510–560) Chroma 69008, Em:  
833 533/30 nm) and mScarlet-I (Chroma 49017, Ex: 560/40 nm, BS: LP 590 nm, Em: LP 590 nm

834 or Ex: 575/35 nm, BS: 595 (590–670) nm Chroma 69008, Em: 635/70 nm). Microscopy  
835 image are available at the BioImages Archive (accession S-BIAD26).

836

### 837 **Quantitative image analysis**

838 For quantitative image analysis of single cells, obtained microscopic images were processed  
839 by FIJI software (Schindelin et al., 2012). Single cell segmentation and fluorescence signal  
840 intensity measurement were performed by Oufi (Paintdakhi et al., 2016). The generated  
841 celllist files were analyzed in R (<https://www.r-project.org/>), using BactMAP (Raaphorst et  
842 al., 2020) for statistical analysis and visualization. After celllist file were imported into R,  
843 cells were filtered between 0.7–1.2  $\mu\text{m}$  in width length to exclude false events derived from  
844 noise or miss-segmentation. Threshold of fluorescence of signal intensity was defined based  
845 on negative or positive control for each experiment setting. >500 cells were analyzed at least  
846 for each replicate. To exclude the possibility of overlap in detection of fluorescence  
847 (particularly mTurquoise2/msfYFP and msfYFP/mScarlet-I) in multi-fragments  
848 transformation, we ensured that single transformation experiments did not show any signal in  
849 the other channels and this was confirmed by looking at the protein localization patterns.

850 For generating cell lineage trees from time-lapse imaging, the stacked time-lapse  
851 images were processed by FIJI and stabilization between time frames was performed by  
852 Huygens (Scientific volume imaging). Single cell segmentation and fluorescence intensity  
853 acquisition were performed by SuperSegger (Stylianidou et al., 2016). The resultant data set  
854 was analyzed using BactMAP (Raaphorst et al., 2020).

855

### 856 **DNA binding assays**

857 Analysis of DNA binding was performed in an *endA* mutant background (strain D39V  
858 *ssbB::luc (cam) endA::kan*), to favor accumulation of transforming DNA at the surface of

859 competent cells. In wild type, *endA*<sup>+</sup> cells, surface-bound DNA is immediately internalized  
860 into the cytosol or degraded otherwise, which makes surface-bound DNA accumulation hard  
861 to be visualized as previously shown (Bergé et al., 2013). After gently thawing stock cultures,  
862 aliquots were inoculated at an OD550 of 0.006 in C+Y medium, supplemented with 20 mM  
863 HCl to prevent spontaneous competence development, and grown at 37°C to an OD550 of  
864 0.3. These precultures were inoculated (1/50) in C+Y medium (pH 7.8) and incubated at  
865 37°C. In these conditions, competence developed spontaneously and reached its maximal  
866 level in the population after 55-60 minutes. At 35 minutes, 1 ml samples were collected and  
867 induced, or not, with synthetic CSP (50 ng/ml). At 50 minutes, these samples were incubated  
868 for 5 minutes with 10 ng of a 285 bp DNA fragment labelled with a Cy3 fluorophore at its 5'  
869 extremities (Bergé et al., 2013). Cells were pelleted (3,000 xg, 3 min), washed twice in 500µl  
870 C+Y, and resuspended in 20 to 50 µL C+Y medium before microscopy. Two µl of this  
871 suspension was spotted on a microscope slide containing a slab of 1.2% C+Y agarose as  
872 described previously (Jong et al., 2011).

873 Phase contrast and fluorescence microscopy were performed with an automated  
874 inverted epifluorescence microscope Nikon Ti-E/B, a phase contrast objective (CFI Plan Apo  
875 Lambda DM 100X, NA1.45), a Semrock filter set for Cy3 (Ex: 531BP40; DM: 562; Em:  
876 593BP40), a LED light source (Spectra X Light Engine, Lumencor), and a sCMOS camera  
877 (Neo sCMOS, Andor). Images were captured and processed using the Nis-Elements AR  
878 software (Nikon). Cy3 fluorescence images were false colored red and overlaid on phase  
879 contrast images. Overlaid images were further analyzed to quantify the number of cells  
880 bound with Cy3-labelled DNA. Single cells were first detected using the threshold command  
881 from Nis-Elements and cells bound or not to DNA were manually classified using the  
882 taxonomy tool.

883

## 884 **Evaluation of transformation frequency using the fluorescence reporter**

885 To quantify the efficiency of transformation with tDNA fragments, reporter cells were pre-  
886 cultured in C+Y (pH 6.8) at 37°C to an OD<sub>595</sub> nm of 0.2. Right before inoculation, cells  
887 were collected by centrifugation (6,000 xg for 3 minutes) and resuspended in fresh C+Y at  
888 pH 7.9, adjusted to OD=0.1. Competence was induced by incubation in the presence of CSP  
889 (100 ng/μl) at 37°C for 10 min and then donor tDNA was provided the indicated  
890 concentration. After an additional 4 h of incubation at 37°C for complete cell division to form  
891 homo-duplex and maturation of fluorescence proteins, cells were placed on ice to stop cell  
892 growth and were directly analyzed by fluorescence microscopy or flow-cytometry.

893 Donor tDNA was designed in such a way that the single nucleotide mutation is  
894 positioned in the middle of the entire fragment so that the left and right homology arms are of  
895 equal length. Preparation of the tDNA was performed by PCR using primer pairs indicated in  
896 Supplementary table S2, using the corresponding parent strain as template. For competition  
897 experiments using unrelated tDNA as shown in **Figure 7**, a DNA fragment that has no  
898 homology to the pneumococcal genome but is of equal size (5 kb) and GC content (~40% of  
899 GC) to the *hlpA-mScarlet-I/spv\_1159-sfGFP* fragments, was amplified by PCR from  
900 genomic DNA of *E. coli* DH5alpha (Hanahan et al., 1991), using primers OVL3527 and  
901 OVL3528.

902

## 903 **Flow-cytometry analysis**

904 Cells were collected by centrifugation (6,000 xg for 3 minutes) and resuspended in filtered  
905 (0.22 μm) PBS adjusted to a cell density of approximately  $1.0 \times 10^5 \sim 1.0 \times 10^6$  cells/mL. As  
906 encapsulated *S. pneumoniae* D39V cells tend to form chains particularly during competence,  
907 we separated cells by bead beating (BioSpec) without any glass beads. At least  $>1.0 \times 10^4$   
908 events were analyzed on a Novocyte flow cytometer (ACEA bioscience) harboring 488 nm

909 and 561 nm lasers. Fluorescence filters used were: FITC (Ex: 488nm, Em: 530/45nm) for  
910 sfGFP and PE.Texas.Red (Ex: 561 nm, Em: 615/20 nm) for mScarlet-I. Obtained raw data  
911 were imported and analyzed in R. Non-bacterial particles were excluded by gating the FSC  
912 and SSC values. A threshold was determined so that positive events counted in a negative  
913 control strain were <1% and validated with both negative (no DNA control) and positive  
914 (parent strain without the point mutation) control for each experimental setting.

915

### 916 **Transformation assays between *S. pneumoniae* strains**

917 We used strain R895 as a recipient strain and R4692 and R4574 as donor strains. R895 is a  
918 naturally competent derivative of unencapsulated strain R6 and carries a chloramphenicol  
919 resistance marker (Chastanet et al., 2001). R4692 is unable to develop competence and  
920 carries point mutations conferring resistance to streptomycin, novobiocin and rifampicin.  
921 R4574 was used as a negative control donor strain. All strains were pre-cultured in C+Y (pH  
922 6.8) at 37°C to an OD<sub>550 nm</sub> of 0.1. Cells were then collected by centrifugation (6,000 xg  
923 for 3 minutes) and concentrated 3-fold in fresh C+Y at pH 7.9. Mixed inoculates containing  
924 30 µL of donor strain R895 and 70 µL of recipient strain (R4574 or R4692) were  
925 subsequently spotted onto Petri dishes containing 3% horse blood CAT-agar (1% agar)  
926 supplemented with catalase (300 U/ mL). Different ratios of donor and recipient were tested  
927 (1:1, 1:10 and 3:7) and a 3:7 ratio showed the least HGT variation across experiments. After  
928 4 hours incubation at 37°C, cells were scraped off the plates and separated by sonication in an  
929 ultrasonic cleaner (90 sec, 50 Hz). Serial dilutions were plated with 4.5 µg/mL of  
930 chloramphenicol and with combinations of chloramphenicol plus streptomycin (10 µg/mL)  
931 and/or novobiocin (4 µg/mL). Transformation efficiency was calculated by dividing the  
932 number of transformants by the total number of viable recipient count. Four independent  
933 biological replicates were performed.



934

935

936 **Author Contributions and Notes**

937 J.K. and J.W.V. designed research, J.K., N.C., R.v.R. and G.C. performed research, J.K. and  
938 N.C. analyzed data; and J.K. P.P. and J.W.V. wrote the paper.

939 The authors declare no conflict of interest.

940 This article contains supporting information online.

941

942 **Acknowledgments**

943 We thank Jelle Slager and Arnau Domenech for critically reading this manuscript, two  
944 anonymous referees, Juan Carlos Alonso and all members of the Veening lab for stimulating  
945 discussions. Work in the Veening lab is supported by the Swiss National Science Foundation  
946 (SNSF) (project grant 31003A\_172861), a JPIAMR grant (40AR40\_185533) from SNSF and  
947 ERC consolidator grant 771534-PneumoCaTChER. Work in the Polard lab is supported by  
948 the Centre National de la Recherche Scientifique, Université Paul Sabatier, and the Agence  
949 Nationale de la Recherche (grants ANR-10-BLAN-1331 and ANR-17-CE13-0031). Jun  
950 Kurushima was supported by The Naito Foundation.

951

952 **Figure legends**

953 **Figure 1. Regulation of pneumococcal competence and transformation.**

954 Schematic overview showing representative competence-related genes involved in  
955 pneumococcal transformation. Competence development is initiated by activation of the early  
956 *com* genes (shown in blue area). ComAB exports ComC and processes it into the competence  
957 stimulating peptide (CSP). The two-component system ComDE recognizes CSP and  
958 positively regulates the early *com* genes. Subsequently, the alternative sigma factor ComX,  
959 activates late *com* gene expression (shown in orange area). ComGA, GB and GC are  
960 assembled to form the DNA-binding pilus. EndA is the endonuclease that cleaves dsDNA  
961 into ssDNA. ComEA, ComEC, ComFA and ComFC form the ssDNA uptake channel.  
962 Internalized foreign ssDNA is protected by SsbB and DprA. DprA ensures the loading of  
963 RecA on single strand tDNA to form a presynaptic filament and the resulting DNA scanning  
964 complex is capable of homologous (or homeologous) recombination with the recipient  
965 chromosome.

966

967 **Figure 2. Single cell analysis of competence activation and DNA binding**

968 **A.** Kinetics of bacterial growth and competence development. Growth curves (top) and OD-  
969 normalized bioluminescence activity (bottom) of strain DLA3 (*PssbB-luc*) in the presence  
970 (orange) or absence (grey) of CSP. Arrow indicates the moment after addition of CSP (0  
971 min). Lines and confidence bands represent means of three replicates and SD, respectively.

972 **B.** Single cell imaging of fluorescence competence reporter cells. VL2219 (*PssbB- msfYFP*)  
973 was treated with (top, grey frame) or without (bottom, orange frame) CSP for 20 min and  
974 analyzed by fluorescence microscopy. Images are overlays of phase contrast and YFP signal.  
975 Scale bar: 20  $\mu$ m. **C.** Quantification of the imaging. Scatter plots of single cell YFP signal  
976 intensity (y axis) against cell length (x axis), based on microscopy images. Red line indicates

977 the threshold used to score YFP positive cells. Proportion of positive cells (%) is shown. **D.**  
978 Quantification of cells expressing the transformation machinery. Fluorescence signal  
979 intensity for indicated strain harboring *comGA-msfYFP* (VL2536), *msfYFP-comEA*  
980 (VL2537), *comFA-msfYFP* (VL2538) or *dprA-msfYFP* (VL3355) treated with (orange) or  
981 without (grey) CSP for 20 min. Red line indicates threshold for YFP positive cells.  
982 Proportion of positive cells (%) is shown. **E.** Correlation between competence activation and  
983 ComGA production. VL2536 (*comGA-msfYFP*, *PssbB\_mScarlet-I*) was incubated with or  
984 without CSP. Scatter plot of single cell YFP signal intensity (translational fusion of ComGA)  
985 against mScarlet-I signal (transcriptional fusion to *ssbB*). Red line indicates threshold used.  
986 Proportion of positive cells (%) is shown on each plot. **F and G.** DNA binding analysis using  
987 Cy3-labeled DNA added to induced- or spontaneous competent cells. **f.** Representative image  
988 of Cy3-labeled DNA-bound TD290 (*ssbB\_luc*,  $\Delta endA$ ) cells. Scale bar: 2  $\mu$ m. **G.**  
989 Quantification of microscopy images of Cy3-labeled DNA bound D39V cells. Bacteria were  
990 treated with CSP for 20 min to induce competence in C+Y (pH 7.9). Efficiency of  
991 spontaneous competent cells (no CSP) is also represented. Total of 6027 cells (without added  
992 CSP) and 3082 cells (with CSP) were collected over three independent experiments.

993

994 **Figure 3. Development of a fluorescence-based real-time reporter for genetic**  
995 **transformation in *S. pneumoniae***

996 **A.** Schematic representation of the reporter system. *hlpA-mScarlet-I* was inserted  
997 downstream of the native *hlpA* locus as a second copy (strain VL1780), resulting in red-  
998 fluorescently marked nucleoids as shown by fluorescence microscopy (Left: phase contrast,  
999 middle: red fluorescence, right: overlay, scale bar: 4  $\mu$ m). A single nucleotide mutation  
1000 generating a stop codon was introduced in the linker sequence between *hlpA* and *mScarlet-I*,

1001 resulting in non-fluorescent strain VL1784 (*hlpA-stop-mScarlet-I*). **B.** Flow-cytometry  
1002 measurement of *hlpA-mScarlet-I* signal of VL1780 (*hlpA-mScarlet-I*, white) and VL1784  
1003 (*hlpA-stop-mScarlet-I*, grey). **C.** CSP-treated (right) or untreated (left) VL1784 was provided  
1004 with tDNA (*hlpA-mScarlet-I*) and analyzed by fluorescence microscopy after 4 h of  
1005 incubation. Scale bar, 20  $\mu$ m. **D.** Time-lapse visualization of transformation with *hlpA-*  
1006 *mScarlet-I* in VL1832 (VL1784+constitutively expressing cytoplasmic sfGFP). VL1832 was  
1007 treated with CSP for 10 min, tDNA added (*hlpA-mScarlet-I*) for 10 min, and then spotted on  
1008 C+Y agarose pad to start time-lapse imaging with a 5 min interval. Signal of constitutively  
1009 expressed cytoplasmic sfGFP (top, green in the overlay) was used for cell segmentation in  
1010 image analysis. Successfully transformed cells were detected by expression of HlpA-  
1011 mScarlet-I (middle, red in the overlay). Scale bar, 10  $\mu$ m. Also see **Video 1**. **E.** Cell lineage  
1012 tree with superimposed fluorescence intensity was built based on the time-lapse image shown  
1013 in E. The quantified mean mScarlet-I signal intensity of each cell during its cell cycle was  
1014 plotted as a color-coded dot onto the lineage tree with each dot corresponding to the moment  
1015 of ‘birth’. Note that the tree represents the lineage from only one of the two progenitor cells  
1016 (indicated by white arrow in panel d). **F.** Working model for DNA integration and  
1017 chromosomal segregation of the transformed allele. tDNA is internalized as ssDNA, and  
1018 recombines to replace one strand on the host chromosome forming a hetero-duplex after  
1019 recombination. Following chromosomal replication and segregation, the two daughter cells  
1020 have distinct homo-duplexes (either the original allele or the tDNA allele). Note that initial  
1021 hetero-duplex formation might permit for phenotypic expression from the newly acquired  
1022 allele if the noncoding strand is replaced by tDNA (see main text).

1023

1024 **Figure 4. Single cell quantification of recombination reveals an upper level of**  
1025 **transformation efficiency**

1026 **A.** Quantification of transformation frequency by flow-cytometry. CSP-treated VL1784 was  
1027 transformed with *hlpA-mScarlet-I* tDNA of various lengths (2.7 kb, 5 kb or 7 kb) at differing  
1028 tDNA concentrations (0.0032 nM, 0.032 nM, 0.32 nM or 3.2 nM). The single nucleotide  
1029 variant to repair the point mutation is located in the middle of each fragment (**Figure 3–**  
1030 **figure supplement 2**). After 4h incubation post tDNA addition, cell chains were separated  
1031 (see **Figure 3–figure supplement 4**) and analyzed by flow-cytometry. Negative control  
1032 without any donor DNA (filled grey histogram) and positive control (VL1780, open  
1033 histogram) is shown in all panels. Red vertical line indicates the threshold used to score  
1034 mScarlet-I positive cells. **B.** Correlation between transformation frequency and donor DNA  
1035 concentration. Transformation frequency was plotted against final concentration of donor  
1036 DNA. Frequency was calculated by dividing the number of cells with a FL intensity above  
1037 the threshold by the total number of cells based on flow-cytometry data, as shown in panel A.  
1038 **C.** Alternative transformation reporter present on a different chromosomal position. The  
1039 *spv\_1159-sfGFP* reporter fusion was cloned into the CEP locus (295°; VL1786, VL1788). A  
1040 point mutation resulting in a stop codon was introduced in the linker sequence separating  
1041 *spv\_1159* and *sfGFP* in VL1788. **D.** Reduction of transformation efficiency by CRISPRi-  
1042 based *recA* depletion. CRISPRi-based depletion strains VL3485 (*P<sub>lac</sub>\_dcas9*, no sgRNA  
1043 control) and VL3486 (*P<sub>lac</sub>\_dcas9*, sgRNA targeting *recA*) were introduced in the *hlpA-stop-*  
1044 *mScarlet-I* reporter strain. Strains were pre-grown with or without IPTG (0, 0.01, 0.1 or 1  
1045 mM) in acidic C+Y (pH 6.8), and then incubated with CSP (100 ng/μl) in fresh C+Y (pH 7.8)  
1046 provided with donor tDNA (5 kb length, 0.32 nM). After 4 h of phenotypic expression,  
1047 transformed cells were analyzed by flow-cytometry.

1048

1049 **Figure 5. Effect of chromosomal position and strand on recombination potential**

1050 **A.** The *spv\_1159-sfGFP* reporter was cloned into various loci; CEP (295°; VL1786,  
1051 VL1788), *hlpA* (169°; VL3096, VL3097), *comCDE* (359°; VL3098, VL3099) or *bgaA* (101°;  
1052 VL3100, VL3101). A point mutation that generates a stop codon was introduced in the linker  
1053 sequence between *spv\_1159* and *sfGFP* for each strain (VL1788, VL3097, VL3099 or  
1054 VL3101). **B.** Flow cytometry analysis on transformations with intact *spv\_1159-sfGFP* tDNA.  
1055 Strain VL1788, VL3097, VL3099 or VL3101 was transformed with intact *spv\_1159-sfGFP*  
1056 tDNA with 5 kb homology arm at the final concentration of 3.2 nM. 4 h post transformation,  
1057 cells were separated by beat beating and analyzed by flow-cytometry. The red vertical line  
1058 indicates the threshold of positive cells in *spv\_1159-sfGFP* signal expression. **C.** Genetic  
1059 orientation effect on transformation efficiencies. All dual reporter strains VL1803, VL3347,  
1060 VL3349 or VL3351 harbor both *hlpA-stop-mScarlet-I* and *spv\_1159-stop-sfGFP* reporters,  
1061 but *spv\_1159-sfGFP* was cloned at distinct chromosomal positions and different reading  
1062 directions. *spv\_1159-stop-sfGFP* was cloned at the CEP (295°) or *bgaA* (101°) locus  
1063 resulting in strains VL1803/VL3347 or VL3349/3351, respectively. The coding strand of  
1064 *spv\_1159-sfGFP* was cloned either in the same direction as the DNA replication fork (read  
1065 direction on the leading strand) (green triangle, strains VL3347/3351) or in the opposite  
1066 direction (read direction on the lagging strand) (green square, strains VL1803/3349). The  
1067 strains were treated with CSP and transformed with corresponding *spv\_1159-sfGFP* tDNA (5  
1068 kb, 3.2 nM) alone. Transformants were analyzed by flow-cytometry. Vertical blue lines  
1069 represent the threshold for green fluorescence intensity. Experiments were performed at least  
1070 three times and FACS analysis of a typical experiment are shown.

1071

1072 **Figure 6. Dual transformation at distinct chromosomal positions**

1073 **A.** Graphical representation of dual reporter strains. Dual transformation reporter strain  
1074 VL1804 harbors the two transformation reporter constructs *hlpA-stop-mScarlet-I* and  
1075 *spv\_1159-stop-sfGFP*, at the *hlpA* and *CEP* loci, respectively. Donor tDNA (5 kb) *hlpA-*  
1076 *mScarlet-I* and *spv\_1159-sfGFP* were amplified from strain VL1800 and used for  
1077 transformation. **B.** Time-lapse visualization of double transformation. Dual reporter strain  
1078 VL1803 (*hlpA-stop-mScarlet-I*, *spv\_1159-stop-sfGFP*) was treated with CSP for 10 min,  
1079 provided with 3.2 nM of both *hlpA-mScarlet-I* and *spv\_1159-sfGFP* tDNAs (5 kb) for 10  
1080 min, and then spotted on a C+Y agarose pad to start time-lapse imaging at 5 min intervals.  
1081 Successfully transformed cells were detected by expression of HlpA-mScarlet-I (middle, red  
1082 in merge) and *spv\_1159-sfGFP* (bottom panels, green in merge). Red and Green arrows  
1083 indicate single transformed cells with *hlpA-mScarlet-I* and *spv\_1159-sfGFP* tDNA,  
1084 respectively. Yellow arrows indicate doubly transformed cells. Scale bar: 4  $\mu$ m. See **Video 4**.  
1085 **C.** Cell lineage tree with superimposed fluorescence intensity was built based on the time-  
1086 lapse image shown in B. Means of mScarlet-I (pink) and sfGFP (green) signal intensity of  
1087 each cell was calculated and displayed with a color bar. Yellow, green and red arrows  
1088 indicate double transformed, single *spv\_1159-sfGFP*-transformed and single *hlpA-mScarlet-*  
1089 *I*-transformed lineages, respectively. **D.** Snap shots and quantitative image analysis of  
1090 transformed populations. Strain VL1803 was transformed with single (*hlpA-mScarlet-I* or  
1091 *spv\_1159-sfGFP*) or double (*hlpA-mScarlet-I/spv\_1159-sfGFP*) tDNA(s) (5 kb) at final  
1092 concentration of 3.2 nM. After 4 h of incubation, still images were obtained and the  
1093 fluorescence intensities were quantified and plotted. Scale bar: 10  $\mu$ m. Experiments were  
1094 performed at least three times and microscopy analysis of a typical experiment are shown. **E.**  
1095 Proportion of transformed phenotypes. Stacked bars represent the fraction of single  
1096 transformed (red or green), double transformed (yellow) and non-transformed (grey) cells.  
1097 Population of each transformed phenotype was quantified from microscopy images. Bars

1098 represent mean  $\pm$  SD of three independent replicates. Analyzed data of the positive control  
1099 strain VL1800 (*hlpA-mScarlet-I*, *spv\_1159-sfGFP*) and negative control non-transformed  
1100 strain VL1803 (*hlpA-stop-mScarlet-I*, *spv\_1159-stop-sfGFP*) are also shown, demonstrating  
1101 the accuracy of the threshold used to score positive transformants.

1102

1103 **Figure 7. Direct observation of recombination of three separate tDNAs during a single**  
1104 **transformation event**

1105 **A.** Schematic representation of the triple labeled strain VL3126 harboring three reporter  
1106 cassettes: *hlpA-mScarlet-I*, *spv\_1159-msfYFP* and *ftsZ-mTurquoise2* at the *hlpA*, *CEP* and  
1107 *ftsZ* loci, respectively. Strain VL3127 contains stop codon mutations in the linker between  
1108 each of the fluorescent fusion proteins. Gray arrows indicate the direction of the DNA  
1109 replication fork relative to the reporter cassette. **B.** Microscope image of strain VL3127  
1110 treated with CSP and transformed with the tDNAs of *hlpA-mScarlet-I*, *spv\_1159-sfGFP* and  
1111 *ftsZ-mTurquoise2* (3.2 nM each) amplified from VL3126. Merge image of phase contrast,  
1112 cyan (FtsZ-mTurquoise2), yellow (*spv\_1159-msYFP*) and red (HlpA-mScarlet-I)  
1113 fluorescence is shown. Scale bar: 10  $\mu$ m. **C and D.** Proportion of transformed phenotypes.  
1114 Population of each transformed phenotype was quantified from microscope images.  
1115 Representative images for each phenotype are shown. Scale bar: 2  $\mu$ m. **D.** Stacked bars  
1116 represent proportion of single transformed (cyan, yellow or red), double transformed [green  
1117 (cyan+yellow), blue (cyan+red), orange (yellow+red)], triple transformed (white) and non-  
1118 transformed (grey) cells. Bars represent mean  $\pm$  SD of three independent replicates. Analyzed  
1119 data of the positive control strain VL3126 (*ftsZ-mTurquoise2*, *spv\_1159-msfYFP*, *hlpA-*  
1120 *mScarlet-I*) and negative control non-transformed strain VL3127 (*ftsZ-stop-mTurquoise2*,



1121 *spv\_1159-stop-msfYFP*, *hlpA-stop-mScarlet-I*) are also shown, demonstrating the accuracy of  
1122 the threshold used to score positive transformants.

1123 **E.** Competition effect of unrelated DNA on transformation frequency. CSP-treated VL1803  
1124 was transformed with 7 kb *hlpA-mScarlet-I* tDNA at the final concentration of 0.32 nM in the  
1125 absence or the presence of an unrelated DNA fragment (0.32 nM or 3.2 nM) amplified from  
1126 *E. coli*. After incubation of 4 h post transformation, cells were separated and analyzed by  
1127 flow-cytometry. Red vertical line indicates the threshold of positive cells in mScarlet-I signal  
1128 expression. The proportion of positive cells (%) is depicted in the plots. **F.** Fragmented tDNA  
1129 recombination model. The fluorescence-based reporters used in this study rely on  
1130 replacement of the stop codon SNP (grey star) by intact (amino acid coding) SNP (yellow  
1131 star) that is located in the middle of the tDNA fragment (orange line). All prepared tDNA  
1132 molecules have obviously intact SNP, but, integration into host chromosome may take place  
1133 outside the SNP, which is never distinguished from true untransformed cells by the  
1134 fluorescence-based system and effectively acting as competing DNA for tDNA's that  
1135 transform the SNP.

1136

### 1137 **Figure 8. Horizontal gene transfer between *S. pneumoniae* strains**

1138 **A.** Schematic representation of the transformation assay between *S. pneumoniae* strains. Pre-  
1139 cultured recipient strain R895 (*cmR*) and donor strain R4692 ( $\Delta comCDE$ , *smR*, *nov<sup>R</sup>*) were  
1140 mixed in approximately 3:7 ratio, and spotted on 3% horse blood CAT-agar (see Methods).  
1141 After 4h incubation at 37°C to allow strain-to-strain transformation, cells were scraped and  
1142 separated by sonication. Then, serial dilutions of cell suspensions were plated with 4.5 µg/mL  
1143 of chloramphenicol (Cm, for the recovery of the total number of viable recipient cells) and  
1144 with combinations of chloramphenicol plus streptomycin (Sm, 10 µg/mL) and/or novobiocin  
1145 (Nov, 4 µg/mL). **B.** Transformation efficiency was calculated by dividing the number of

1146 transformants by the total number of viable recipient count. Four independent biological  
1147 replicates were performed and box plots demonstrate the average efficiencies.

1148

## 1149 **Figure supplements**

### 1150 **Figure 2–figure supplement 1. Single cell quantification of spontaneously activated** 1151 **competence.**

1152 **A.** Competence reporter strain VL2219 (cytoplasmic msfYFP reporter of transcriptional  
1153 fusion to *ssbB*) was incubated in C+Y in the absence of CSP. After 100 min (peak of  
1154 spontaneous competence, see **Figure 2A**), the cells were analyzed by fluorescence  
1155 microscopy. Images are overlays of phase contrast and YFP signal. Scale bar, 20  $\mu$ m. **B.**  
1156 Quantification of competence positive cells. Scatter plot of single cell YFP signal intensity (y  
1157 axis) against cell length (x axis), based on microscope images shown in panel a. Red line  
1158 indicates threshold used to score YFP positive cells. Proportion of positive cells (%) is  
1159 shown.

1160

### 1161 **Figure 2–figure supplement 2.**

1162 Fluorescence microscopy images of VL2536 (*msfYFP-comEA*), VL2537 (*comFA-msfYFP*),  
1163 VL2538 (*comGA-msfYFP*), VL3355 (*dprA::dprA-msfYFP*) and VL361 (*recA::recA-*  
1164 *mCherry*) treated with (orange frame) or without (grey frame) CSP for 20 min. Images are  
1165 overlays of phase contrast and YFP signal. Scale bar, 20  $\mu$ m. Magnified images of induced  
1166 condition are also shown in the inset. Scale bar, 2  $\mu$ m.

1167

### 1168 **Figure 3–figure supplement 1. Classical methodology for transformation frequency** 1169 **estimation by antibiotics selection.**

1170 **A.** Workflow representation of the experiment. D39V wild type (Sm susceptible) or its *rpsL*  
1171 mutant derivative (Sm resistant) were treated with synthetic CSP and transformed with Sm  
1172 resistance (*rpsL\**) or Sm susceptible (*rpsL<sub>WT</sub>*) of *rpsL* allele, respectively (5kb, SNP in the  
1173 middle, 3.2 nM of DNA). With or without additional incubation for 2 h in liquid C+Y  
1174 medium, then serially diluted bacterial suspensions were plated onto two Columbia agar  
1175 plates for each. For phenotypic expression, agar plates were incubated 2 h in 37°C and then  
1176 overlaid with additional Columbia agar containing streptomycin or no antibiotics, followed  
1177 by over-night incubation. Colony forming units (cfu) were counted for each plate and the  
1178 ratio of Sm resistant cfu (on +Sm plate) divided by total cfu (on plate without antibiotic) was  
1179 calculated to evaluate the transformation frequency. **B.** Histogram represents mean and SD  
1180 (from three replicates) of Sm resistant cfu against total cfu for each transformation setting.  
1181 Note that when transforming the *smR* host, *smR* cfu reflects the un-transformed population.

1182

1183 **Figure 3—figure supplement 2. Fluorescence-based detection of successful genetic**  
1184 **transformation.**

1185 **A.** Stop codon generating SNP introduced in reporter strain. Nucleotide sequence of linker  
1186 between *hlpA* (grey) and *mScarlet-I* (red) in strains VL1780 (up) and VL1784 (bottom) are  
1187 shown. Bold letter under the nucleotide sequence indicates translated amino acids. In parent  
1188 strain VL1780 (*hlpA-mScarlet-I*), translation of *hlpA* and *mScarlet-I* are bridged by a linker  
1189 sequence (39 bp, 13 amino acids). In reporter strain VL1784 (*hlpA-stop-mScarlet-I*), a single  
1190 nucleotide mutation (G>T) was induced, resulting in a stop codon in the middle of the linker  
1191 so that *mScarlet-I* is not translated unless it is transformed with the intact sequence (i.e. *hlpA-*  
1192 *mScarlet-I*). Note that other reporter genes used in this study have the identical linker  
1193 sequence and SNP. **B.** Schematic representation of the fluorescence-based transformation  
1194 reporter. Once genetic recombination of donor DNA (intact PCR fragment of *hlpA-mScarlet-*

1195 *I* from VL1780) into strain VL1784 succeeds, the stop codon between *hlpA* and *mScarlet-I* is  
1196 repaired, which allows for production of the fluorescent protein.

1197

1198 **Figure 3–figure supplement 3. Growth curves of the reporter strains.**

1199 Pre-cultured *S. pneumoniae* strains D39V (wild type), VL1800 (*hlpA-mScarlet-I*, *spv\_1159-*  
1200 *sfGFP*). VL1803 (*hlpA-stop-mScarlet-I*, *spv\_1159-stop-sfGFP*), VL3126 (*ftsZ-mTurquoise2*,  
1201 *spv\_1159-msfYFP*, *hlpA-mScarlet-I*) and VL3127 (*ftsZ-stop-mTurquoise2*, *spv\_1159-stop-*  
1202 *msfYFP*, *hlpA-stop-mScarlet-I*), were inoculated into fresh C+Y media at initial concentration  
1203 of OD = 0.1 with or without CSP, which is the exact same cultivation condition to  
1204 transformation experiment implemented in this study. Lines and confidence bands represent  
1205 means of three replicates and SD, respectively.

1206

1207 **Figure 3–figure supplement 4. Effect of multicellular filament disruption by beadbeater**  
1208 **on estimation of transformation frequency in flow-cytometry analysis.**

1209 **A.** Effect of cell separation treatment by beadbeater on FSC-SSC profile. Dual reporter strain  
1210 VL1803 treated with CSP was transformed with mock (no DNA) or single (*hlpA-mScarlet-I*  
1211 fragment or *spv\_1159-sfGFP*) or double tDNA fragments. After 4 h incubation for  
1212 phenotypic expression and chromosome segregation, cells were analyzed by flow-cytometry.  
1213 Without beadbeater treatment (bottom panels), FSC-SSC profile showed increased value and  
1214 heterogeneity compared to beadbeater cells (top panels). It is noted that one event in flow-  
1215 cytometry does not indicate one single cell but one particle, which might consist of a  
1216 multicellular filament. **B.** Microscopic images of cells prepared in panel a. Bead beater-  
1217 untreated cells showed chained phenotype consisting of >4 cells, meanwhile bead beater-  
1218 treated cells showed shorter chain consisting of 2–4 cells, in line with FSC-SSC profile in  
1219 flow-cytometry (panel A). Scale bar, 20  $\mu\text{m}$ . **C.** Effect of cell separation treatment by

1220 beadbeater on apparent transformation frequency in flow-cytometry. Note that bead beater-  
1221 untreated cells tend to show generally more population of fluorescence positive cells  
1222 compared to beadbeater-treated cells. This may be explained by masking of the negative cells  
1223 by positive cells within the same chain as height values (highest peak) are measured for  
1224 fluorescence. Vertical or horizontal red line represent threshold for green or red fluorescence  
1225 intensity, respectively. **D.** Correlation between particle size and apparent transformation  
1226 frequency. Distributions of FSC value (particle size in flow-cytometry) grouped by  
1227 transformed- (including both of each single and double transformed population, orange bars)  
1228 or un-transformed (grey bars) population are shown. In separated cells, there is no significant  
1229 difference in FSC profile between un-transformed and transformed particles. Meanwhile, in  
1230 beadbeater-untreated cells, transformed group tends to show higher FCS value than  
1231 untransformed group. events with high FSC (longer filament) tend to have more chance to be  
1232 estimated as transformed.

1233 **Figure 4–figure supplement 1. Time-lapse imaging of transformation with *spv\_1159-***  
1234 ***sfGFP* fragment in VL1788.**

1235 **A.** Time-lapse visualization of transformation with *spv\_1159-sfGFP* fragment in VL1788  
1236 (CEP::*P3\_spv\_1159-stop-sfGFP*). VL1788 was treated with CSP for 10 min, added with  
1237 tDNA (*spv\_1159-sfGFP*) for 10 min, and then spotted on C+Y agarose pad to start time-lapse  
1238 imaging with 5 min intervals. Phase contrast images (left, panels) were obtained for cell  
1239 segmentation in image analysis. Successfully transformed cells were detected by expression  
1240 of SPV\_1159-sfGFP (middle panels). Also see **Video 2** for original movie. **B.** Cell lineage  
1241 tree with fluorescence intensity was built based on the time-lapse image in panel A. Means of  
1242 sfGFP signal intensity of each cells were calculated and displayed with ball color. Note that

1243 fluorescence signals detected in the initial few time points were mostly background from  
1244 C+Y medium rather than that derived from SPV\_1159-sfGFP.

1245

1246 **Figure 4—figure supplement 2. Effect of *hexA* knockout on transformation frequency in**  
1247 **the fluorescence-based reporter.** Dual reporter strain VL1803 (*hlpA-stop-mScarlet-I*,  
1248 *spv\_1159-stop-sfGFP*) and its derivative VL1930 (VL1803+ $\Delta$ *hexA*) were treated with CSP  
1249 and transformed with *hlpA-mScarlet-I* or/and *spv\_1159-sfGFP* tDNA (3.2  $\mu$ M each). The  
1250 transformed cells were analyzed by flow-cytometry. Vertical or horizontal red line represent  
1251 threshold for green or red fluorescence intensity, respectively.

1252

1253 **Figure 4—figure supplement 3. Effect of *recA* knock-down on bacterial growth.** Pre-  
1254 cultured *S. pneumoniae* strains, DL3485 (*prs1::lacI*; *bgaA::Plac\_dcas9*, *hlpA::hlpA\_hlpA-*  
1255 *stop-mScarlet-I*) and DL3485 (*prs1::lacI*; *bgaA::Plac\_dcas9*, *hlpA::hlpA\_hlpA-stop-*  
1256 *mScarlet-I*) were inoculated into fresh C+Y media at initial concentration of OD = 0.01 with  
1257 or without CSP and IPTG. Lines and confidence bands represent means of three replicates  
1258 and SD, respectively.

1259

1260 **Figure 5—figure supplement 1. Chromosomal position effect on correlation between**  
1261 **transformation frequency and tDNA concentration.** The *spv\_1159-sfGFP* reporter was  
1262 cloned into various loci; CEP (295°; VL1788), *hlpA* (169°; VL3097), *comCDE* (359°;  
1263 VL3099) or *bgaA* (101°; VL3101). A point mutation that generates a stop codon was  
1264 introduced in the linker sequence between *spv\_1159* and *sfGFP* for each strain (**Figure 5A**).  
1265 Flow cytometry analysis on transformations with intact *spv\_1159-sfGFP* tDNA. Strains  
1266 VL1788, VL3097, VL3099 or VL3101 were transformed with intact *spv\_1159-sfGFP* tDNA

1267 with 5 kb homology arm at the final concentration of 0, 0.032, 0.32 or 3.2 nM. 4 h post  
1268 transformation, cells were separated by bead beating and analyzed by flow-cytometry.  
1269 Transformation frequency was plotted against final concentration of donor DNA. Frequency  
1270 was calculated by dividing the number of cells with a FL intensity above the threshold by the  
1271 total number of cells based on flow-cytometry data.

1272

1273 **Figure 5–figure supplement 2. Effect of chromosomal strand to be replaced by tDNA on**  
1274 **progression of phenotypic expression during cell division.**

1275 **A.** Two possible recombination outcomes of single stranded tDNA into the host chromosome  
1276 are shown. As tDNA (orange line) is processed to a single stranded DNA molecule during  
1277 internalization, recombination can only occur on one strand of the host chromosome.  
1278 Therefore, if the tDNA encodes new phenotypic information, which of (i) coding or (ii)  
1279 noncoding strand to be replaced will affect phenotypic expression dynamics derived from the  
1280 newly acquired allele. **B.** Hypothetical model of phenotypic expression dynamics depending  
1281 on which strand is replaced by tDNA. In case of coding strand replacement (i), RNAP uses  
1282 the original allele as template to synthesize transcripts (grey dashed line), and transcription of  
1283 tDNA-derived sequence occurs only once the homo-duplex forms after one replication cycle.  
1284 Also, it may take more cell divisions to replace the original product (proteins, etc.) (grey  
1285 balls) by tDNA-derived products (orange balls) to express visible phenotype. Meanwhile, in  
1286 case of non-coding strand replacement (ii), transcription from tDNA is permitted as RNAP  
1287 recognizes the tDNA sequence and synthesizes transcripts from it (orange dashed line).  
1288 Consequently, tDNA-derived products (orange balls) come up right after recombination  
1289 before cell division without forming the homo-duplex. After cell division, tDNA-derived  
1290 products can be non-genetically distributed even in progenitor with homo-duplex of original  
1291 allele not only in one with homo-duplex of tDNA-derived allele. Therefore, in this case non-

1292 genetic inheritance is observed. This phenotypically intermediate state should be solved  
1293 according to a couple of cell divisions as non-genetic inheritance will be diluted out. **C.**  
1294 Representative example of two types of phenotypic expression. The model described in panel  
1295 **B** is also suggested by actual observations. Shown is a time-lapse montage of VL1784 (*hlpA-*  
1296 *stop-mScarlet-I*) transformed with *hlpA-mScarlet-I* tDNA where two transformed events  
1297 (indicated by white and yellow arrows, respectively) are visualized side by side. Similarly, as  
1298 already shown in **Figure 3**, the cell indicated by the white arrow expresses fluorescence  
1299 relatively early during the time -lapse, and also gradual reduction of fluorescence is observed  
1300 in progenitors in one side of the lineage. On the other hand, the cells indicated by yellow  
1301 started expressing fluorescence a little bit later than cells indicated by white arrow,  
1302 suggesting that this lineage might need cell division to form homo-duplex to transcribe tDNA  
1303 allele. Importantly, this cell lineage did not show evidence of non-genetic phenotypic  
1304 expression. Collectively, according to the model described in panel **B**, it seems that the cell  
1305 lineage indicated by the white arrow was transformed at the noncoding strand and the cell  
1306 indicated by the yellow arrow was transformed at the coding strand. Scale bar, 4  $\mu\text{m}$ .

1307

1308 **Figure 6–figure supplement 1. Expected outcome of genetic proportion after saturated**  
1309 **transformation.**

1310 **A.** Expected genetic proportion after saturated single transformation. In single fragment  
1311 (allele) transformation the proportion of progenitors with a tDNA-replaced allele or the  
1312 original allele becomes 50:50. This can be predicted and explained by the principle  
1313 mechanism of natural genetic transformation in which tDNA is processed into single stranded  
1314 DNA and is integrated into one strand of the host chromosome. **B, C.** Expected genetic  
1315 proportion after saturated multiple transformations in case each recombination event is  
1316 independent from the other. Note that for simplification, the single circular chromosome is



1317 depicted as separate linear fragments. As shown in this study, multiple transformation events  
1318 can occur at the distinct loci at the same time in single cell. If multiple transformation events  
1319 do not interfere with each other and take place independently, most cells in the population  
1320 would have a higher chance to acquire a tDNA, and the proportion of untransformed cells  
1321 that did not acquire any tDNA fragments should be reduced. In the case of 2 tDNAs (panel  
1322 b), the expected outcome would be that 25% of the transformants obtained both new alleles,  
1323 25% just one of the two tDNAs and 25% would have the wild type genome. In the case of 3  
1324 tDNAs (panel c), the expected outcome, when every tDNA would be converted on one of the  
1325 recipient strands independent from the next tDNA, would be that 12.5% of the transformants  
1326 would have the wild type genome. Note that the theoretical outcomes showcased in panels a-  
1327 c do not match our experimental observations (**Figure 6E** and **7C–D**) in which in general  
1328 more than 50% of the cells did not acquire the SNP. However, the relative transformation  
1329 efficiencies do seem to be independent. For instance, from the data of **Figure 6** (double  
1330 tDNA), the observed transformation frequencies were for single *hlpA-mScarlet-I* red  
1331 transformants (R) 20.2 %. The observed transformation frequency to become green (G) by  
1332 the take up and integration of *spv\_1159-sfGFP* was 15.2 % ( $P(G)=0.152$ ). The observed  
1333 transformation frequencies for both *hlpA-mScarlet-I* (R) and *spv\_1159-sfGFP* (G) was 15.6  
1334 %. So, the observed number of R cells were  $20.2 + 15.6 = 35.8\%$  and the observed number of  
1335 G cells were  $15.2 + 15.6 = 30.8\%$ . These values are largely in line if transformation of both  
1336 *mScarlet-I* (R) and *spv\_1159-sfGFP* (G) are independent as the chance (P) to become R =  
1337  $0.358*(1-0.308) = 24.7\%$  (observed 20.2%). For G:  $0.308*(1-0.358) = 19.7\%$  (observed  
1338 15.2%). For both R and G:  $0.358*0.308=11.0\%$  (observed 15.6%). Finally, the proportion of  
1339 untransformed cells:  $(1-0.308)*(1-0.358) = 44.4\%$  (observed 49%). A similar calculation can  
1340 be done for the triple tDNA transformation from **Figure 7**: *hlpA-mScarlet-I* (Red, R),  
1341 *spv\_1159-msfYFP* (Yellow, Y) and *ftsZ-mTurquoise2* (Cyan, C). Observed values were: P(C)

1342 = 12.7+2.2+4.1+1.5 = 20.5 --> 0.205. P(Y) = 7.7+2.2+2.1+1.5 = 13.5 --> 0.135. P(R) =  
1343 11.0+4.1+2.1+1.5=18.7 --> 0.187. If these tDNAs are taken up independent of each other the  
1344 expected percentages would be: C+Y:  $0.205 \times 0.135 \times (1-0.187) = 2.2\%$  (observed: 2.2%).  
1345 C+R:  $0.205 \times 0.187 \times (1-0.135) = 3.3\%$  (observed: 4.1%). Y+R:  $0.135 \times 0.187 \times (1-0.205) = 2.0\%$   
1346 (observed: 2.1%). C+Y+R:  $0.205 \times 0.135 \times 0.187 = 0.5\%$  (observed: 1.5%). Untransformed:  $(1-$   
1347  $0.205)(1-0.135)(1-0.187) = 55.9\%$  (observed: 58.7%). Together, this data suggests that in  
1348 principle each transformation event is independent from each other but, since non-  
1349 homologous DNA can compete for successful recombination events (**Figure 7E**), saturation  
1350 of the uptake and integration system become limiting as well as off target recombination  
1351 events that cannot be measured in our SNP assay. This last point is illustrated in **Figure 7E**  
1352 of the main text.

1353

## 1354 **Videos**

1355

### 1356 **Video 1. Visualization of transformation using *hlpA-mScarlet-I* reporter.**

1357 Shown is a movie of transformation with *hlpA-mScarlet-I* tDNA fragment in VL1832 (*hlpA-*  
1358 *stop-mScarlet-I*) depicted in **Figure 3E**. Images are sfGFP (left), mScarlet-I (middle) and  
1359 merged image (right). Frame interval, 5 min. Scale bar, 4  $\mu\text{m}$ .

1360

### 1361 **Vide 2. Visualization of population dynamics after transformation using *hlpA-mScarlet-*** 1362 ***I* reporter.**

1363 Shown is a movie of transformation with *hlpA-mScarlet-I* tDNA fragment in VL1832 (*hlpA-*  
1364 *stop-mScarlet-I*) in lower magnification. Images are merged of phase contrast and mScarlet-I  
1365 fluorescence signal. Frame interval, 5 min. Scale bar, 20  $\mu\text{m}$ .

1366

1367 **Video 3. Visualization of transformation using *spv\_1159-sfGFP* reporter.**

1368 Shown is a movie of transformation with *spv\_1159-sfGFP* tDNA fragment in VL1788  
1369 (*spv\_1159-stop-sfGFP*) depicted in **Figure 4—figure supplement 1**. Images are phase  
1370 contrast (left), sfGFP (middle), merged image (right) Frame interval, 5 min. Scale bar, 4  $\mu\text{m}$ .

1371

1372 **Video 4. Visualization of double transformation in the population.**

1373 Shown is a movie of double transformation with *hlpA-mScarlet-I* and *spv\_1159-sfGFP* tDNA  
1374 fragments in dual reporter strain VL1803 (*hlpA-stop-mScarlet-I, spv\_1159-stop-sfGFP*).  
1375 White arrow indicates a double transformed cell lineage. Frame interval, 5 min. Scale bar, 20  
1376  $\mu\text{m}$ .

1377

1378 **Video 5. Visualization of double transformed cells.**

1379 Shown is an enlarged movie of *hlpA-mScarlet-I* and *spv\_1159-sfGFP* tDNA fragments in  
1380 dual reporter strain VL1803 (*hlpA-stop-mScarlet-I, spv\_1159-stop-sfGFP*) depicted in **Figure**  
1381 **6B**. Images are mScarlet-I (left), sfGFP (middle), merged image (right) Frame interval, 5  
1382 min. Scale bar, 4  $\mu\text{m}$ .

1383

1384 **Video 6. Visualization of triple transformation in population.**

1385 Shown is a movie of triple transformations with *ftsZ-mTurquoise2*, *spv\_1159-msfYFP* and  
1386 *hlpA-mScarlet-I* tDNA fragments in triple reporter strain VL1803 (*ftsZ-stop-mTurquoise2,*  
1387 *spv\_1159-stop-msfYFP, hlpA-stop-mScarlet-I*). Frame interval, 10 min. Scale bar, 20  $\mu\text{m}$ .

1388

1389 **Video 7. Visualization of differential phenotypic expression timing on sense strand and**  
1390 **anti-sense strand transformation.**

1391 Shown is a movie of transformation with *hlpA-mScarlet-I* tDNA fragment in VL1832 (*hlpA-*  
1392 *stop-mScarlet-I*) depicted in **Figure 5–figure supplement 2**. Images are an overlay between  
1393 phase contrast and mScarlet-I signal. White arrow indicates a likely anti-sense strand  
1394 transformed cell and the yellow arrow indicates a likely sense strand transformed cell (See  
1395 text for details). Frame interval, 5 min. Scale bar, 4  $\mu\text{m}$ .  
1396

1397 **References**

1398  
1399

- 1400 Alloing G, Granadel C, Morrison DA, Claverys JP. 1996. Competence pheromone,  
1401 oligopeptide permease, and induction of competence in *Streptococcus pneumoniae*.  
1402 *Molecular microbiology* **21**:471–478. doi:10.1111/j.1365-2958.1996.tb02556.x
- 1403 Attaiech L, Olivier A, Mortier-Barrière I, Soulet A-L, Granadel C, Martin B, Polard P,  
1404 Claverys J-P. 2011. Role of the single-stranded DNA-binding protein SsbB in  
1405 pneumococcal transformation: maintenance of a reservoir for genetic plasticity. *PLOS*  
1406 *Genetics* **7**:e1002156. doi:10.1371/journal.pgen.1002156
- 1407 Avery OT, Macleod CM, McCarty M. 1944. Studies On The Chemical Nature Of The  
1408 Substance Inducing Transformation Of Pneumococcal Types : Induction Of  
1409 Transformation By A Desoxyribonucleic Acid Fraction Isolated From Pneumococcus  
1410 Type III. *The Journal of experimental medicine* **79**:137–158. doi:10.1084/jem.79.2.137
- 1411 Beilharz K, Raaphorst R, Kjos M, Veening J. 2015. Red Fluorescent Proteins for Gene  
1412 Expression and Protein Localization Studies in *Streptococcus pneumoniae* and Efficient  
1413 Transformation with DNA Assembled via the Gibson Assembly Method. *Appl Environ*  
1414 *Microb* **81**:7244–7252. doi:10.1128/aem.02033-15
- 1415 Bergé M, Kamgoué A, Martin B, Polard P, Campo N, Claverys J. 2013. Midcell Recruitment  
1416 of the DNA Uptake and Virulence Nuclease, EndA, for Pneumococcal Transformation.  
1417 *Plos Pathog* **9**:e1003596. doi:10.1371/journal.ppat.1003596
- 1418 Berge M, Mortier-Barrière I, Martin B, Claverys J-P. 2003. Transformation of *Streptococcus*  
1419 *pneumoniae* relies on DprA- and RecA-dependent protection of incoming DNA single  
1420 strands. *Molecular microbiology* **50**:527–536. doi:10.1046/j.1365-2958.2003.03702.x
- 1421 Berge M, Moscoso M, Prudhomme M, Martin B, Claverys J-P. 2002. Uptake of transforming  
1422 DNA in Gram-positive bacteria: a view from *Streptococcus pneumoniae*. *Molecular*  
1423 *microbiology* **45**:411–421. doi:10.1046/j.1365-2958.2002.03013.x
- 1424 Bergé MJ, Mercy C, Mortier-Barrière I, VanNieuwenhze MS, Brun YV, Grangeasse C,  
1425 Polard P, Campo N. 2017. A programmed cell division delay preserves genome integrity  
1426 during natural genetic transformation in *Streptococcus pneumoniae*. *Nature*  
1427 *communications* **8**:1621–13. doi:10.1038/s41467-017-01716-9
- 1428 Bindels DS, Haarbosch L, Weeren L van, Postma M, Wiese KE, Mastop M, Aumonier S,  
1429 Gotthard G, Royant A, Hink MA, Gadella TWJ. 2017. mScarlet: a bright monomeric red  
1430 fluorescent protein for cellular imaging. *Nature methods* **14**:53–56.  
1431 doi:10.1038/nmeth.4074
- 1432 Blokesch M. 2016. Natural competence for transformation. *Current biology : CB* **26**:R1126–  
1433 R1130. doi:10.1016/j.cub.2016.08.058

- 1434 Boonstra M, Vesel N, Kuipers OP. 2018. Fluorescently Labeled DNA Interacts with  
1435 Competence and Recombination Proteins and Is Integrated and Expressed Following  
1436 Natural Transformation of *Bacillus subtilis*. *Mbio* **9**:e01161-18. doi:10.1128/mbio.01161-  
1437 18
- 1438 Boudes M, Sanchez D, Graille M, Tilbeurgh H van, Durand D, Quevillon-Cheruel S. 2014.  
1439 Structural insights into the dimerization of the response regulator ComE from  
1440 *Streptococcus pneumoniae*. *Nucleic acids research* **42**:5302–5313.  
1441 doi:10.1093/nar/gku110
- 1442 Brockhurst MA, Harrison E, Hall JPJ, Richards T, McNally A, Maclean C. 2019. The  
1443 Ecology and Evolution of Pangenomes. *Current biology : CB* **29**:R1094–R1103.  
1444 doi:10.1016/j.cub.2019.08.012
- 1445 Bryskier A. 2002. Viridans group streptococci: a reservoir of resistant bacteria in oral cavities.  
1446 *Clinical microbiology and infection : the official publication of the European Society of*  
1447 *Clinical Microbiology and Infectious Diseases* **8**:65–69. doi:10.1046/j.1198-  
1448 743x.2001.00398.x
- 1449 Campbell EA, Choi SY, Masure HR. 1998. A competence regulon in *Streptococcus*  
1450 *pneumoniae* revealed by genomic analysis. *Molecular microbiology* **27**:929–939.  
1451 doi:10.1046/j.1365-2958.1998.00737.x
- 1452 Carrasco B, Serrano E, Sánchez H, Wyman C, Alonso JC. 2016. Chromosomal  
1453 transformation in *Bacillus subtilis* is a non-polar recombination reaction. *Nucleic Acids*  
1454 *Res* **44**:2754–68. doi:10.1093/nar/gkv1546
- 1455 Chandler MS, Morrison DA. 1988. Identification of two proteins encoded by *com*, a  
1456 competence control locus of *Streptococcus pneumoniae*. *Journal of bacteriology*  
1457 **170**:3136–3141. doi:10.1128/jb.170.7.3136-3141.1988
- 1458 Chastanet A, Prudhomme M, Claverys J-P, Msadek T. 2001. Regulation of *Streptococcus*  
1459 *pneumoniae* *clp* Genes and Their Role in Competence Development and Stress Survival. *J*  
1460 *Bacteriol* **183**:7295–7307. doi:10.1128/jb.183.24.7295-7307.2001
- 1461 Chen I, Dubnau D. 2004. DNA uptake during bacterial transformation. *Nature Reviews*  
1462 *Microbiology* **2**:241–249. doi:10.1038/nrmicro844
- 1463 Chewapreecha C, Harris SR, Croucher RMCWPTSDBCFNJ, Turner C, Marttinen P, Cheng  
1464 L, Pessia A, Aanensen DM, Mather AE, Page AJ, Salter SJ, Harris D, Nosten F, Goldblatt  
1465 D, Corander J, Parkhill J, Turner P, Bentley SD. 2014. Dense genomic sampling identifies  
1466 highways of pneumococcal recombination. *Nature genetics* **46**:305–309.  
1467 doi:10.1038/ng.2895
- 1468 Claverys JP, Lacks SA. 1986. Heteroduplex deoxyribonucleic acid base mismatch repair in  
1469 bacteria. *Microbiological reviews Baltimore* **50**:133–165.
- 1470 Claverys J-P, Prudhomme M, Martin B. 2006. Induction of competence regulons as a general  
1471 response to stress in gram-positive bacteria. *Annual review of microbiology* **60**:451–475.  
1472 doi:10.1146/annurev.micro.60.080805.142139

- 1473 Corbinais C, Mathieu A, Kortulewski T, Radicella JP, Marsin S. 2016. Following  
1474 transforming DNA in *Helicobacter pylori* from uptake to expression: Visualising *H. pylori*  
1475 transformation. *Mol Microbiol* **101**:1039–1053. doi:10.1111/mmi.13440
- 1476 Cowley LA, Petersen FC, Junges R, Jimenez MJD, Morrison DA, Hanage WP. 2018.  
1477 Evolution via recombination: Cell-to-cell contact facilitates larger recombination events in  
1478 *Streptococcus pneumoniae*. *PLOS Genetics* **14**:e1007410.  
1479 doi:10.1371/journal.pgen.1007410
- 1480 Croucher N, Løchen A, Bentley S. 2018. Pneumococcal Vaccines: Host Interactions,  
1481 Population Dynamics, and Design Principles. *Annu Rev Microbiol* **72**:521–549.  
1482 doi:10.1146/annurev-micro-090817-062338
- 1483 Croucher RMCWPTSDBCFNJ, Mostowy R, Wymant C, Turner P, Bentley SD, Fraser C.  
1484 2016. Horizontal DNA Transfer Mechanisms of Bacteria as Weapons of Intragenomic  
1485 Conflict. *PLOS Biology* **14**:e1002394-42. doi:10.1371/journal.pbio.1002394
- 1486 Dagkessamanskaia A, Moscoso M, Hénard V, Guiral S, Overweg K, Reuter M, Martin B,  
1487 Wells J, Claverys J-P. 2004. Interconnection of competence, stress and *CiaR* regulons in  
1488 *Streptococcus pneumoniae*: competence triggers stationary phase autolysis of *ciaR* mutant  
1489 cells. *Molecular microbiology* **51**:1071–1086. doi:10.1111/j.1365-2958.2003.03892.x
- 1490 Dalia AB, Dalia TN. 2019. Spatiotemporal Analysis of DNA Integration during Natural  
1491 Transformation Reveals a Mode of Nongenetic Inheritance in Bacteria. *Cell* **179**:1499-  
1492 1511.e10. doi:10.1016/j.cell.2019.11.021
- 1493 Dalia AB, McDonough E, Camilli A. 2014. Multiplex genome editing by natural  
1494 transformation. *P Natl Acad Sci Usa* **111**:8937–42. doi:10.1073/pnas.1406478111
- 1495 Davidoff-Abelson R, Dubnau D. 1971. Fate of transforming DNA after uptake by competent  
1496 *Bacillus subtilis*: failure of donor DNA to replicate in a recombination-deficient recipient.  
1497 *Proceedings of the National Academy of Sciences of the United States of America*  
1498 **68**:1070–1074. doi:10.1073/pnas.68.5.1070
- 1499 Domenech A, Brochado AR, Sender V, Hentrich K, Henriques-Normark B, Typas A,  
1500 Veening J-W. 2020. Proton Motive Force Disruptors Block Bacterial Competence and  
1501 Horizontal Gene Transfer. *Cell Host Microbe* **27**:544-555.e3.  
1502 doi:10.1016/j.chom.2020.02.002
- 1503 Domenech A, Slager J, Veening J. 2018. Antibiotic-Induced Cell Chaining Triggers  
1504 Pneumococcal Competence by Reshaping Quorum Sensing to Autocrine-Like Signaling.  
1505 *Cell Reports* **25**:2390-2400.e3. doi:10.1016/j.celrep.2018.11.007
- 1506 Dubnau D, Blokesch M. 2019. Mechanisms of DNA Uptake by Naturally Competent  
1507 Bacteria. *Annual review of genetics* **53**:217–237. doi:10.1146/annurev-genet-112618-  
1508 043641
- 1509 Dutreix M, Rao BJ, Radding CM. 1991. The effects on strand exchange of 5' versus 3' ends  
1510 of single-stranded DNA in RecA nucleoprotein filaments. *J Mol Biol* **219**:645–654.  
1511 doi:10.1016/0022-2836(91)90661-o

- 1512 Ephrussi-Taylor H. 1966. Genetic recombination in DNA-induced transformation of  
1513 Pneumococcus. IV. The pattern of transmission and phenotypic expression of high and  
1514 low-efficiency donor sites in the *amiA* locus. *Genetics* **54**:211–222.
- 1515 Ephrussi-Taylor H. 1962. Appearance of Streptomycin Resistance Following the Uptake of  
1516 Transforming Deoxyribonucleic Acid in Pneumococcus. *Nature* **196**:748-752 (1962).
- 1517 Ephrussi-Taylor H. 1958. The mechanism of deoxyribonucleic acid-induced transformations.  
1518 *Recent Progress in Microbiology* 5148.
- 1519 Ephrussi-Taylor H, Gray TC. 1966. Genetic studies of recombining DNA in pneumococcal  
1520 transformation. *The Journal of general physiology* **49**:211–231. doi:10.1085/jgp.49.6.211
- 1521 Fenoll A, Ardanuy C, Liñares J, Cercenado E, Marco F, Fleites A, Rodríguez-Mayo M,  
1522 López-Hontangas J-L, Palop B, Aller A-I, Buendía B, Méndez C, Cifuentes I, Group OS.  
1523 2018. Serotypes and genotypes of *S. pneumoniae* isolates from adult invasive disease in  
1524 Spain: A 5-year prospective surveillance after pediatric PCV13 licensure. The ODIN  
1525 study. *Vaccine* **36**:7993–8000. doi:10.1016/j.vaccine.2018.10.098
- 1526 Fox MS, Allen MK. 1964. On The Mechanism Of Deoxyribonucleate Integration  
1527 In Pneumococcal Transformation. *Proceedings of the National Academy of Sciences of*  
1528 *the United States of America* **52**:412–419. doi:10.1073/pnas.52.2.412
- 1529 Gabor M, Hotchkiss RD. 1966. Manifestation of linear organization in molecules of  
1530 pneumococcal transforming DNA. *Proceedings of the National Academy of Sciences of*  
1531 *the United States of America* **56**:1441–1448. doi:10.1073/pnas.56.5.1441
- 1532 Gibson DG. 2011. Enzymatic assembly of overlapping DNA fragments. *Methods Enzymol*  
1533 **498**:349–61. doi:10.1016/b978-0-12-385120-8.00015-2
- 1534 Godeux A-S, Lupo A, Haenni M, Guette-Marquet S, Wilharm G, Laaberki M-H, Charpentier  
1535 X. 2018. Fluorescence-Based Detection of Natural Transformation in Drug-Resistant  
1536 *Acinetobacter baumannii*. *Journal of bacteriology* **200**:939. doi:10.1128/jb.00181-18
- 1537 Gómez-Mejía A, Gámez G, Hammerschmidt S. 2018. Streptococcus pneumoniae two-  
1538 component regulatory systems: The interplay of the pneumococcus with its environment.  
1539 *International journal of medical microbiology : IJMM* **308**:722–737.  
1540 doi:10.1016/j.ijmm.2017.11.012
- 1541 Gould SJ, Lewontin RC. 1979. The spandrels of San Marco and the Panglossian paradigm: a  
1542 critique of the adaptationist programme. *Proc Royal Soc Lond Ser B Biological Sci*  
1543 **205**:581–598. doi:10.1098/rspb.1979.0086
- 1544 Griffith F. 1928. The Significance of Pneumococcal Types. *The Journal of hygiene* **27**:113–  
1545 159. doi:10.1017/s0022172400031879
- 1546 Hakenbeck R, Brückner R, Denapaite D, Maurer P. 2012. Molecular mechanisms of  $\beta$ -lactam  
1547 resistance in *Streptococcus pneumoniae*. *Future microbiology* **7**:395–410.  
1548 doi:10.2217/fmb.12.2



- 1549 Hanahan D, Jessee J, Bloom FR. 1991. Plasmid transformation of *Escherichia coli* and other  
1550 bacteria. *Methods in enzymology* **204**:63–113. doi:10.1016/0076-6879(91)04006-a
- 1551 Håvarstein LS, Coomaraswamy G, Morrison DA. 1995. An unmodified heptadecapeptide  
1552 pheromone induces competence for genetic transformation in *Streptococcus pneumoniae*.  
1553 *Proceedings of the National Academy of Sciences of the United States of America*  
1554 **92**:11140–11144. doi:10.1073/pnas.92.24.11140
- 1555 Håvarstein LS, Gaustad P, Nes IF, Morrison DA. 1996. Identification of the streptococcal  
1556 competence-pheromone receptor. *Molecular microbiology* **21**:863–869.  
1557 doi:10.1046/j.1365-2958.1996.521416.x
- 1558 Hiller NL, Sá-Leão R. 2018. Puzzling Over the Pneumococcal Pangenome. *Frontiers in*  
1559 *microbiology* **9**:2580. doi:10.3389/fmicb.2018.02580
- 1560 Hui FM, Zhou L, Morrison DA. 1995. Competence for genetic transformation in  
1561 *Streptococcus pneumoniae*: organization of a regulatory locus with homology to two  
1562 lactococcal A secretion genes. *Gene* **153**:25–31. doi:10.1016/0378-1119(94)00841-f
- 1563 Humbert O, Prudhomme M, Hakenbeck R, Dowson CG, Claverys JP. 1995. Homeologous  
1564 recombination and mismatch repair during transformation in *Streptococcus pneumoniae*:  
1565 saturation of the Hex mismatch repair system. *Proceedings of the National Academy of*  
1566 *Sciences of the United States of America* **92**:9052–9056. doi:10.1073/pnas.92.20.9052
- 1567 Janoir C, Podglajen I, Kitzis MD, Poyart C, Gutmann L. 1999. In vitro exchange of  
1568 fluoroquinolone resistance determinants between *Streptococcus pneumoniae* and viridans  
1569 streptococci and genomic organization of the *parE-parC* region in *S. mitis*. *Journal of*  
1570 *Infectious Diseases* **180**:555–558. doi:10.1086/314888
- 1571 Johnston C, Martin B, Fichant G, Polard P, Claverys J-P. 2014. Bacterial transformation:  
1572 distribution, shared mechanisms and divergent control. *Nature Reviews Microbiology*  
1573 **12**:181–196. doi:10.1038/nrmicro3199
- 1574 Johnston C, Soulet A-L, Berge M, Prudhomme M, Lemos DD, Polard P. 2020. The  
1575 alternative sigma factor  $\sigma_X$  mediates competence shut-off at the cell pole in *Streptococcus*  
1576 *pneumoniae*. *Biorxiv* 2020.06.12.147637. doi:10.1101/2020.06.12.147637
- 1577 Jong IG de, Beilharz K, Kuipers OP, Veening J-W. 2011. Live Cell Imaging of *Bacillus*  
1578 *subtilis* and *Streptococcus pneumoniae* using Automated Time-lapse Microscopy. *Journal*  
1579 *of visualized experiments : JoVE*. doi:10.3791/3145
- 1580 Keller L, Rueff A, Kurushima J, Veening J. 2019. Three New Integration Vectors and  
1581 Fluorescent Proteins for Use in the Opportunistic Human Pathogen *Streptococcus*  
1582 *pneumoniae*. *Genes-basel* **10**:394. doi:10.3390/genes10050394
- 1583 Konforti BB, Davis RW. 1990. The preference for a 3' homologous end is intrinsic to RecA-  
1584 promoted strand exchange. *J Biological Chem* **265**:6916–20.
- 1585 LACKS S. 1962. Molecular fate of DNA in genetic transformation of *Pneumococcus*.  
1586 *Journal of Molecular Biology* **5**:119–131. doi:10.1016/s0022-2836(62)80067-9

- 1587 Lam T, Maienschein-Cline M, Eddington DT, Morrison DA. 2020. Multiplex gene transfer  
1588 by genetic transformation between isolated *S. pneumoniae* cells confined in microfluidic  
1589 droplets. *Integr Biology Quantitative Biosci Nano Macro*. doi:10.1093/intbio/zyz036
- 1590 Laurenceau R, Péhau-Arnaudet G, Baconnais S, Gault J, Malosse C, Dujancourt A, Campo  
1591 N, Chamot-Rooke J, Cam EL, Claverys J-P, Fronzes R. 2013. A type IV pilus mediates  
1592 DNA binding during natural transformation in *Streptococcus pneumoniae*. *PLoS*  
1593 *Pathogens* **9**:e1003473. doi:10.1371/journal.ppat.1003473
- 1594 Lee MS, Seok C, Morrison DA. 1998. Insertion-duplication mutagenesis in *Streptococcus*  
1595 *pneumoniae*: targeting fragment length is a critical parameter in use as a random insertion  
1596 tool. *Applied and Environmental Microbiology* **64**:4796–4802.
- 1597 Lefevre JC, Claverys JP, Sicard AM. 1979. Donor deoxyribonucleic acid length and marker  
1598 effect in pneumococcal transformation. *J Bacteriol* **138**:80–6.
- 1599 Levy C, Ouldali N, Caeymaex L, Angoulvant F, Varon E, Cohen R. 2019. Diversity of  
1600 Serotype Replacement After Pneumococcal Conjugate Vaccine Implementation in Europe.  
1601 *The Journal of pediatrics* **213**:252-253.e3. doi:10.1016/j.jpeds.2019.07.057
- 1602 Lin M, Kussell E. 2017. Correlated Mutations and Homologous Recombination Within  
1603 Bacterial Populations. *Genetics* **205**:891–917. doi:10.1534/genetics.116.189621
- 1604 Litt M, Marmur J, Ephrussi-Taylor H, Doty P. 1958. The Dependence of Peumococcal  
1605 Transformation on The Molecular Weight of Deoxyribose Nucleic Acid. *Proceedings of*  
1606 *the National Academy of Sciences of the United States of America* **44**:144–152.  
1607 doi:10.1073/pnas.44.2.144
- 1608 Liu X, Gallay C, Kjos M, Domenech A, Slager J, Kessel SP van, Knoop K, Sorg RA, Zhang  
1609 J-R, Veening J-W. 2017. High-throughput CRISPRi phenotyping identifies new essential  
1610 genes in *Streptococcus pneumoniae*. *Molecular systems biology* **13**:931.  
1611 doi:10.15252/msb.20167449
- 1612 Liu Y, Zeng Y, Huang Y, Gu L, Wang S, Li C, Morrison DA, Deng H, Zhang J-R. 2019.  
1613 HtrA-mediated selective degradation of DNA uptake apparatus accelerates termination of  
1614 pneumococcal transformation. *Molecular microbiology* **112**:1308–1325.  
1615 doi:10.1111/mmi.14364
- 1616 Lo SW, Gladstone RA, Tonder AJ van, Plessis MD, Cornick JE, Hawkins PA, Madhi SA,  
1617 Nzenze SA, Kandasamy R, Ravikumar KL, Elmdaghri N, Kwambana-Adams B, Almeida  
1618 SCG, Skoczynska A, Egorova E, Titov L, Saha SK, Paragi M, Everett DB, Antonio M,  
1619 Klugman KP, Li Y, Metcalf BJ, Beall B, McGee L, Breiman RF, Bentley SD, Gottberg A  
1620 von, Global Pneumococcal Sequencing Consortium. 2019. A mosaic tetracycline  
1621 resistance gene tet(S/M) detected in an MDR pneumococcal CC230 lineage that  
1622 underwent capsular switching in South Africa. *The Journal of antimicrobial*  
1623 *chemotherapy* **19**:759. doi:10.1093/jac/dkz477
- 1624 Luo P, Li H, Morrison DA. 2003. ComX is a unique link between multiple quorum sensing  
1625 outputs and competence in *Streptococcus pneumoniae*. *Molecular microbiology* **50**:623–  
1626 633. doi:10.1046/j.1365-2958.2003.03714.x

- 1627 Maamar H, Dubnau D. 2005. Bistability in the *Bacillus subtilis* K-state (competence) system  
1628 requires a positive feedback loop. *Molecular microbiology* **56**:615–624.  
1629 doi:10.1111/j.1365-2958.2005.04592.x
- 1630 Marie L, Rapisarda C, Morales V, Berge M, Perry T, Soulet A-L, Gruget C, Remaut H,  
1631 Fronzes R, Polard P. 2017. Bacterial RadA is a DnaB-type helicase interacting with RecA  
1632 to promote bidirectional D-loop extension. *Nature communications* **8**:15638–14.  
1633 doi:10.1038/ncomms15638
- 1634 Martin B, Granadel C, Campo N, Hénard V, Prudhomme M, Claverys J-P. 2010. Expression  
1635 and maintenance of ComD-ComE, the two-component signal-transduction system that  
1636 controls competence of *Streptococcus pneumoniae*. *Molecular microbiology* **75**:1513–  
1637 1528. doi:10.1111/j.1365-2958.2010.07071.x
- 1638 Martin B, Soulet A-L, Mirouze N, Prudhomme M, Mortier-Barrière I, Granadel C, Noirot-  
1639 Gros M-F, Noirot P, Polard P, Claverys J-P. 2013. ComE/ComE~P interplay dictates  
1640 activation or extinction status of pneumococcal X-state (competence). *Molecular*  
1641 *microbiology* **87**:394–411. doi:10.1111/mmi.12104
- 1642 Méjean V, Claverys JP. 1984. Use of a cloned DNA fragment to analyze the fate of donor  
1643 DNA in transformation of *Streptococcus pneumoniae*. *Journal of bacteriology* **158**:1175–  
1644 1178.
- 1645 Mell JC, Redfield RJ. 2014. Natural competence and the evolution of DNA uptake specificity.  
1646 *Journal of bacteriology* **196**:1471–1483. doi:10.1128/jb.01293-13
- 1647 Mirouze N, Bergé MA, Soulet A-L, Mortier-Barrière I, Quentin Y, Fichant G, Granadel C,  
1648 Noirot-Gros M-F, Noirot P, Polard P, Martin B, Claverys J-P. 2013. Direct involvement of  
1649 DprA, the transformation-dedicated RecA loader, in the shut-off of pneumococcal  
1650 competence. *Proceedings of the National Academy of Sciences of the United States of*  
1651 *America* **110**:E1035-44. doi:10.1073/pnas.1219868110
- 1652 Moreno-Gámez S, Sorg RA, Domenech A, Kjos M, Weissing FJ, Doorn GS van, Veening J-  
1653 W. 2017. Quorum sensing integrates environmental cues, cell density and cell history to  
1654 control bacterial competence. *Nature communications* **8**:854. doi:10.1038/s41467-017-  
1655 00903-y
- 1656 Mortier-Barrière I, Saizieu A de, Claverys JP, Martin B. 1998. Competence-specific  
1657 induction of *recA* is required for full recombination proficiency during transformation in  
1658 *Streptococcus pneumoniae*. *Molecular microbiology* **27**:159–170. doi:10.1046/j.1365-  
1659 2958.1998.00668.x
- 1660 Mortier-Barrière I, Velten M, Dupaigne P, Mirouze N, Piétrement O, McGovern S, Fichant G,  
1661 Martin B, Noirot P, Cam EL, Polard P, Claverys J-P. 2007. A key presynaptic role in  
1662 transformation for a widespread bacterial protein: DprA conveys incoming ssDNA to  
1663 RecA. *Cell* **130**:824–836. doi:10.1016/j.cell.2007.07.038
- 1664 O'Brien KL, Wolfson LJ, Watt JP, Henkle E, Deloria-Knoll M, McCall N, Lee E,  
1665 Mulholland K, Levine OS, Cherian T, Team H and PGB of DS. 2009. Burden of disease

- 1666 caused by *Streptococcus pneumoniae* in children younger than 5 years: global estimates.  
1667 *Lancet (London, England)* **374**:893–902. doi:10.1016/s0140-6736(09)61204-6
- 1668 Ouldali N, Levy C, Varon E, Bonacorsi S, Béchet S, Cohen R, Angoulvant F, Network FPM.  
1669 2018. Incidence of paediatric pneumococcal meningitis and emergence of new serotypes:  
1670 a time-series analysis of a 16-year French national survey. *The Lancet Infectious diseases*  
1671 **18**:983–991. doi:10.1016/s1473-3099(18)30349-9
- 1672 Paintdakhi A, Parry B, Campos M, Irnov I, Elf J, Surovtsev I, Jacobs-Wagner C. 2016. Oufiti:  
1673 an integrated software package for high-accuracy, high-throughput quantitative  
1674 microscopy analysis. *Molecular microbiology* **99**:767–777. doi:10.1111/mmi.13264
- 1675 Pestova EV, Håvarstein LS, Morrison DA. 1996. Regulation of competence for genetic  
1676 transformation in *Streptococcus pneumoniae* by an auto-induced peptide pheromone and a  
1677 two-component regulatory system. *Molecular microbiology* **21**:853–862.  
1678 doi:10.1046/j.1365-2958.1996.501417.x
- 1679 Pestova EV, Morrison DA. 1998. Isolation and characterization of three *Streptococcus*  
1680 *pneumoniae* transformation-specific loci by use of a *lacZ* reporter insertion vector.  
1681 *Journal of bacteriology* **180**:2701–2710.
- 1682 Petit MA, Dimpfl J, Radman M, Echols H. 1991. Control of large chromosomal duplications  
1683 in *Escherichia coli* by the mismatch repair system. *Genetics* **129**:327–332.
- 1684 Piechowska M, Fox MS. 1971. Fate of transforming deoxyribonucleate in *Bacillus subtilis*.  
1685 *Journal of bacteriology* **108**:680–689.
- 1686 Porter RD, Guild WR. 1969. Number of transformable units per cell in *Diplococcus*  
1687 *pneumoniae*. *Journal of bacteriology* **97**:1033–1035.
- 1688 Prina E, Ranzani OT, Torres A. 2015. Community-acquired pneumonia. *Lancet (London,*  
1689 *England)* **386**:1097–1108. doi:10.1016/s0140-6736(15)60733-4
- 1690 Puyet A, Greenberg B, Lacks SA. 1990. Genetic and structural characterization of endA. A  
1691 membrane-bound nuclease required for transformation of *Streptococcus pneumoniae*.  
1692 *Journal of Molecular Biology* **213**:727–738. doi:10.1016/s0022-2836(05)80259-1
- 1693 Raaphorst R, Kjos M, Veening J. 2017. Chromosome segregation drives division site  
1694 selection in *Streptococcus pneumoniae*. *P Natl Acad Sci Usa* **114**:E5959–E5968.  
1695 doi:10.1073/pnas.1620608114
- 1696 Raaphorst R van, Kjos M, Veening J-W. 2020. BactMAP: An R package for integrating,  
1697 analyzing and visualizing bacterial microscopy data. *Molecular microbiology* **11**:2699.  
1698 doi:10.1111/mmi.14417
- 1699 Salvadori G, Junges R, Morrison DA, Petersen FC. 2019. Competence in *Streptococcus*  
1700 *pneumoniae* and Close Commensal Relatives: Mechanisms and Implications. *Frontiers in*  
1701 *cellular and infection microbiology* **9**:94. doi:10.3389/fcimb.2019.00094

- 1702 Sanchez D, Boudes M, Tilbeurgh H van, Durand D, Quevillon-Cheruel S. 2015. Modeling  
1703 the ComD/ComE/comcde interaction network using small angle X-ray scattering. *The*  
1704 *FEBS journal* **282**:1538–1553. doi:10.1111/febs.13240
- 1705 Schindelin J, Arganda-Carreras I, Frise E, Kaynig V, Longair M, Pietzsch T, Preibisch S,  
1706 Rueden C, Saalfeld S, Schmid B, Tinevez J-Y, White DJ, Hartenstein V, Eliceiri K,  
1707 Tomancak P, Cardona A. 2012. Fiji: an open-source platform for biological-image  
1708 analysis. *Nature methods* **9**:676–682. doi:10.1038/nmeth.2019
- 1709 Shanker E, Federle MJ. 2017. Quorum Sensing Regulation of Competence and Bacteriocins  
1710 in *Streptococcus pneumoniae* and mutants. *Genes* **8**:15. doi:10.3390/genes8010015
- 1711 Slager J, Aprianto R, Veening J-W. 2019. Refining the pneumococcal competence regulon by  
1712 RNA-sequencing. *Journal of bacteriology* JB.00780-18. doi:10.1128/jb.00780-18
- 1713 Slager J, Aprianto R, Veening J-W. 2018. Deep genome annotation of the opportunistic  
1714 human pathogen *Streptococcus pneumoniae* D39. *Nucleic acids research* **46**:9971–9989.  
1715 doi:10.1093/nar/gky725
- 1716 Slager J, Kjos M, Attaiech L, Veening J-W. 2014. Antibiotic-induced replication stress  
1717 triggers bacterial competence by increasing gene dosage near the origin. *Cell* **157**:395–406.  
1718 doi:10.1016/j.cell.2014.01.068
- 1719 Smits WK, Eschevins CC, Susanna KA, Bron S, Kuipers OP, Hamoen LW. 2005. Stripping  
1720 *Bacillus*: ComK auto-stimulation is responsible for the bistable response in competence  
1721 development. *Molecular microbiology* **56**:604–614. doi:10.1111/j.1365-  
1722 2958.2005.04488.x
- 1723 Sorg RA, Kuipers OP, Veening J-W. 2015. Gene expression platform for synthetic biology in  
1724 the human pathogen *Streptococcus pneumoniae*. *ACS synthetic biology* **4**:228–239.  
1725 doi:10.1021/sb500229s
- 1726 Straume D, Stamsås GA, Håvarstein LS. 2015. Natural transformation and genome evolution  
1727 in *Streptococcus pneumoniae*. *Infection, genetics and evolution : journal of molecular*  
1728 *epidemiology and evolutionary genetics in infectious diseases* **33**:371–380.  
1729 doi:10.1016/j.meegid.2014.10.020
- 1730 Stylianidou S, Brennan C, Nissen SB, Kuwada NJ, Wiggins PA. 2016. SuperSegger: robust  
1731 image segmentation, analysis and lineage tracking of bacterial cells. *Molecular*  
1732 *microbiology* **102**:690–700. doi:10.1111/mmi.13486
- 1733 Tomasz A. 1966. Model for the mechanism controlling the expression of competent state in  
1734 *Pneumococcus* cultures. *Journal of bacteriology* **91**:1050–1061.
- 1735 Uptain SM, Chamberlin MJ. 1997. *Escherichia coli* RNA polymerase terminates transcription  
1736 efficiently at rho-independent terminators on single-stranded DNA templates. *Proc*  
1737 *National Acad Sci* **94**:13548–13553. doi:10.1073/pnas.94.25.13548

- 1738 Veening J-W, Blokesch M. 2017. Interbacterial predation as a strategy for DNA acquisition  
1739 in naturally competent bacteria. *Nature Reviews Microbiology* **15**:629–629.  
1740 doi:10.1038/nrmicro.2017.89
- 1741 Ween O, Gaustad P, Håvarstein LS. 1999. Identification of DNA binding sites for ComE, a  
1742 key regulator of natural competence in *Streptococcus pneumoniae*. *Molecular*  
1743 *microbiology* **33**:817–827. doi:10.1046/j.1365-2958.1999.01528.x
- 1744 Weng L, Piotrowski A, Morrison DA. 2013. Exit from competence for genetic transformation  
1745 in *Streptococcus pneumoniae* is regulated at multiple levels. *PloS one* **8**:e64197.  
1746 doi:10.1371/journal.pone.0064197

1747

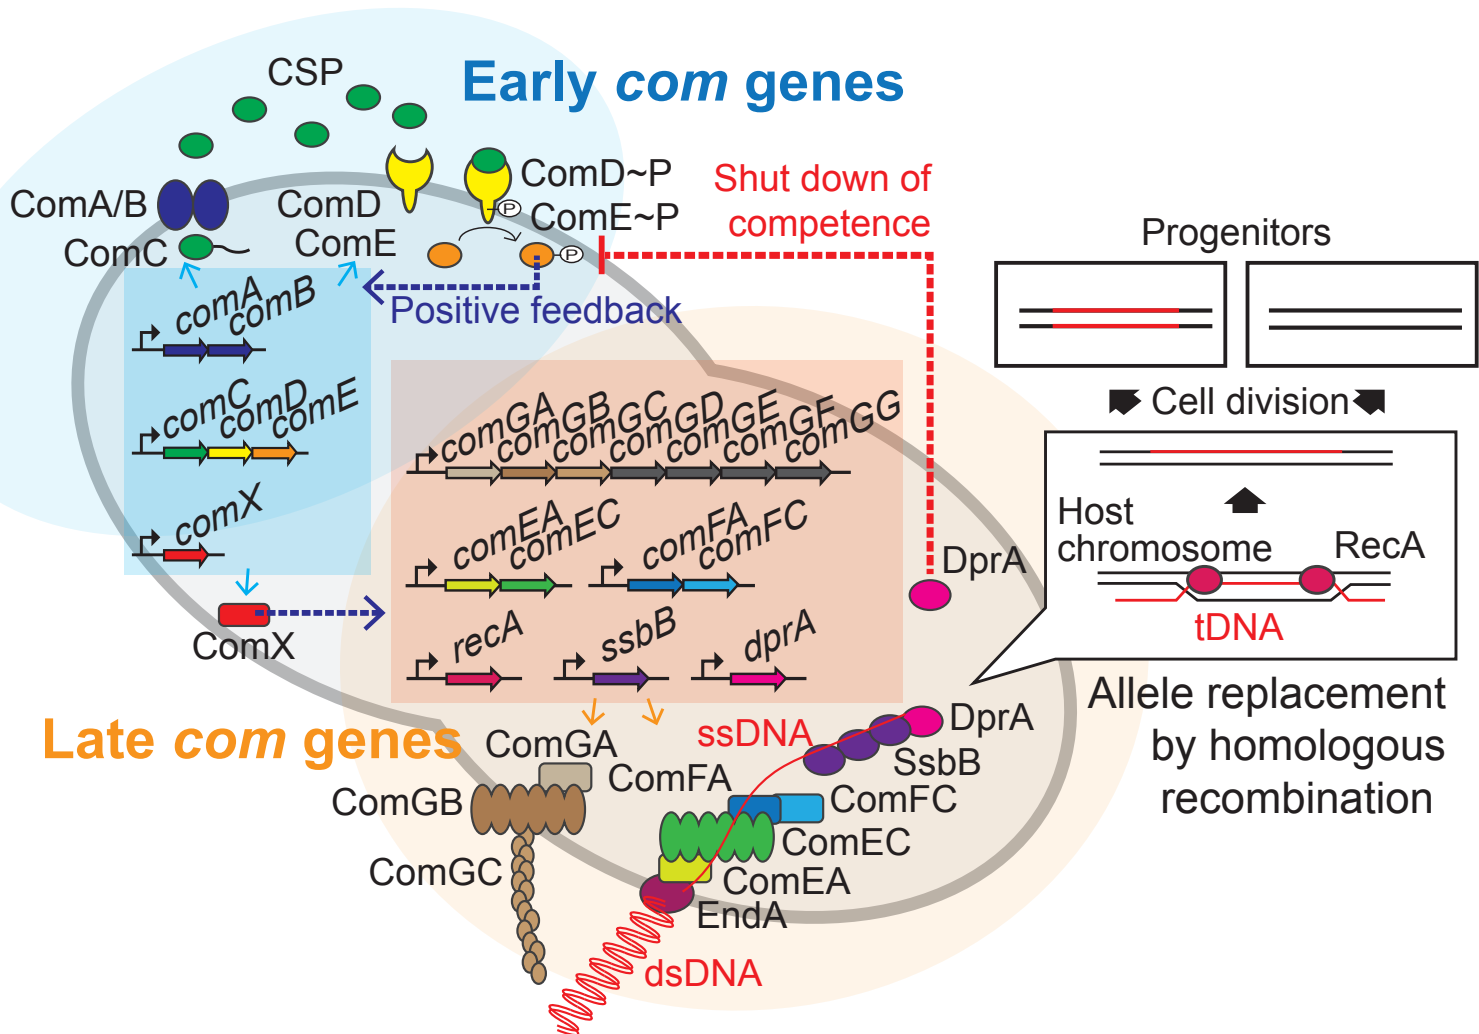

**A**

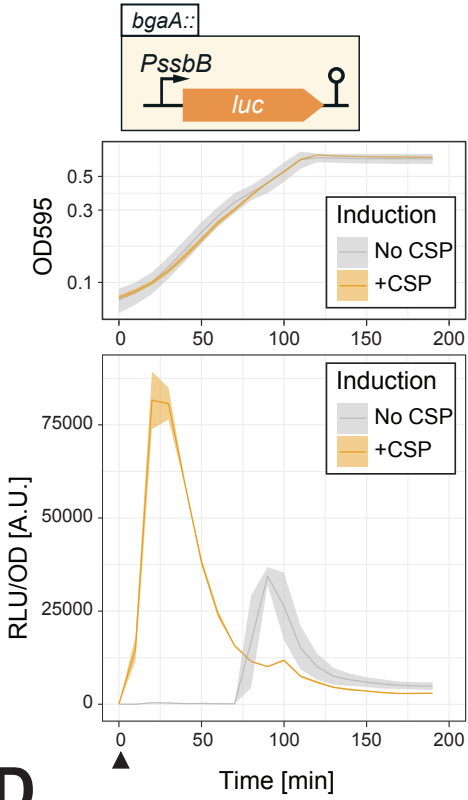

**B**

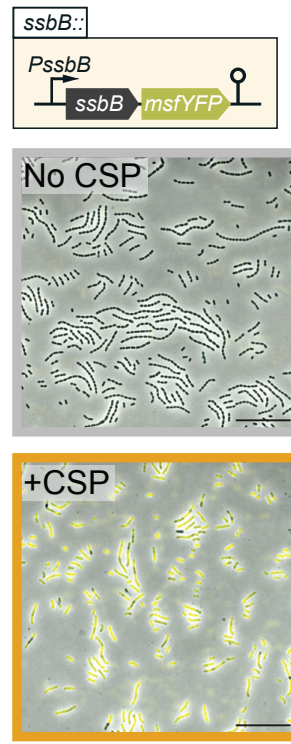

**C**

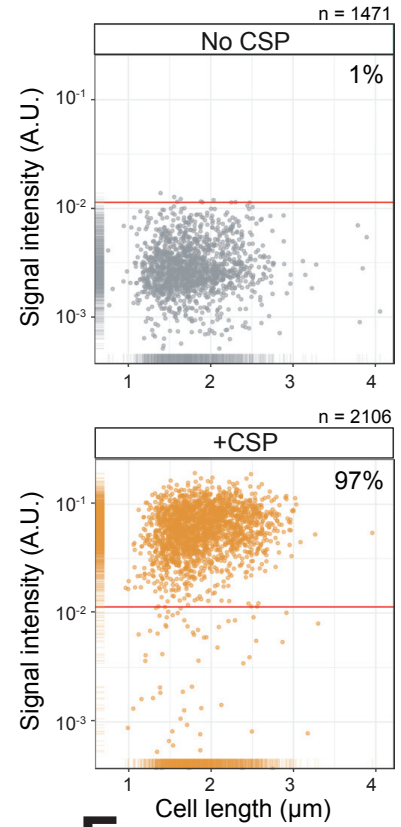

**D**

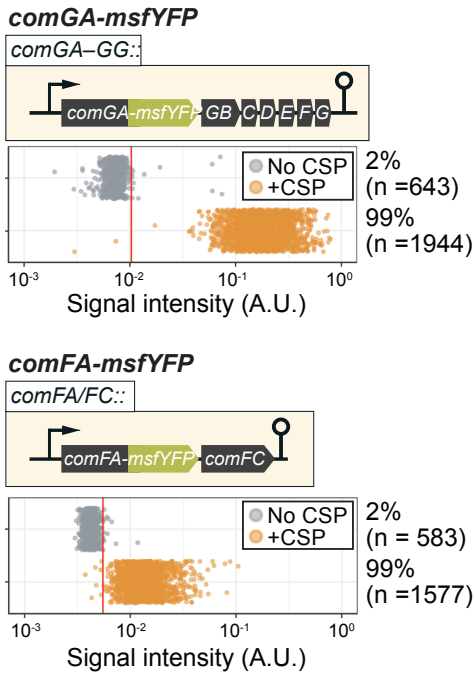

**E**

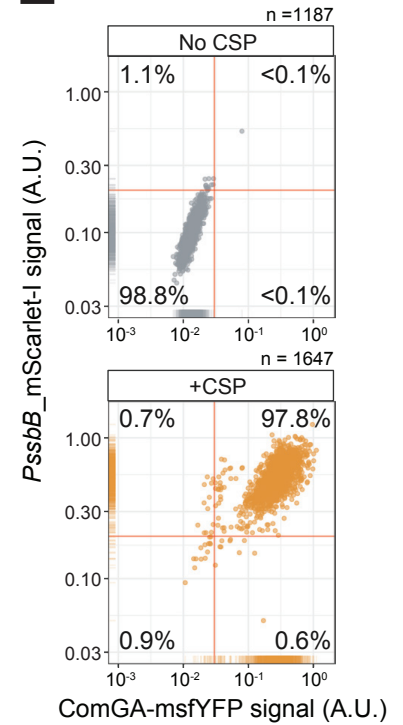

**F**

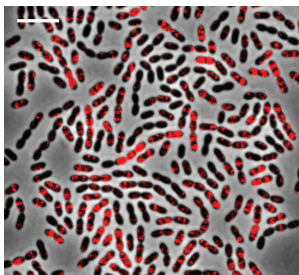

**G**

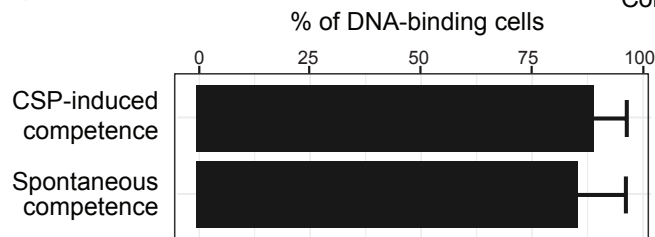



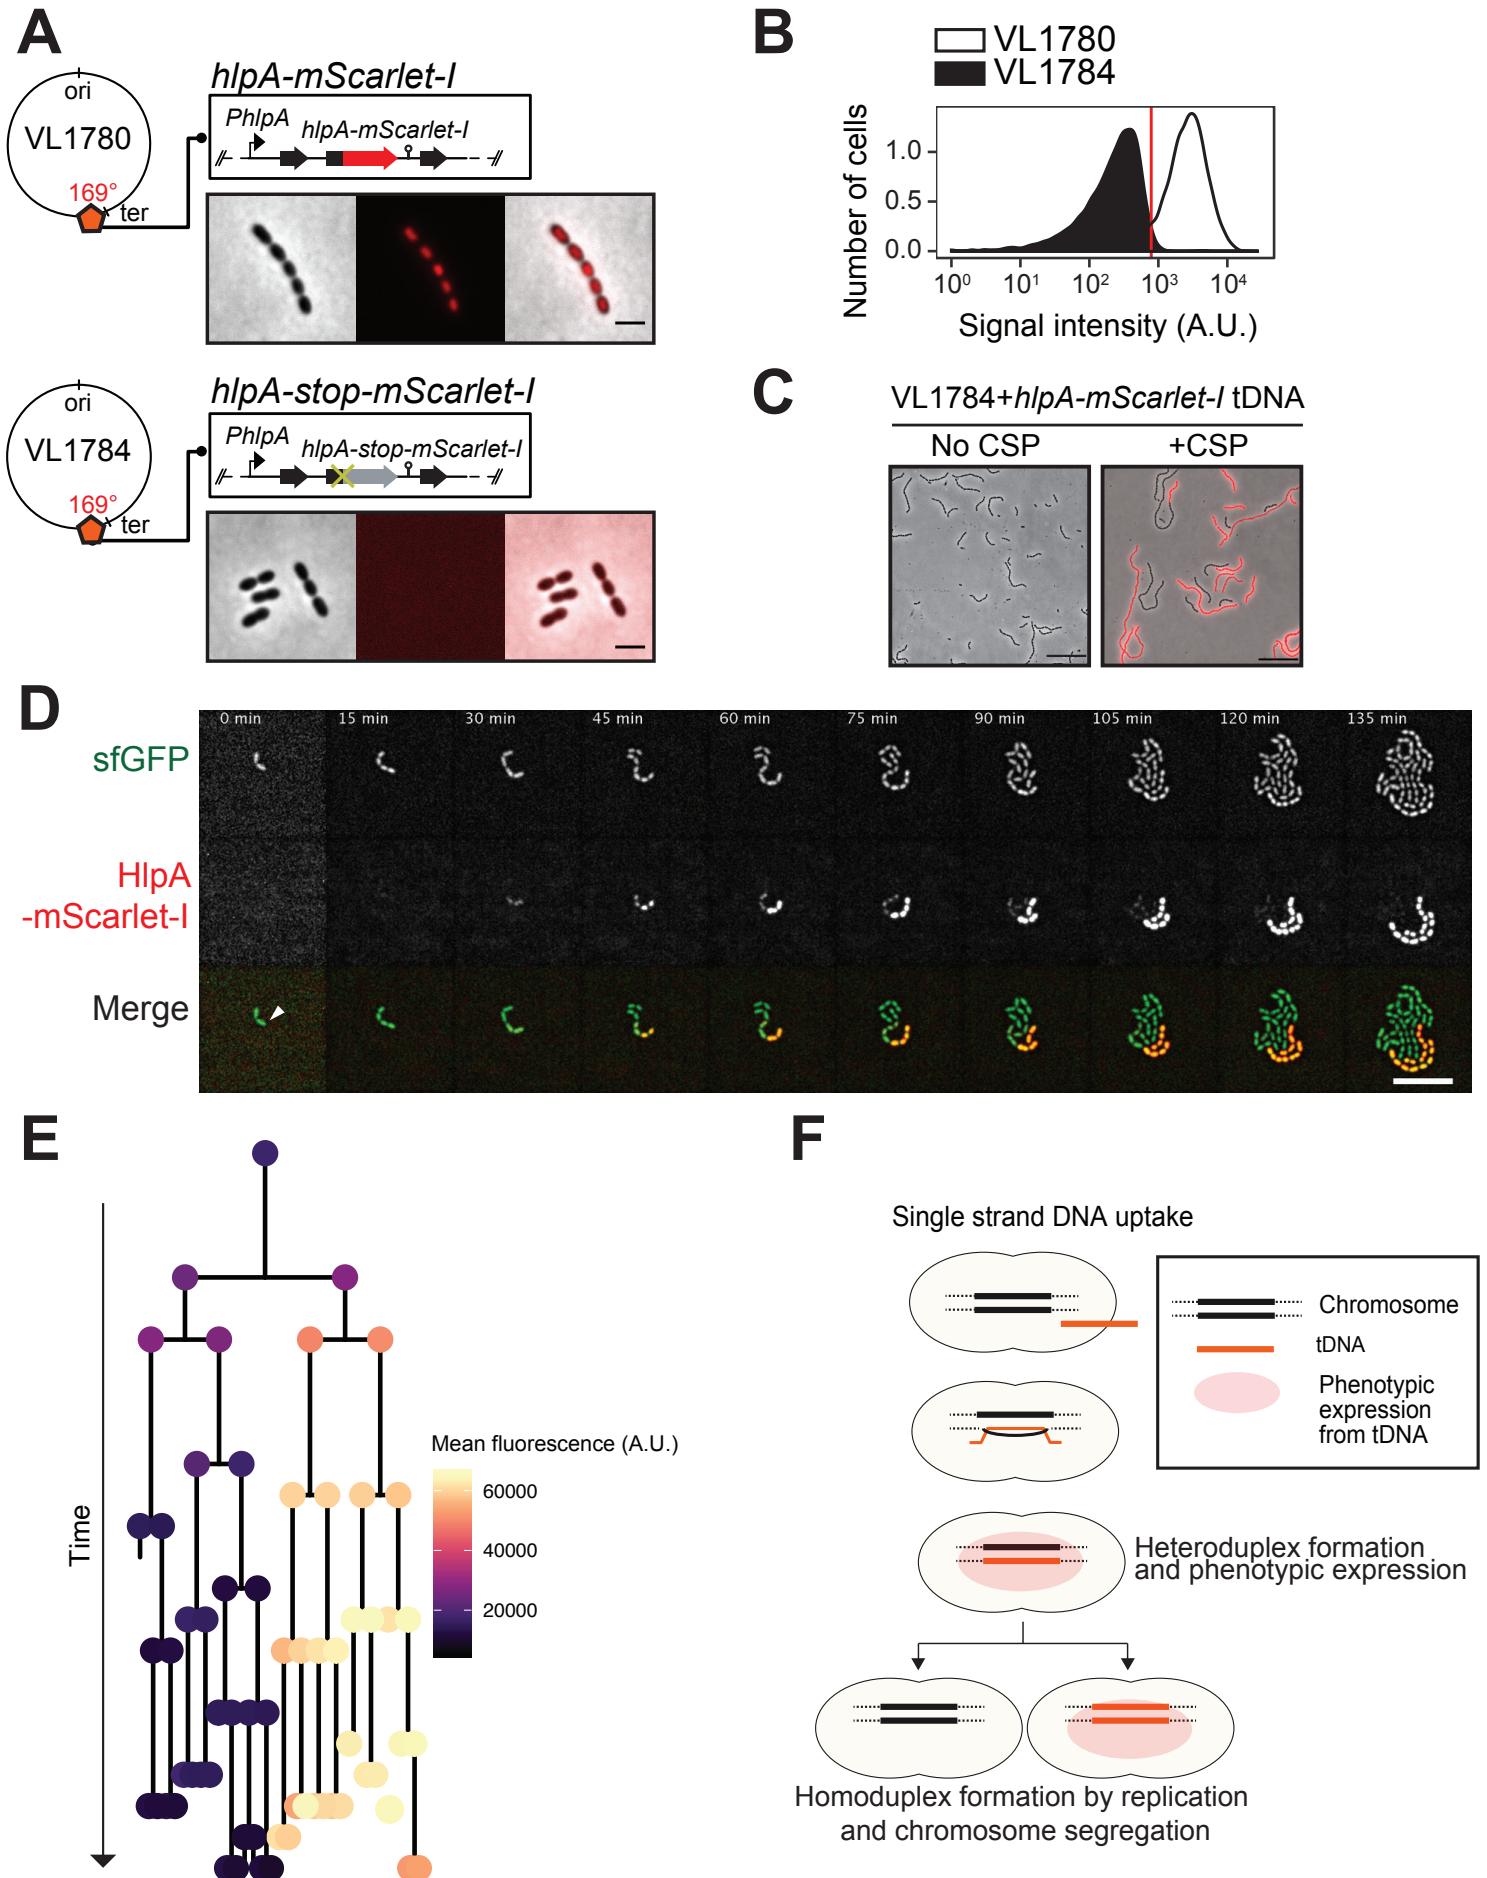

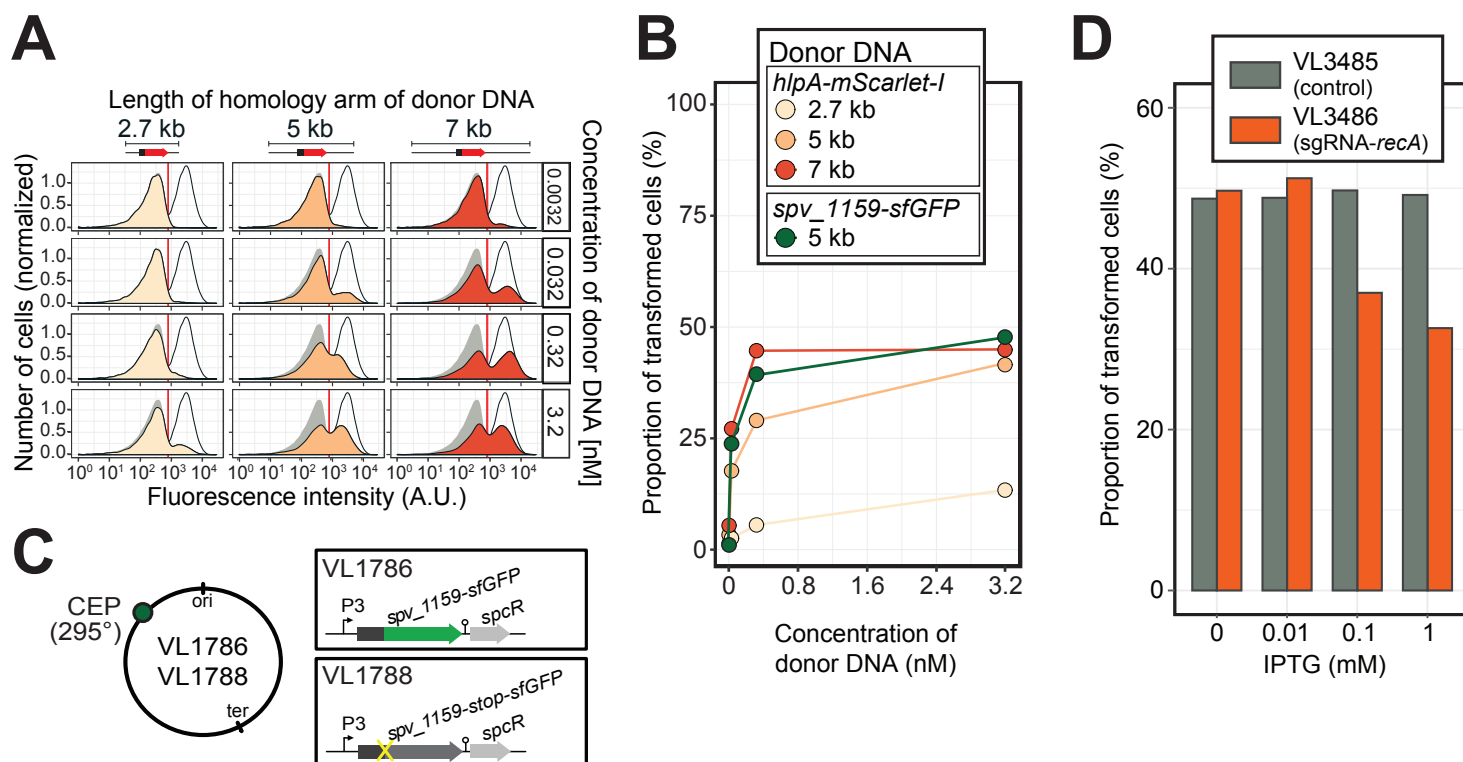

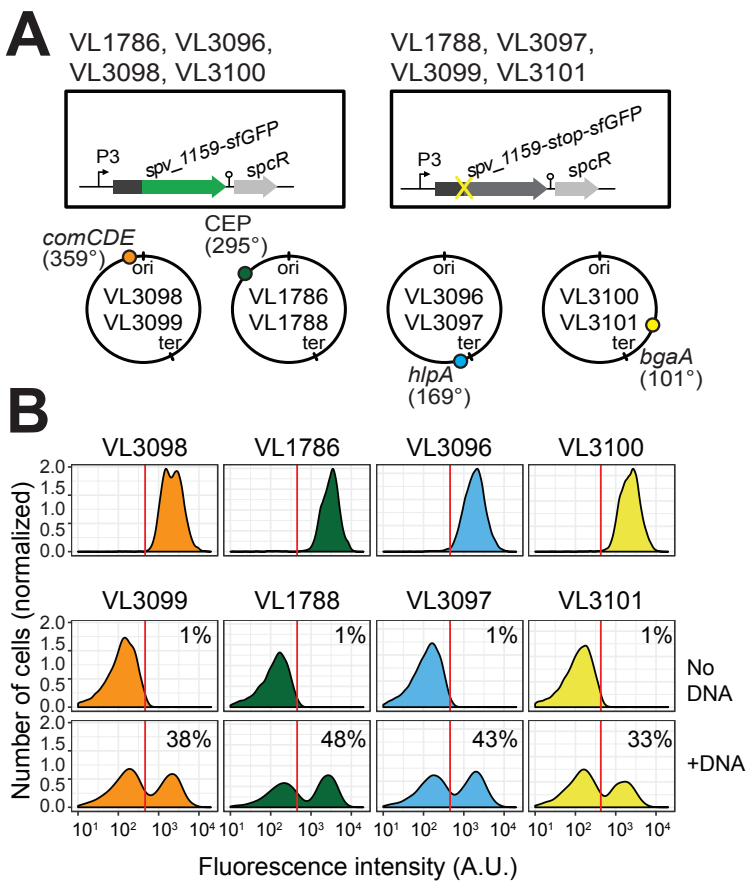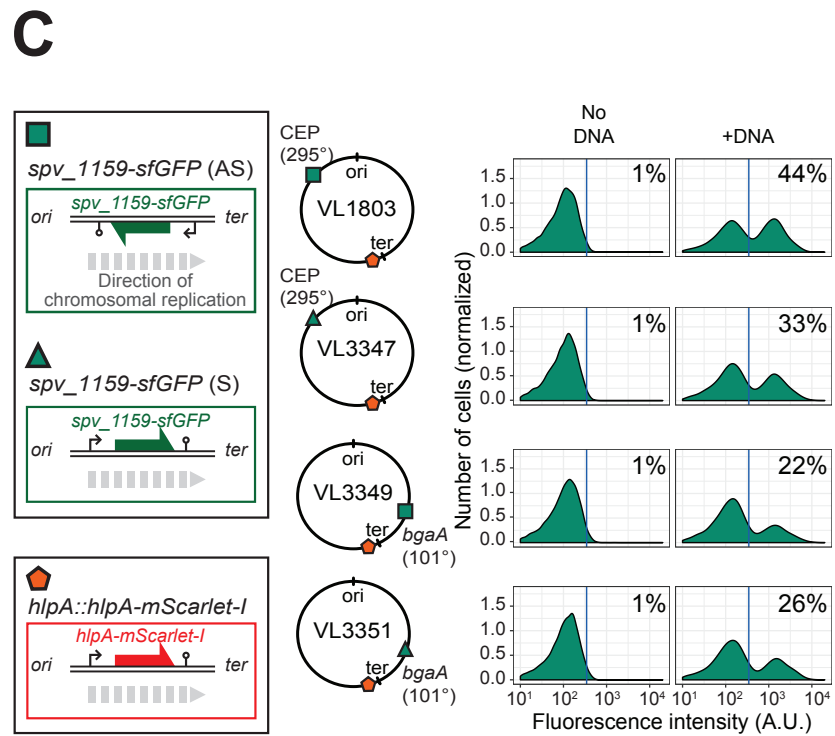

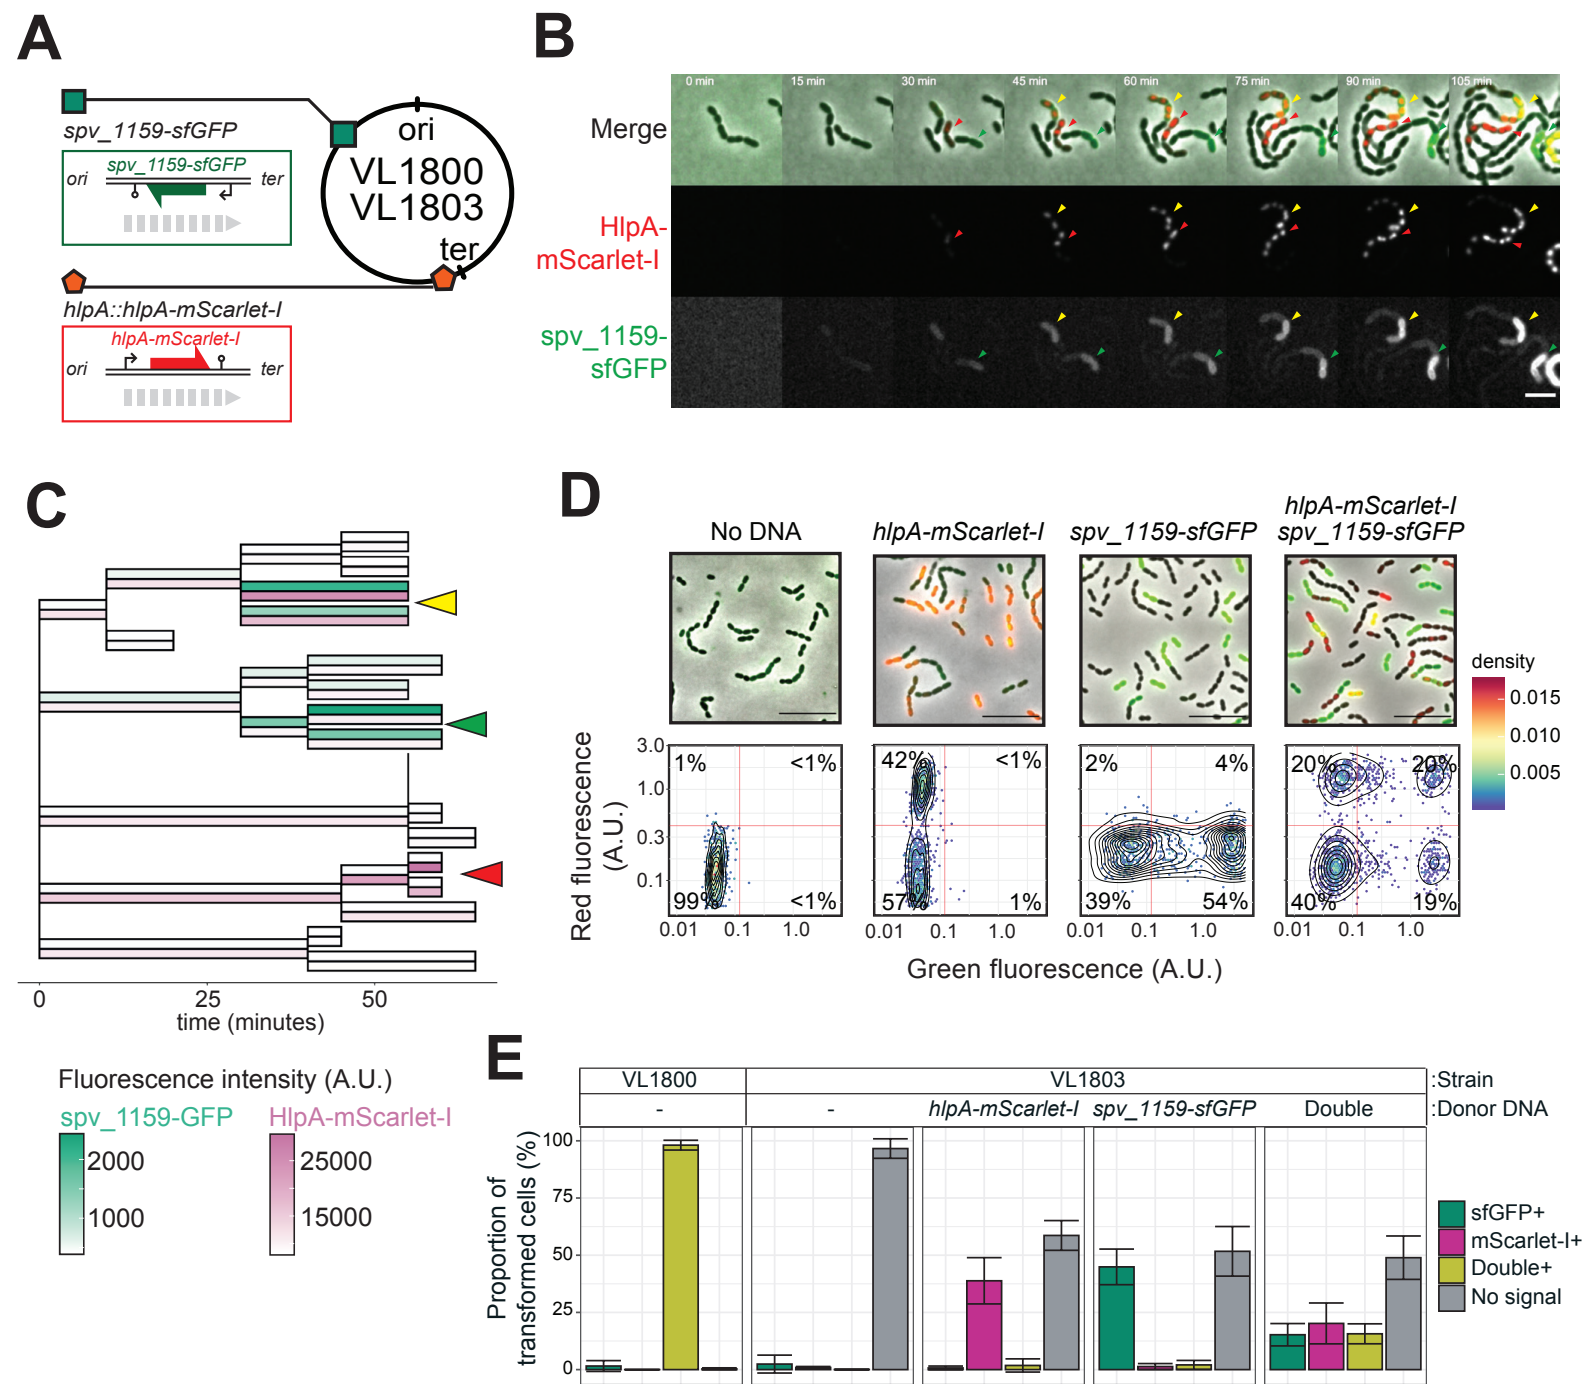

**A**

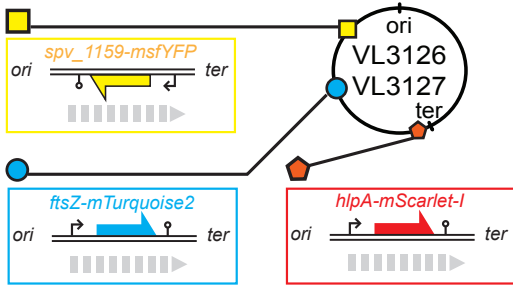

**B**

VL3127 transformed with the three fragments

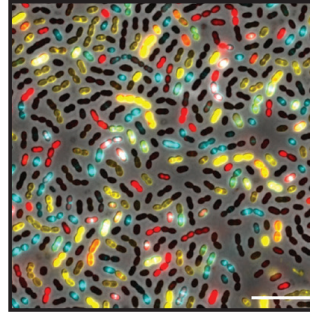

**E**

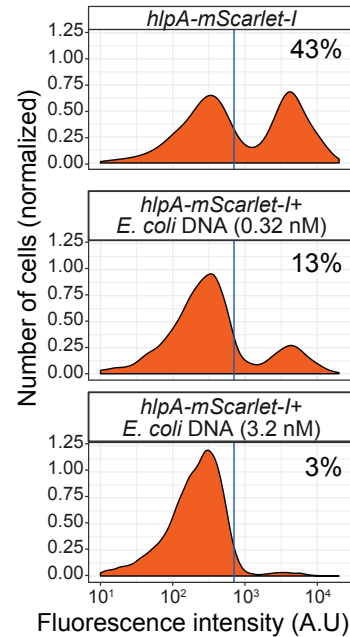

**C**

| Strain |             | Proportion of transformed cells (%) |            |             |               |            |              |            |             |
|--------|-------------|-------------------------------------|------------|-------------|---------------|------------|--------------|------------|-------------|
|        |             | Single                              |            |             | Double        |            |              | Triple     | No Signal   |
|        |             | Cyan                                | Yellow     | Red         | Cyan + Yellow | Cyan + Red | Yellow + Red |            |             |
| VL3126 | No          | 0.1 ± 0.2                           | 0.0 ± 0.0  | 0.0 ± 0.0   | 0.5 ± 0.3     | 0.1 ± 0.2  | 0.3 ± 0.5    | 98.9 ± 1.1 | 0.0 ± 0.1   |
|        | ftsZ-mTg    | 0.1 ± 0.1                           | 0.0 ± 0.0  | 0.0 ± 0.0   | 0.0 ± 0.0     | 0.1 ± 0.1  | 0.0 ± 0.0    | 0.0 ± 0.1  | 99.7 ± 0.2  |
|        | 1159-msfYFP | 42.6 ± 4.8                          | 0.0 ± 0.0  | 0.0 ± 0.0   | 0.0 ± 0.0     | 0.0 ± 0.0  | 0.0 ± 0.0    | 0.0 ± 0.0  | 57.3 ± 4.7  |
|        | hlpA-mSc    | 0.0 ± 0.0                           | 25.7 ± 9.6 | 0.3 ± 0.5   | 0.0 ± 0.0     | 0.0 ± 0.0  | 0.0 ± 0.0    | 0.3 ± 0.3  | 73.8 ± 9.7  |
|        | triple      | 0.0 ± 0.0                           | 0.0 ± 0.0  | 35.5 ± 10.3 | 0.0 ± 0.0     | 0.0 ± 0.0  | 0.1 ± 0.1    | 0.0 ± 0.0  | 64.4 ± 10.4 |
| VL3127 |             | 12.7 ± 2.3                          | 7.7 ± 5.4  | 11.0 ± 9.4  | 2.2 ± 0.9     | 4.1 ± 2.7  | 2.1 ± 1.8    | 1.5 ± 1.1  | 58.7 ± 13.4 |

**D**

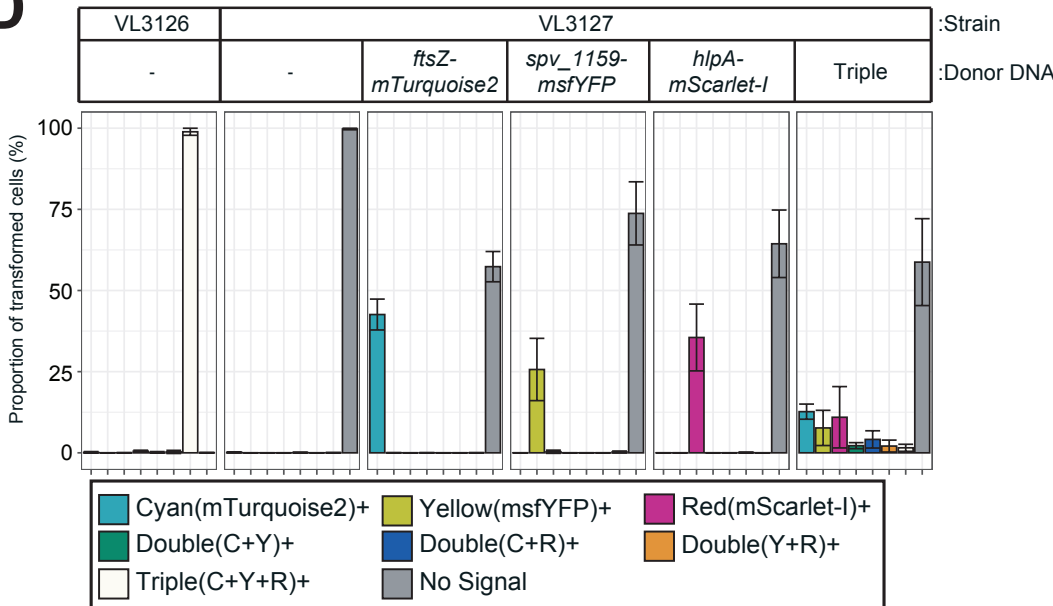

**F**

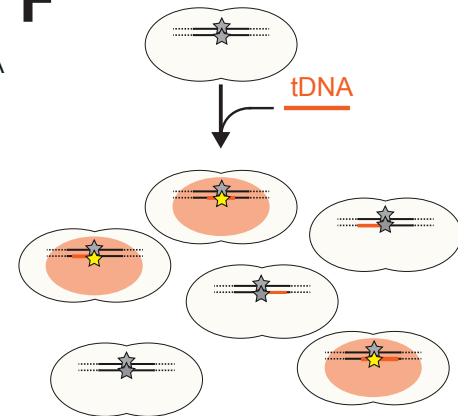

**A**

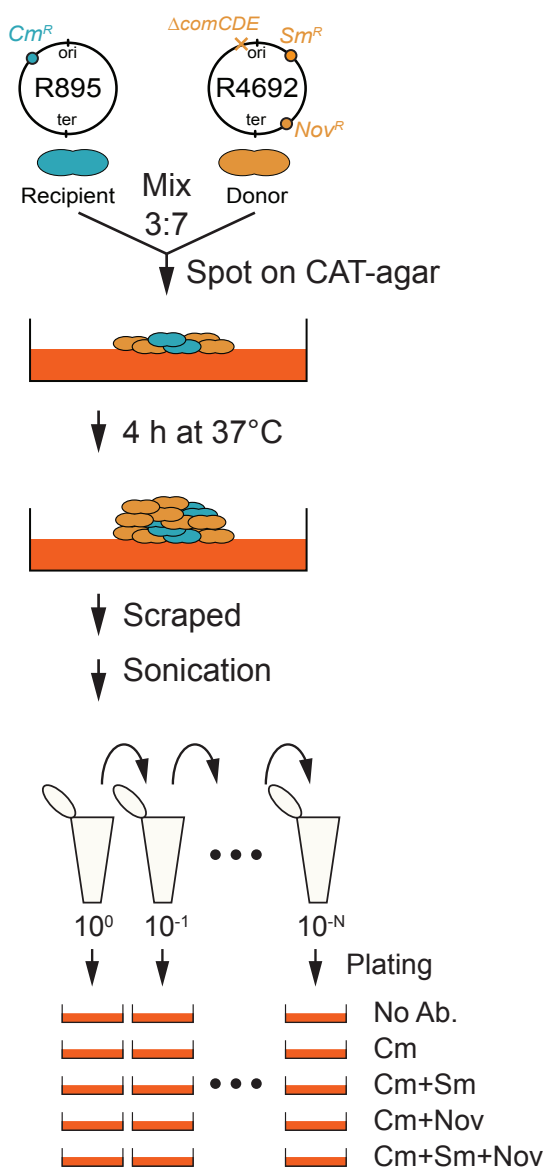

**B**

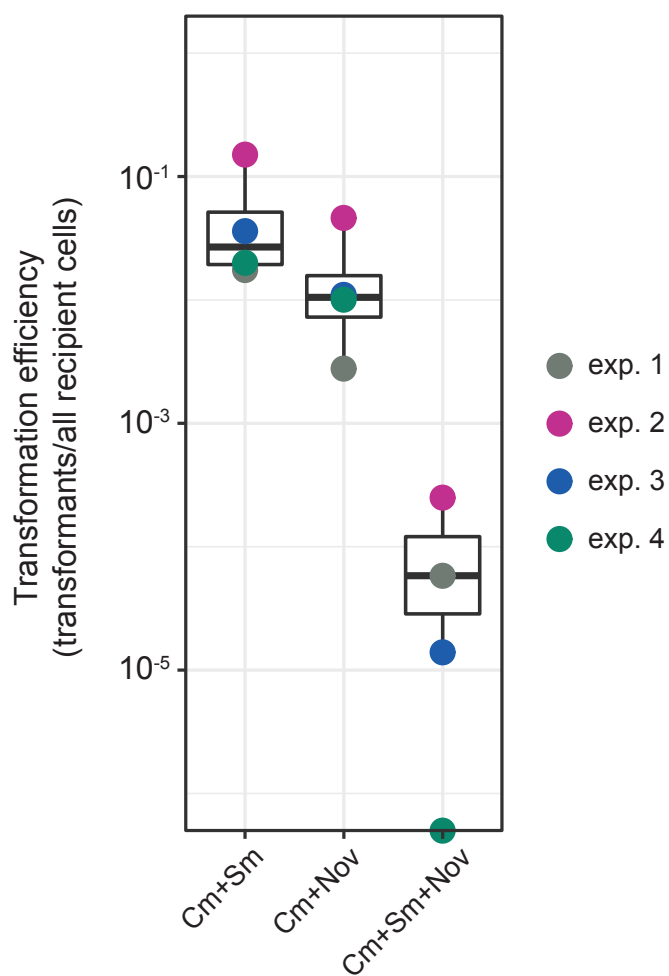

## Figure 2–figure supplement 1

**a**

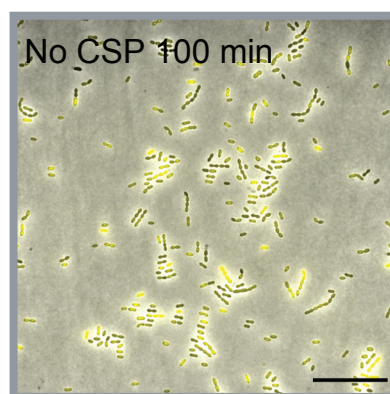

**b**

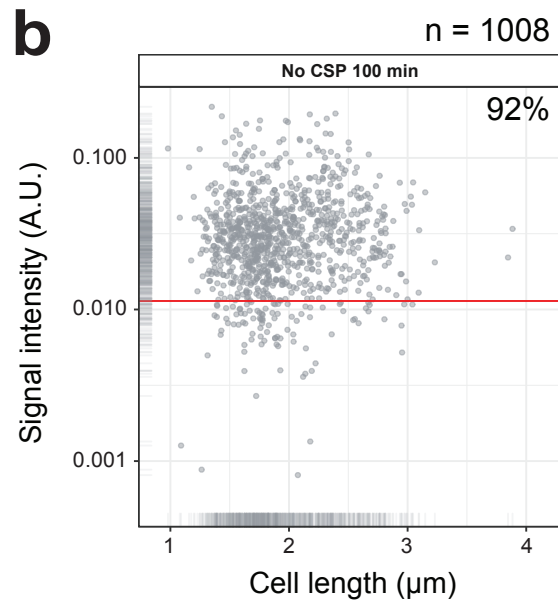

# Figure 2—figure supplement 2

D39V; *comGA::comGA-msfYFP*

*comGA-GG::*

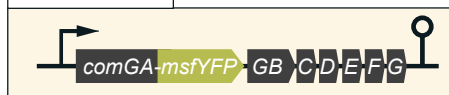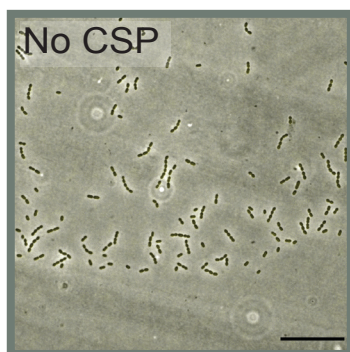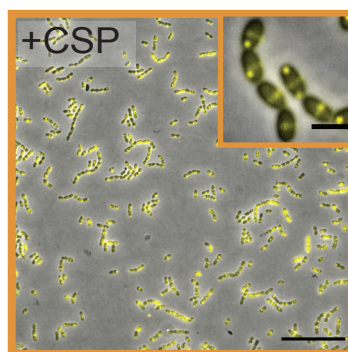

D39V; *dprA::dprA-msfYFP*

*dprA::*

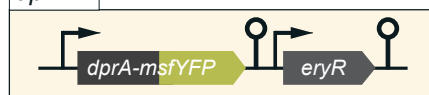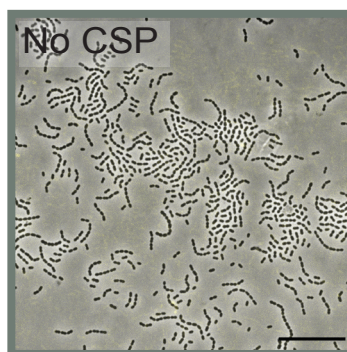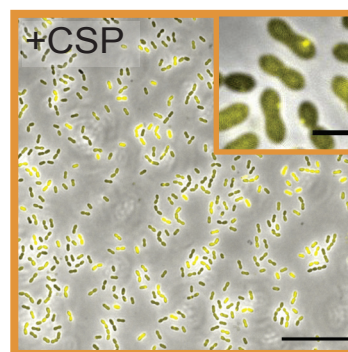

D39V; *comEA::msfYFP-comEA*

*comEA/EC::*

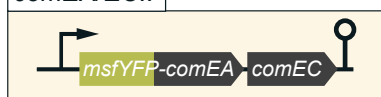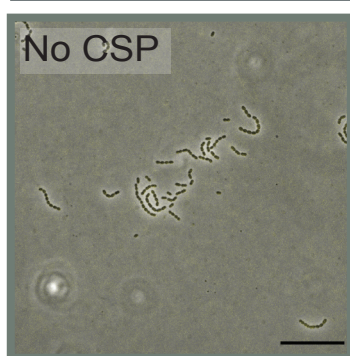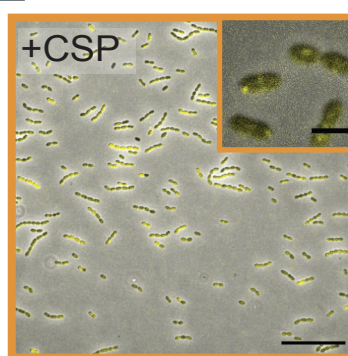

D39V; *recA::recA-mCherry*

*cinA/recA/dinF/lytA::*

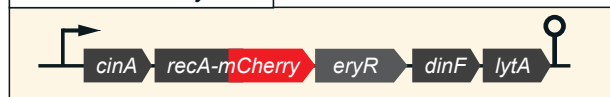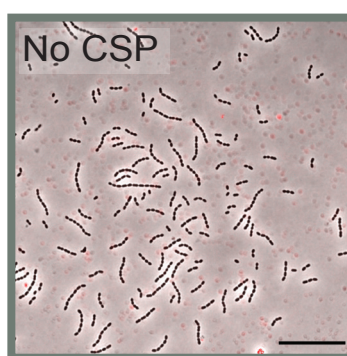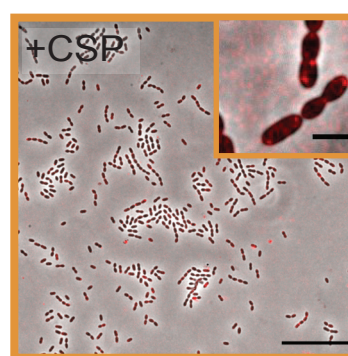

D39V; *comFA::comFA-msfYFP*

*comFA/FC::*

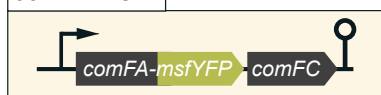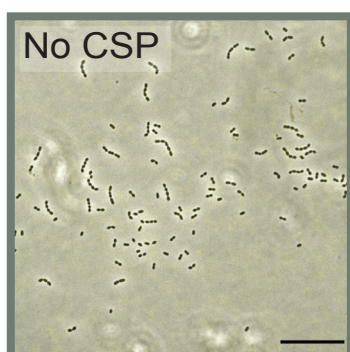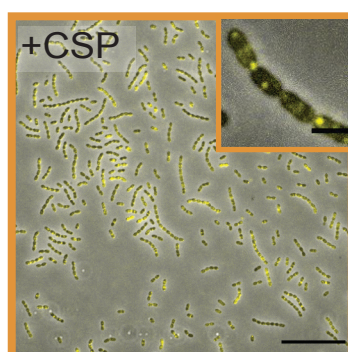



## Figure 3–figure supplement 1

**a**

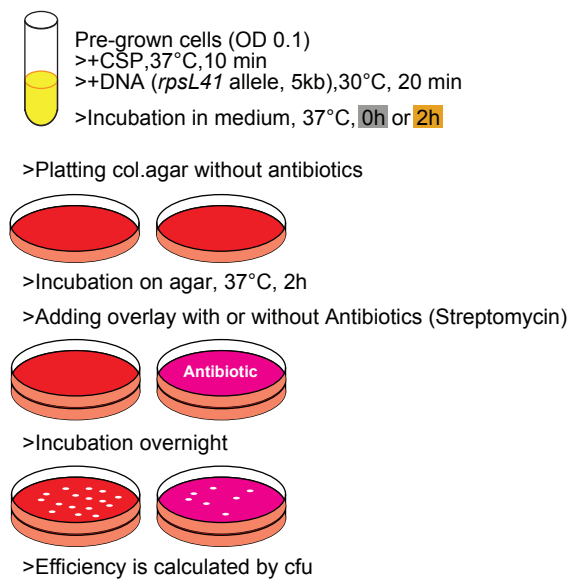

**b**

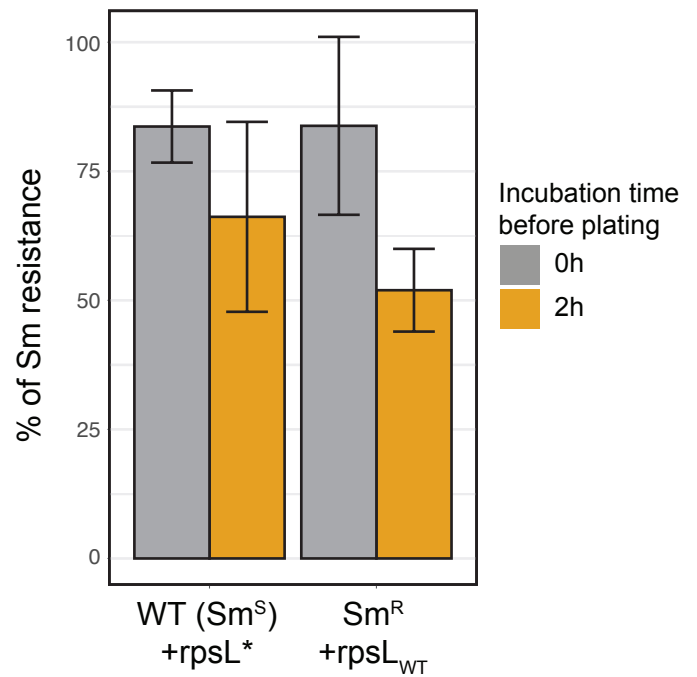

## Figure 3–figure supplement 2

**A**

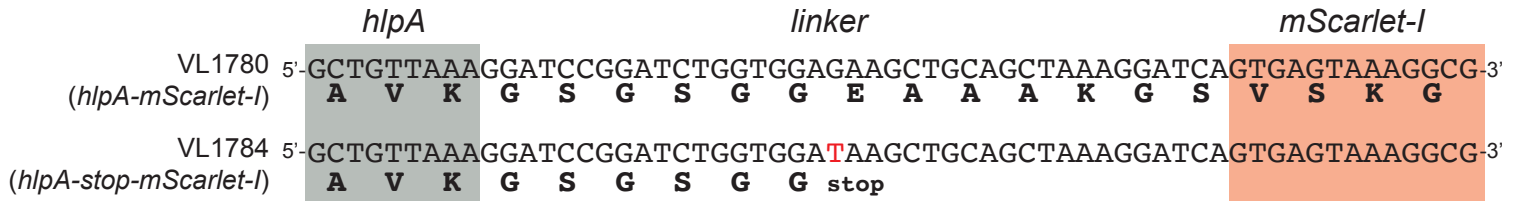

**B**

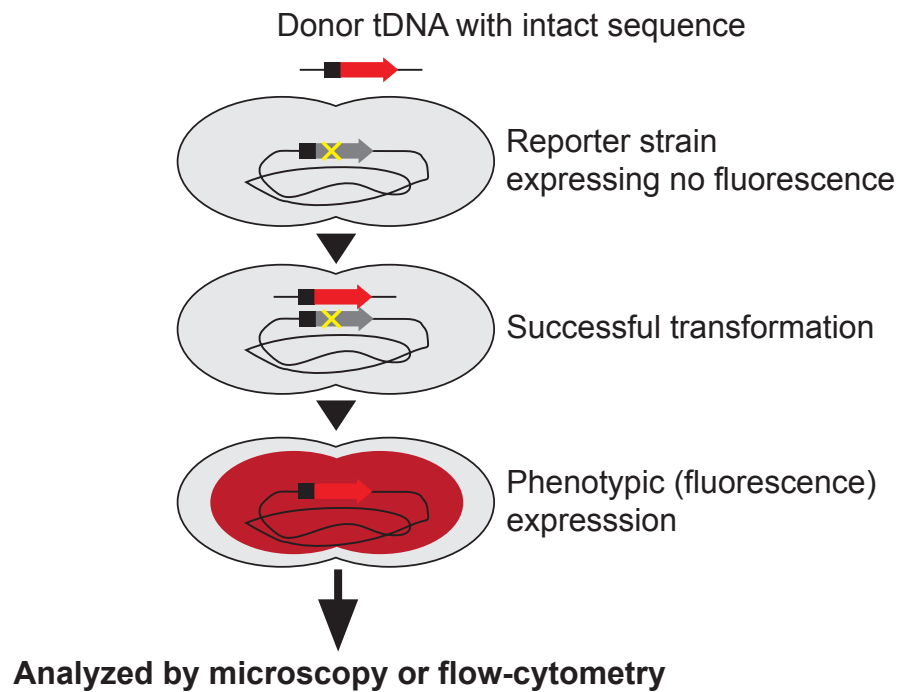

## Figure 3—figure supplement 3

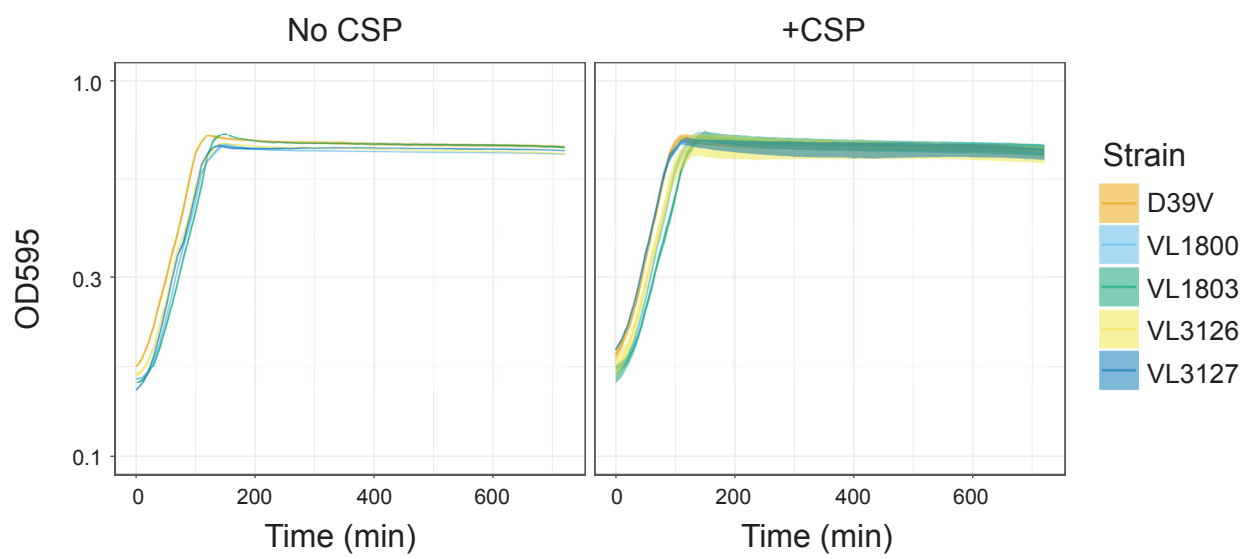

# Figure 3—figure supplement 4

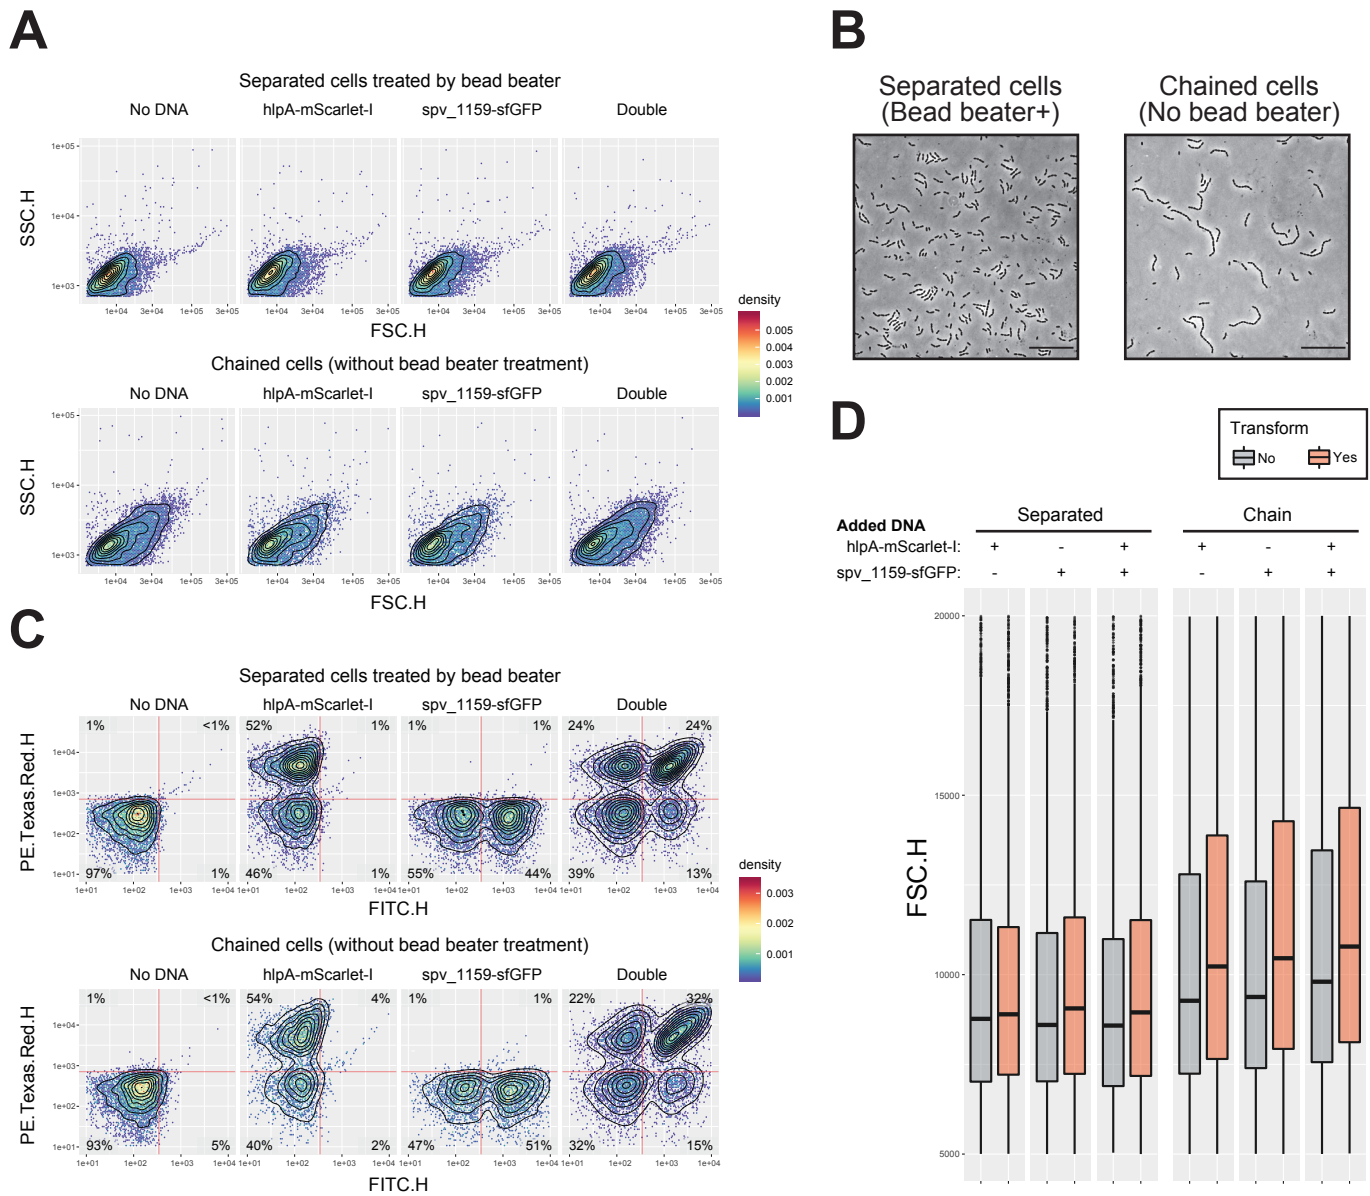

## Figure 4—figure supplement 1

**A**

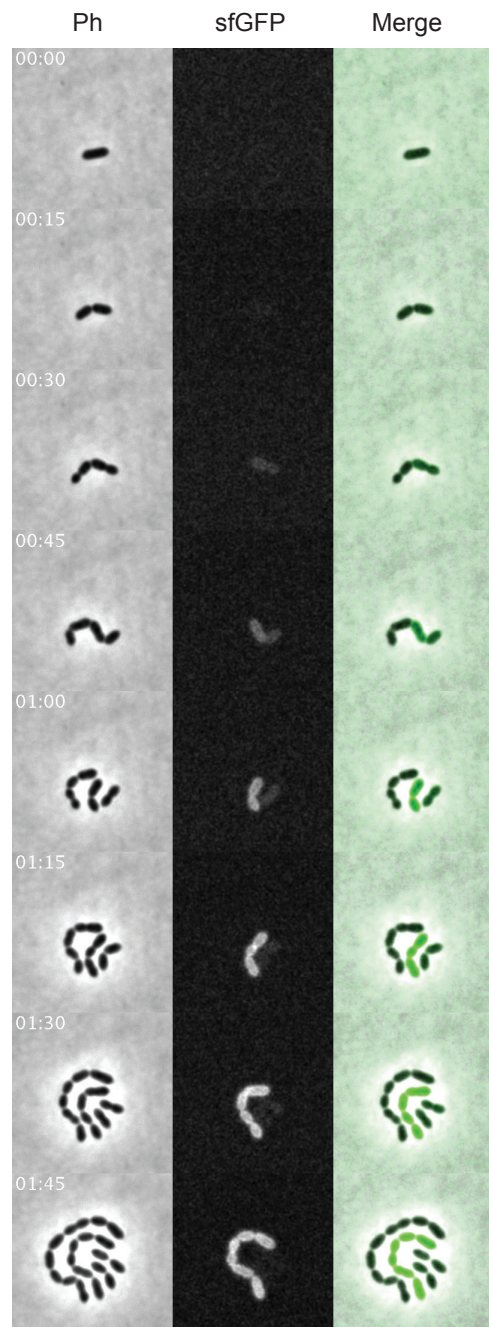

**B**

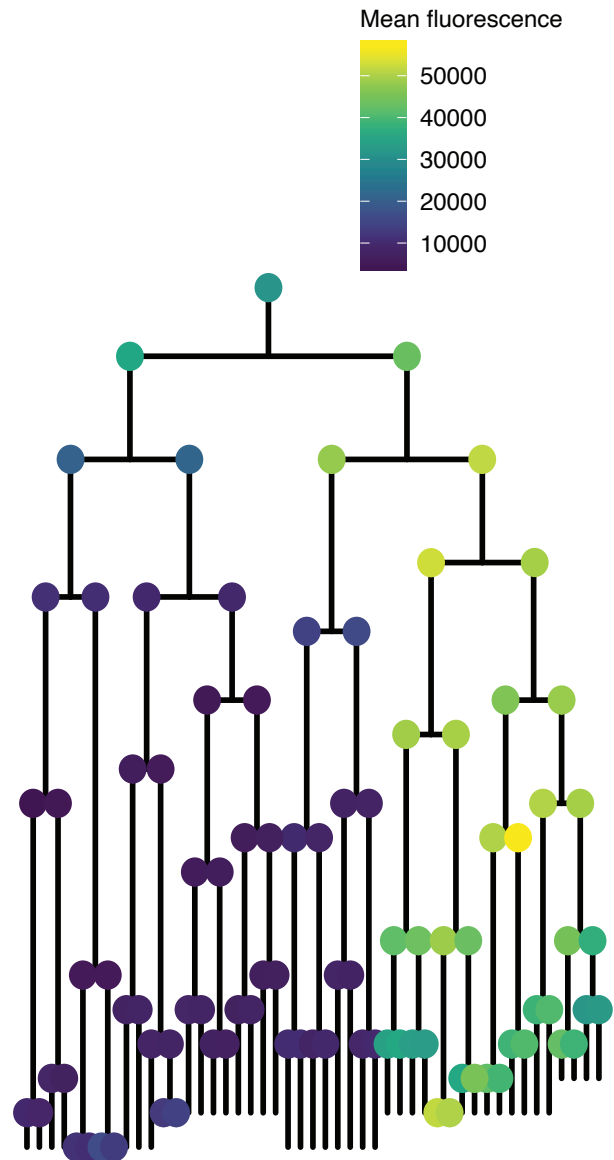

# Figure 4—figure supplement 2

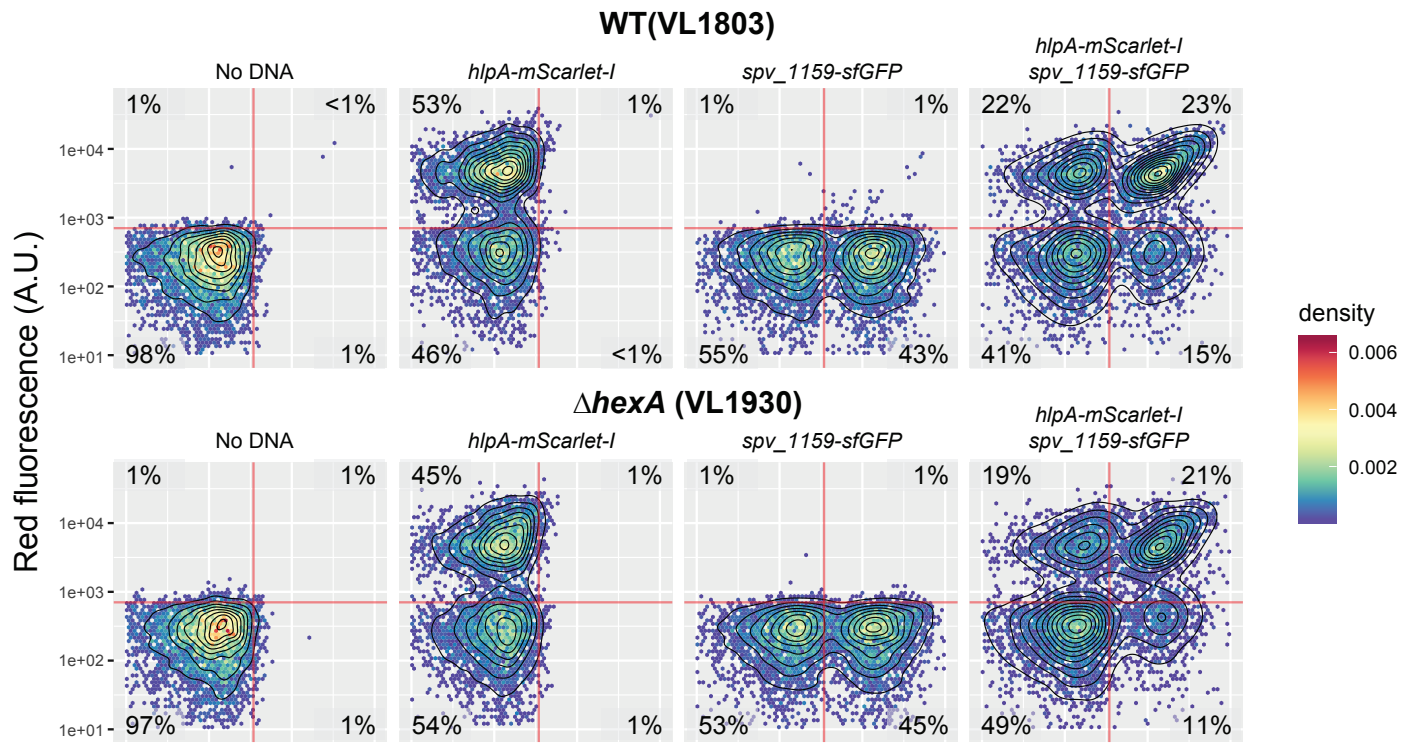

## Figure 4–figure supplement 3

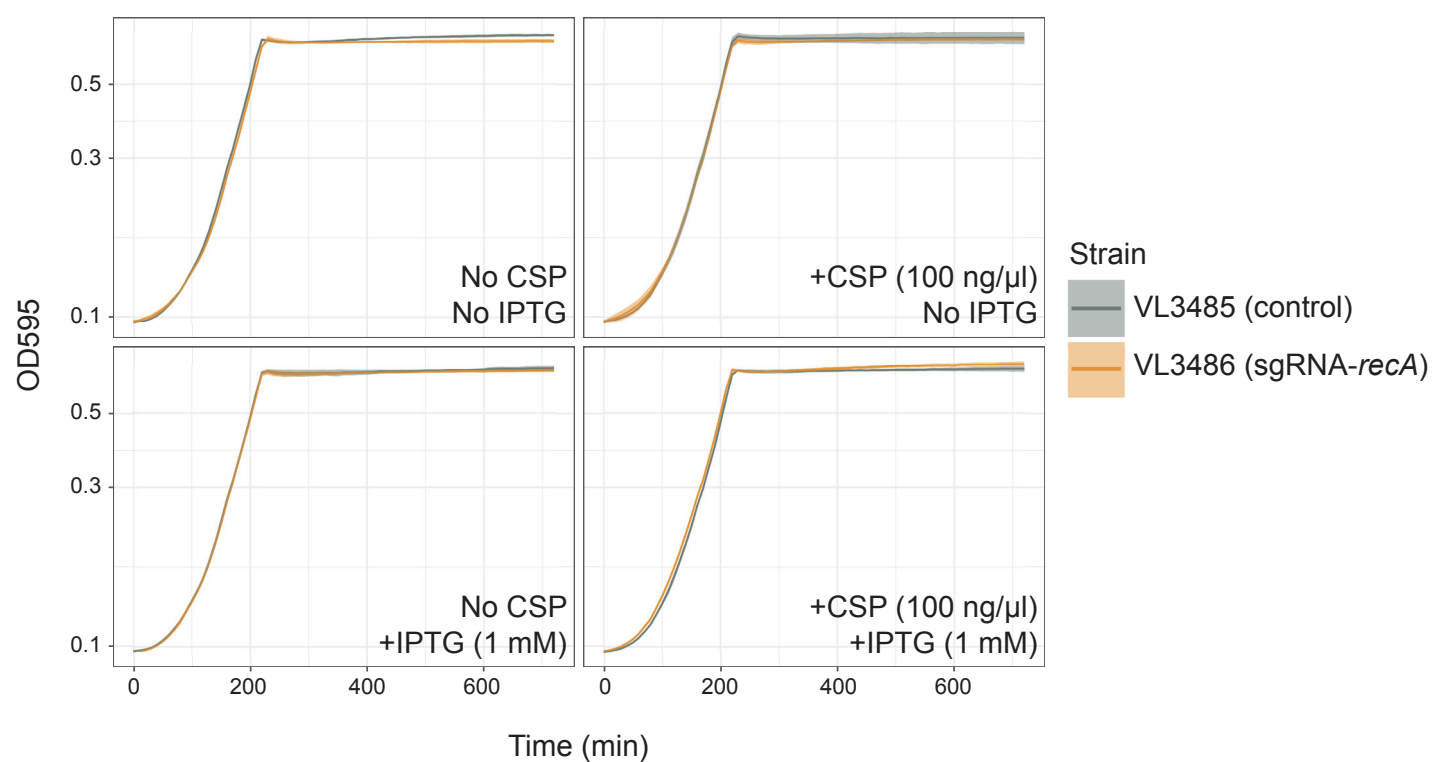

## Figure 5—figure supplement 1

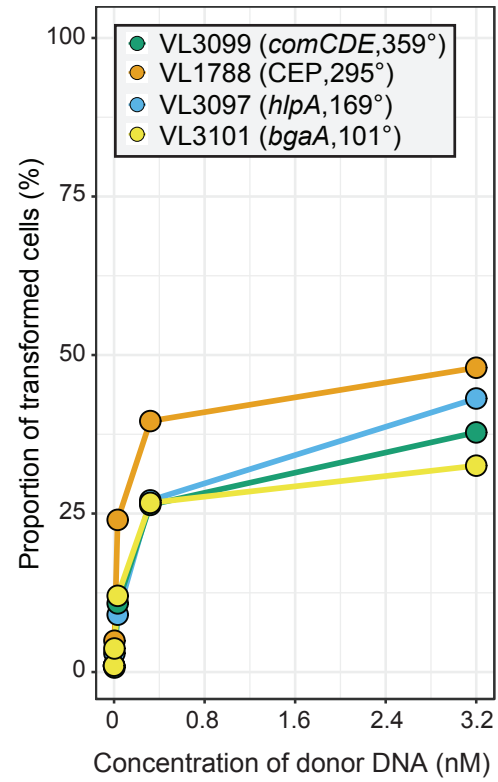



# Figure 5-figure supplement 2

**A**

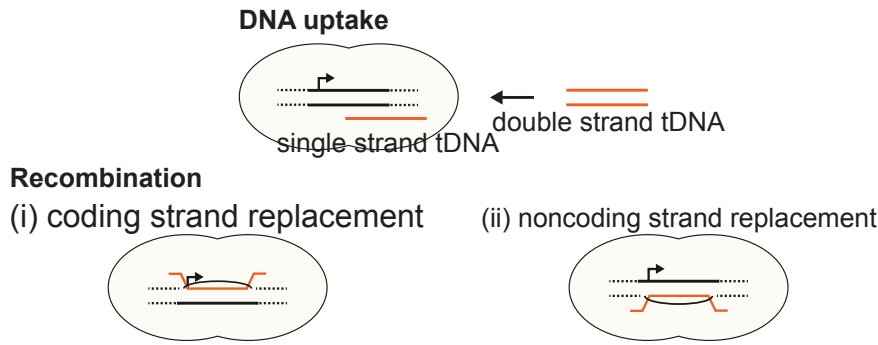

**B**

(i) Allele replacement on coding strand (late phenotypic expression)

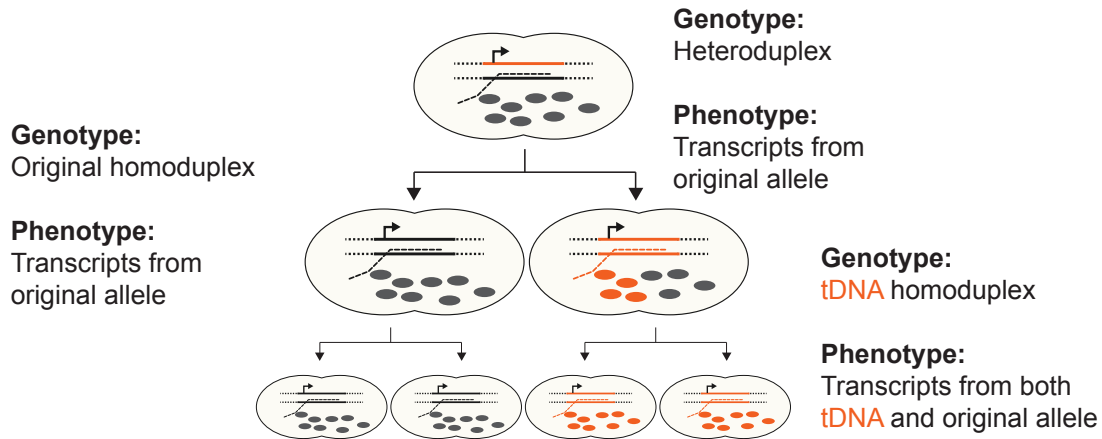

(ii) Allele replacement on noncoding strand (early phenotypic expression)

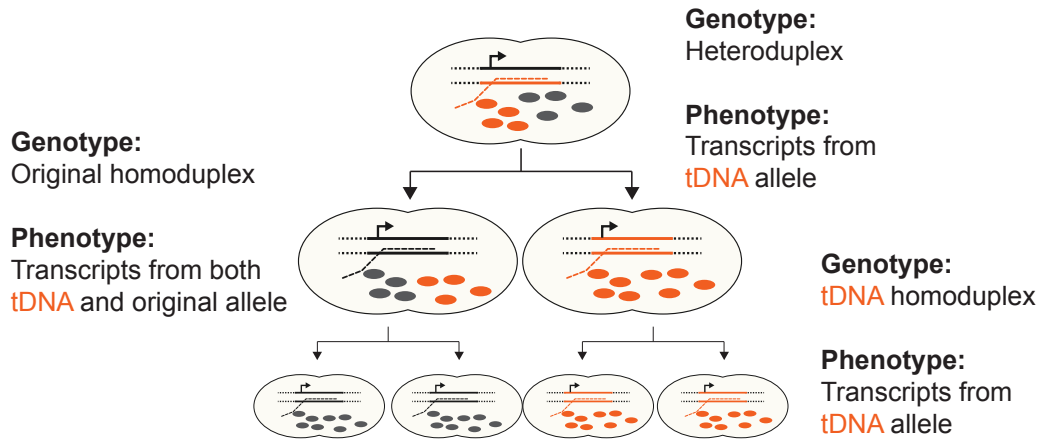

**C**

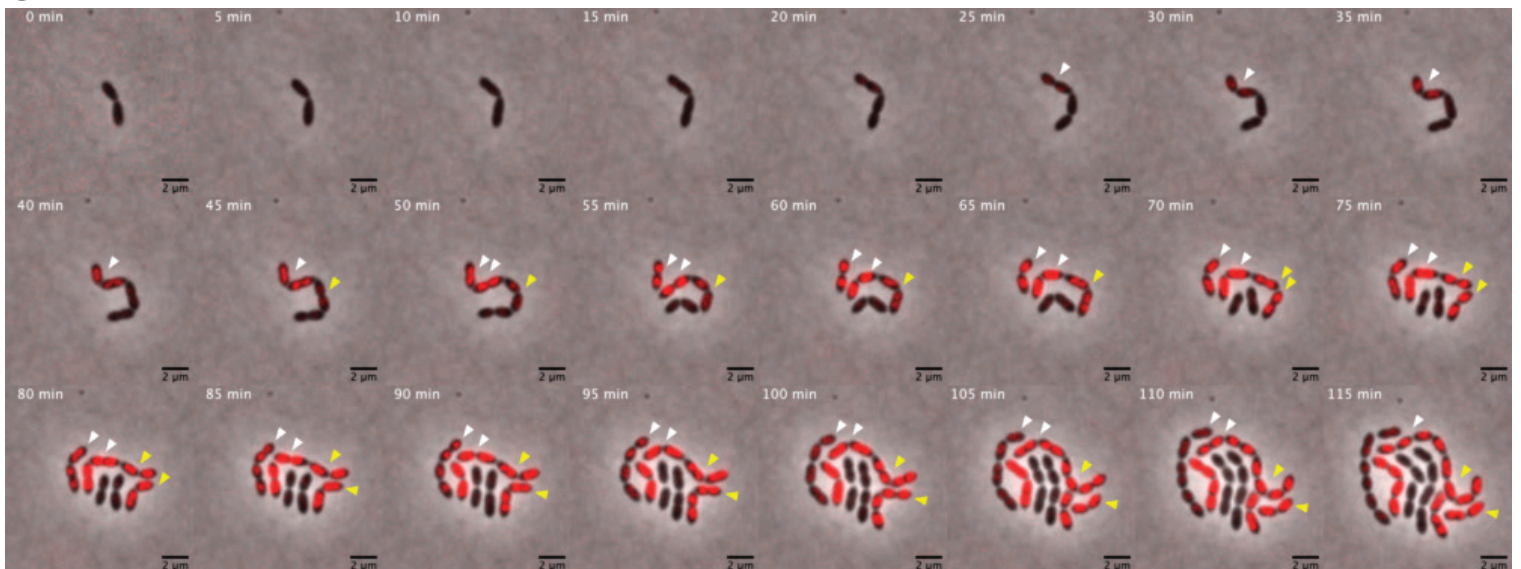

## Figure 6–figure supplement 1

**A**

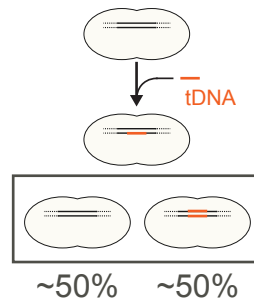

**B**

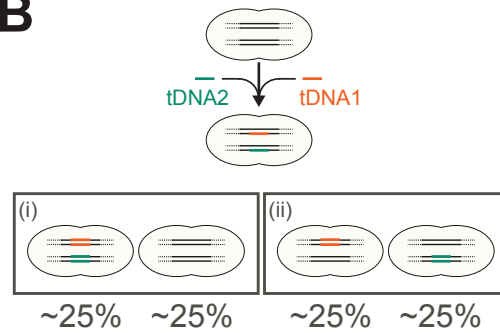

**C**

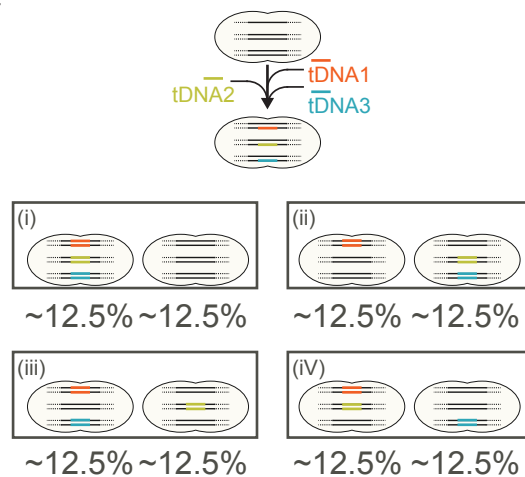

Source: https://www.biorxiv.org/content/10.1101/2020.03.15.992354v3.full.pdf
